# Supplementary material
Source: publisher figshare collection journal article supplement (https://gsajournals.figshare.com/ndownloader/files/15568685)
Supplement: Supplementary file 1 [file 15568685]

## Sheet: Table S1
Table S1 A list of short hairpin (shRNA) strains screened.
TRiP #	BDSC Stock #	Flybase ID	Gene Symbol	Gene Name	Gene Snapshot	GO Biological Process	GO Cellular Component	GO Molecular Function
HMS00146	34831	FBgn0003525	stg	string	-	protein dephosphorylation ; GO:0006470 | inferred from direct assay positive regulation of cell population proliferation ; GO:0008284 | inferred from mutant phenotype G2/M transition of mitotic cell cycle ; GO:0000086 | inferred from sequence or structural similarity Golgi organization ; GO:0007030 | inferred from mutant phenotype G2/M transition of mitotic cell cycle ; GO:0000086 | traceable aut…	nucleus ; GO:0005634 | inferred from biological aspect of ancestor with PANTHER:PTN000850864 cytoplasm ; GO:0005737 | inferred from biological aspect of ancestor with PANTHER:PTN000850864 chromosome ; GO:0005694 | inferred from direct assay nucleus ; GO:0005634 | inferred from direct assay	protein tyrosine/serine/threonine phosphatase activity ; GO:0008138 | non-traceable author statement protein tyrosine phosphatase activity ; GO:0004725 | inferred from biological aspect of ancestor with PANTHER:PTN000850864 protein tyrosine phosphatase activity ; GO:0004725 | inferred from direct assay
HMC03802	55734	FBgn0035918	Cdc6	Cdc6	Cdc6 is an essential component of the pre-Replication complex (preRC) together with the origin recognition complex, dup and MCM2-7 proteins. The preRC is present at all chromosomal origins of replication and is required for the initiation of DNA replication. Cdc6 also functions in the co-ordination of DNA replication with mitosis, and may contribute to apoptosis and transcription. [Date last revi…	cell division ; GO:0051301 | inferred from electronic annotation with InterPro:IPR016314 DNA replication initiation ; GO:0006270 | inferred from electronic annotation with InterPro:IPR016314 mitotic cell cycle ; GO:0000278 | inferred from biological aspect of ancestor with PANTHER:PTN000080055 mitotic DNA replication checkpoint ; GO:0033314 | inferred from biological aspect of ancestor with PANTH…	nucleus ; GO:0005634 | inferred from direct assay nucleus ; GO:0005634 | inferred from biological aspect of ancestor with PANTHER:PTN000080129	DNA replication origin binding ; GO:0003688 | inferred from biological aspect of ancestor with PANTHER:PTN000080055
HMJ22229	58221	FBgn0035766	eco	Establishment of cohesion	-	meiotic chromosome segregation ; GO:0045132 | inferred from electronic annotation with InterPro:IPR033257 post-translational protein acetylation ; GO:0034421 | inferred from biological aspect of ancestor with PANTHER:PTN000118027 sister chromatid cohesion ; GO:0007062 | inferred from biological aspect of ancestor with PANTHER:PTN000118027 regulation of DNA replication ; GO:0006275 | inferred from…	nuclear chromatin ; GO:0000790 | inferred from sequence or structural similarity with UniProtKB:P43605	acetyltransferase activity ; GO:0016407 | inferred from sequence or structural similarity with SGD:S000001923 acetyltransferase activity ; GO:0016407 | inferred from sequence or structural similarity with UniProtKB:P43605
HMJ22597	60380	FBgn0024555	flfl	falafel	Falafel (Flfl) is the regulatory 3 subunit of protein phosphatase 4 (PP4). Flfl targets PP4 to the centromere to regulate kinetochore integrity in mitosis. Flfl is also a key mediator for the localization of mira and associated cell fate determinants during cell cycle. [Date last reviewed: 2016-09-01]	DNA repair ; GO:0006281 | inferred from mutant phenotype asymmetric neuroblast division ; GO:0055059 | inferred from mutant phenotype basal protein localization ; GO:0045175 | inferred from mutant phenotype	protein phosphatase 4 complex ; GO:0030289 | inferred from direct assay chromosome, centromeric region ; GO:0000775 | inferred from physical interaction with Cenp-C nucleus ; GO:0005634 | inferred from direct assay cytoplasm ; GO:0005737 | inferred from direct assay	protein binding ; GO:0005515 | inferred from physical interaction with mira
HMS01602	36712	FBgn0029800	lin-52	lin-52	lin-52 (lin-52) encodes a subunit of the MuvB core complex. The MuvB core binds to the oncoprotein encoded by Myb and the Rbf-E2f2-Dp tumor suppressor complex, thereby controlling the expression of many genes, including critical regulators of the cell cycle. [Date last reviewed: 2018-10-18]	negative regulation of execution phase of apoptosis ; GO:1900118 | inferred from mutant phenotype compound eye development ; GO:0048749 | inferred from mutant phenotype negative regulation of transcription by RNA polymerase II ; GO:0000122 | inferred from mutant phenotype	DRM complex ; GO:0070176 | inferred from electronic annotation with InterPro:IPR018737 nucleus ; GO:0005634 | inferred from direct assay Myb complex ; GO:0031523 | inferred from direct assay polytene chromosome ; GO:0005700 | inferred from direct assay euchromatin ; GO:0000791 | inferred from direct assay	-
HMC04921	57732	FBgn0034878	pita	pita	pita (pita) encodes an architectural chromatin protein essential for embryonic development that organizes open chromatin in the regulatory regions (predominantly promoters). pita product functions include enhancer blocking, support of distant interactions, protection from spreading of repressed chromatin and recruitment of transcription factors. [Date last reviewed: 2018-09-13]	DNA endoreduplication ; GO:0042023 | inferred from mutant phenotype DNA replication ; GO:0006260 | inferred from mutant phenotype regulation of gene silencing ; GO:0060968 | inferred from mutant phenotype regulation of transcription, DNA-templated ; GO:0006355 | inferred from direct assay	polytene chromosome ; GO:0005700 | inferred from direct assay nucleus ; GO:0005634 | inferred from direct assay	zinc ion binding ; GO:0008270 | inferred from electronic annotation with InterPro:IPR012934 protein binding ; GO:0005515 | inferred from physical interaction with Cp190 chromatin insulator sequence binding ; GO:0043035 | inferred from direct assay DNA binding ; GO:0003677 | inferred from direct assay chromatin binding ; GO:0003682 | inferred from direct assay sequence-specific DNA binding ; GO:00…
HMC03192	51705	FBgn0051660	smog	smog	-	convergent extension involved in gastrulation ; GO:0060027 | inferred from mutant phenotype apical constriction involved in gastrulation ; GO:0003384 | inferred from mutant phenotype regulation of gastrulation ; GO:0010470 | inferred from mutant phenotype G protein-coupled receptor signaling pathway ; GO:0007186 | inferred from sequence or structural similarity with mGluR positive regulation of a…	integral component of plasma membrane ; GO:0005887 | inferred from sequence or structural similarity with mGluR	G protein-coupled receptor activity ; GO:0004930 | inferred from sequence or structural similarity with mGluR
HMJ21898	57851	FBgn0004636	Rap1	Rap1 GTPase	Rap1 GTPase is a small GTPase in the Ras superfamily. When GTP bound, it binds to a number of different effectors, one of which is cno. Together they regulate many morphogenetic movements from mesoderm invagination to dorsal closure, help establish apical-basal polarity during cellularization, regulate macrophage migration, help define neuroblast asymmetric division, and play a role in planar cel…	positive regulation of sevenless signaling pathway ; GO:0045874 | inferred from genetic interaction with sev dorsal closure ; GO:0007391 | inferred from mutant phenotype ovarian follicle cell stalk formation ; GO:0030713 | traceable author statement adherens junction assembly ; GO:0034333 | inferred from genetic interaction with PDZ-GEF germ-line stem cell population maintenance ; GO:0030718 | in…	membrane ; GO:0016020 | inferred from electronic annotation with InterPro:IPR020849 plasma membrane ; GO:0005886 | inferred from high throughput direct assay cell leading edge ; GO:0031252 | inferred from direct assay	GTP binding ; GO:0005525 | inferred from electronic annotation with InterPro:IPR001806, InterPro:IPR005225, InterPro:IPR020849 protein binding ; GO:0005515 | inferred from physical interaction with Rgl GTPase activity ; GO:0003924 | inferred from direct assay protein binding ; GO:0005515 | inferred from physical interaction with cno, PDZ-GEF
HMS01088	33749	FBgn0062442	Cisd2	CDGSH iron sulfur domain 2	-	biological_process ; GO:0008150 | no biological data available	intracellular membrane-bounded organelle ; GO:0043231 | inferred from electronic annotation with InterPro:IPR006622, InterPro:IPR018967, InterPro:IPR019610 cellular_component ; GO:0005575 | no biological data available	2 iron, 2 sulfur cluster binding ; GO:0051537 | inferred from electronic annotation with InterPro:IPR006622, InterPro:IPR018967, InterPro:IPR019610 molecular_function ; GO:0003674 | no biological data available
HMC04760	57452	FBgn0052598	betaNACtes6	Nascent-associated complex beta-subunit-like, testis 6	Insufficient genetic data for FlyBase to solicit a summary. [Date last reviewed: 2016-06-30]	biological_process ; GO:0008150 | no biological data available	cellular_component ; GO:0005575 | no biological data available	molecular_function ; GO:0003674 | no biological data available
HMJ22316	58253	FBgn0029710	CG3568	-	Insufficient genetic data for FlyBase to solicit a summary. [Date last reviewed: 2016-10-13]	biological_process ; GO:0008150 | no biological data available	cellular_component ; GO:0005575 | no biological data available	molecular_function ; GO:0003674 | no biological data available
HMJ23007	61228	FBgn0038753	CG4459	-	Insufficient genetic data for FlyBase to solicit a summary. [Date last reviewed: 2016-06-30]	transmembrane transport ; GO:0055085 | inferred from electronic annotation with InterPro:IPR011701	integral component of membrane ; GO:0016021 | inferred from electronic annotation with InterPro:IPR011701	-
HMC04988	57794	FBgn0037687	CG8132	-	-	oxaloacetate metabolic process ; GO:0006107 | inferred from biological aspect of ancestor with PANTHER:PTN000557480 asparagine metabolic process ; GO:0006528 | inferred from biological aspect of ancestor with PANTHER:PTN000557480 glutamine metabolic process ; GO:0006541 | inferred from biological aspect of ancestor with PANTHER:PTN000557480	-	omega-amidase activity ; GO:0050152 | inferred from biological aspect of ancestor with PANTHER:PTN000557480
HMC03556	53327	FBgn0031824	CG9547	-	Insufficient genetic data for FlyBase to solicit a summary. [Date last reviewed: 2016-06-30]	oxidation-reduction process ; GO:0055114 | inferred from electronic annotation with InterPro:IPR006091, InterPro:IPR009075, InterPro:IPR009100, InterPro:IPR013786 tryptophan metabolic process ; GO:0006568 | inferred from sequence or structural similarity with UniProtKB:Q92947 lysine catabolic process ; GO:0006554 | inferred from sequence or structural similarity with UniProtKB:Q92947 hydroxylysin…	mitochondrion ; GO:0005739 | inferred from biological aspect of ancestor with PANTHER:PTN000098492 mitochondrial matrix ; GO:0005759 | inferred from sequence or structural similarity with UniProtKB:Q92947	flavin adenine dinucleotide binding ; GO:0050660 | inferred from electronic annotation with InterPro:IPR013786 glutaryl-CoA dehydrogenase activity ; GO:0004361 | inferred from sequence or structural similarity with UniProtKB:Q92947
HMJ22588	60875	FBgn0037354	CG12171	-	-	-	-	testosterone 17-beta-dehydrogenase (NADP+) activity ; GO:0047045 | inferred from sequence or structural similarity with UniProtKB:Q9BPX1 estradiol 17-beta-dehydrogenase activity ; GO:0004303 | inferred from sequence or structural similarity with UniProtKB:Q9BPX1
HMJ21610	52943	FBgn0085203	CG34174	-	Insufficient genetic data for FlyBase to solicit a summary. [Date last reviewed: 2016-10-13]	biological_process ; GO:0008150 | no biological data available	cellular_component ; GO:0005575 | no biological data available	molecular_function ; GO:0003674 | no biological data available
HMC04589	57206	FBgn0085206	CG34177	-	Insufficient genetic data for FlyBase to solicit a summary. [Date last reviewed: 2016-06-30]	-	extracellular space ; GO:0005615 | inferred from sequence model	-
HMC04766	57457	FBgn0260390	CG42516	-	Insufficient genetic data for FlyBase to solicit a summary. [Date last reviewed: 2016-06-30]	transcription by RNA polymerase III ; GO:0006383 | inferred from biological aspect of ancestor with PANTHER:PTN001474144	transcription factor TFIIIC complex ; GO:0000127 | inferred from biological aspect of ancestor with PANTHER:PTN001474144	-
HMJ22594	60377	FBgn0010339	128up	upstream of RpIII128	Insufficient genetic data for FlyBase to solicit a summary. [Date last reviewed: 2016-06-30]	cytoplasmic translation ; GO:0002181 | inferred from biological aspect of ancestor with PANTHER:PTN002454928	cytoplasm ; GO:0005737 | inferred from biological aspect of ancestor with PANTHER:PTN002454928	GTP binding ; GO:0005525 | inferred from biological aspect of ancestor with PANTHER:PTN002454928 GTP binding ; GO:0005525 | inferred from direct assay
HMC04594	57211	FBgn0031851	Aatf	Apoptosis antagonizing transcription factor	Apoptosis antagonizing transcription factor (Aatf) encodes a transcription factor that is a target of the kinases encoded by tefu and lok. It is involved in the control of the cell cycle, DNA damage response, and regulation of apoptosis. [Date last reviewed: 2018-11-15]	negative regulation of programmed cell death ; GO:0043069 | inferred from mutant phenotype oogenesis ; GO:0048477 | inferred from mutant phenotype	nucleolus ; GO:0005730 | inferred from biological aspect of ancestor with PANTHER:PTN000399850 nucleolus ; GO:0005730 | inferred from direct assay nucleus ; GO:0005634 | inferred from sequence or structural similarity with UniProtKB:Q9NY61	molecular_function ; GO:0003674 | no biological data available
HMS02307	41885	FBgn0263120	Acsl	Acyl-CoA synthetase long-chain	-	early endosome to recycling endosome transport ; GO:0061502 | inferred from mutant phenotype positive regulation of sequestering of triglyceride ; GO:0010890 | inferred from mutant phenotype axon guidance ; GO:0007411 | inferred from mutant phenotype negative regulation of BMP signaling pathway ; GO:0030514 | inferred from mutant phenotype inferred from genetic interaction with tkv inferred from …	axon ; GO:0030424 | inferred from direct assay cytoplasm ; GO:0005737 | inferred from direct assay endoplasmic reticulum ; GO:0005783 | inferred from direct assay peroxisome ; GO:0005777 | inferred from direct assay	long-chain fatty acid-CoA ligase activity ; GO:0004467 | inferred from sequence or structural similarity with HGNC:3570,HGNC:3571 long-chain fatty acid-CoA ligase activity ; GO:0004467 | traceable author statement palmitoyl-CoA ligase activity ; GO:0090433 | inferred from mutant phenotype
HMS02487	42651	FBgn0000042	Act5C	Actin 5C	-	chromatin remodeling ; GO:0006338 | inferred by curator from GO:0031011 cytoskeleton organization ; GO:0007010 | inferred from sequence or structural similarity sperm individualization ; GO:0007291 | inferred from expression pattern maintenance of protein location in cell ; GO:0032507 | inferred from mutant phenotype tube formation ; GO:0035148 | inferred from genetic interaction with eys inferre…	brahma complex ; GO:0035060 | inferred from direct assay Ino80 complex ; GO:0031011 | inferred from direct assay actin filament ; GO:0005884 | inferred from sequence or structural similarity	structural constituent of cytoskeleton ; GO:0005200 | inferred from sequence or structural similarity
HMJ03126	50905	FBgn0263738	Ada2a	transcriptional Adaptor 2a	-	regulation of histone acetylation ; GO:0035065 | inferred from electronic annotation with InterPro:IPR016827 regulation of transcription by RNA polymerase II ; GO:0006357 | inferred from electronic annotation with InterPro:IPR016827 histone H4 acetylation ; GO:0043967 | inferred from direct assay histone acetylation ; GO:0016573 | inferred from direct assay histone H3 acetylation ; GO:0043966 | i…	transcriptionally active chromatin ; GO:0035327 | inferred from direct assay Ada2/Gcn5/Ada3 transcription activator complex ; GO:0005671 | inferred from direct assay nucleus ; GO:0005634 | inferred from direct assay	DNA binding ; GO:0003677 | inferred from electronic annotation with InterPro:IPR009057 transcription coactivator activity ; GO:0003713 | inferred from electronic annotation with InterPro:IPR016827 protein binding ; GO:0005515 | inferred from physical interaction with UniProtKB:O76216 histone acetyltransferase activity ; GO:0004402 | contributes_to inferred from direct assay
HMJ03126	50905	FBgn0263738	Ada2a	transcriptional Adaptor 2a	-	regulation of histone acetylation ; GO:0035065 | inferred from electronic annotation with InterPro:IPR016827 regulation of transcription by RNA polymerase II ; GO:0006357 | inferred from electronic annotation with InterPro:IPR016827 histone H4 acetylation ; GO:0043967 | inferred from direct assay histone acetylation ; GO:0016573 | inferred from direct assay histone H3 acetylation ; GO:0043966 | i…	transcriptionally active chromatin ; GO:0035327 | inferred from direct assay Ada2/Gcn5/Ada3 transcription activator complex ; GO:0005671 | inferred from direct assay nucleus ; GO:0005634 | inferred from direct assay	DNA binding ; GO:0003677 | inferred from electronic annotation with InterPro:IPR009057 transcription coactivator activity ; GO:0003713 | inferred from electronic annotation with InterPro:IPR016827 protein binding ; GO:0005515 | inferred from physical interaction with UniProtKB:O76216 histone acetyltransferase activity ; GO:0004402 | contributes_to inferred from direct assay
HMC05117	60123	FBgn0263738	Ada2a	transcriptional Adaptor 2a	-	regulation of histone acetylation ; GO:0035065 | inferred from electronic annotation with InterPro:IPR016827 regulation of transcription by RNA polymerase II ; GO:0006357 | inferred from electronic annotation with InterPro:IPR016827 histone H4 acetylation ; GO:0043967 | inferred from direct assay histone acetylation ; GO:0016573 | inferred from direct assay histone H3 acetylation ; GO:0043966 | i…	transcriptionally active chromatin ; GO:0035327 | inferred from direct assay Ada2/Gcn5/Ada3 transcription activator complex ; GO:0005671 | inferred from direct assay nucleus ; GO:0005634 | inferred from direct assay	DNA binding ; GO:0003677 | inferred from electronic annotation with InterPro:IPR009057 transcription coactivator activity ; GO:0003713 | inferred from electronic annotation with InterPro:IPR016827 protein binding ; GO:0005515 | inferred from physical interaction with UniProtKB:O76216 histone acetyltransferase activity ; GO:0004402 | contributes_to inferred from direct assay
HMC05117	60123	FBgn0263738	Ada2a	transcriptional Adaptor 2a	-	regulation of histone acetylation ; GO:0035065 | inferred from electronic annotation with InterPro:IPR016827 regulation of transcription by RNA polymerase II ; GO:0006357 | inferred from electronic annotation with InterPro:IPR016827 histone H4 acetylation ; GO:0043967 | inferred from direct assay histone acetylation ; GO:0016573 | inferred from direct assay histone H3 acetylation ; GO:0043966 | i…	transcriptionally active chromatin ; GO:0035327 | inferred from direct assay Ada2/Gcn5/Ada3 transcription activator complex ; GO:0005671 | inferred from direct assay nucleus ; GO:0005634 | inferred from direct assay	DNA binding ; GO:0003677 | inferred from electronic annotation with InterPro:IPR009057 transcription coactivator activity ; GO:0003713 | inferred from electronic annotation with InterPro:IPR016827 protein binding ; GO:0005515 | inferred from physical interaction with UniProtKB:O76216 histone acetyltransferase activity ; GO:0004402 | contributes_to inferred from direct assay
HMC03509	53293	FBgn0262739	AGO1	Argonaute-1	Argonaute-1 is an Argonaute/Piwi family protein, which interacts with microRNAs to form miRNA-induced silencing complexes (miRISCs). miRISCs are guided to target and repress mRNAs either by transcript destabilisation, translational inhibition, or both. [Date last reviewed: 2016-06-23]	chromatin silencing ; GO:0006342 | inferred from mutant phenotype synapse assembly ; GO:0007416 | traceable author statement mRNA cleavage involved in gene silencing by miRNA ; GO:0035279 | inferred from mutant phenotype RNA interference ; GO:0016246 | traceable author statement germarium-derived oocyte fate determination ; GO:0007294 | inferred from mutant phenotype targeting of mRNA for destruc…	nucleus ; GO:0005634 | inferred from direct assay perinuclear region of cytoplasm ; GO:0048471 | inferred from direct assay cytoplasm ; GO:0005737 | inferred from direct assay ribonucleoprotein complex ; GO:1990904 | inferred from direct assay	protein binding ; GO:0005515 | inferred from physical interaction with AGO2 enzyme binding ; GO:0019899 | inferred from physical interaction with Dcr-1 protein binding ; GO:0005515 | inferred from physical interaction with UniProtKB:Q8SY33 miRNA binding ; GO:0035198 | inferred from direct assay
HMJ02109	42539	FBgn0027932	Akap200	A kinase anchor protein 200	-	positive regulation of Notch signaling pathway ; GO:0045747 | inferred from direct assay circadian rhythm ; GO:0007623 | inferred from mutant phenotype positive regulation of protein localization to membrane ; GO:1905477 | inferred from mutant phenotype regulation of establishment of planar polarity ; GO:0090175 | inferred from mutant phenotype negative regulation of Ras protein signal transducti…	cytosol ; GO:0005829 | inferred from direct assay plasma membrane ; GO:0005886 | inferred from high throughput direct assay plasma membrane ; GO:0005886 | inferred from mutant phenotype cytoplasm ; GO:0005737 | inferred from high throughput direct assay cytoskeleton ; GO:0005856 | inferred from direct assay cytosol ; GO:0005829 | inferred from mutant phenotype plasma membrane ; GO:0005886 | infer…	protein binding ; GO:0005515 | inferred from physical interaction with UniProtKB:P62152 Notch binding ; GO:0005112 | inferred from physical interaction with UniProtKB:P07207 protein kinase A regulatory subunit binding ; GO:0034237 | inferred from physical interaction with UniProtKB:P81900 actin filament binding ; GO:0051015 | inferred from direct assay protein kinase A regulatory subunit binding …
HMC03240	51489	FBgn0020764	Alas	Aminolevulinate synthase	Aminolevulinate synthase is a mitochondrial enzyme involved in cuticle barrier formation and thought to have a role in Heme biosynthesis. [Date last reviewed: 2016-08-18]	chitin-based cuticle development ; GO:0040003 | inferred from mutant phenotype heme biosynthetic process ; GO:0006783 | inferred from sequence or structural similarity with UniProtKB:P13196 inferred from sequence or structural similarity with UniProtKB:P22557	mitochondrial matrix ; GO:0005759 | inferred from sequence or structural similarity with UniProt:P22557 inferred from sequence or structural similarity with UniProtKB:P13196	pyridoxal phosphate binding ; GO:0030170 | inferred from electronic annotation with InterPro:IPR004839, InterPro:IPR010961 5-aminolevulinate synthase activity ; GO:0003870 | inferred from sequence or structural similarity with RGD:2084 5-aminolevulinate synthase activity ; GO:0003870 | inferred from sequence or structural similarity with UniProt:P22557 inferred from sequence or structural similar…
HMC03502	53286	FBgn0038552	Alg1	ALG1, chitobiosyldiphosphodolichol beta-mannosyltransferase	-	protein glycosylation ; GO:0006486 | inferred from biological aspect of ancestor with PANTHER:PTN000315506	endoplasmic reticulum ; GO:0005783 | inferred from biological aspect of ancestor with PANTHER:PTN000315506	mannosyltransferase activity ; GO:0000030 | inferred from electronic annotation with InterPro:IPR026051
HMS01159	34681	FBgn0052076	Alg10	ALG10 alpha-1,2-glucosyltransferase	Insufficient genetic data for FlyBase to solicit a summary. [Date last reviewed: 2016-06-30]	dolichol-linked oligosaccharide biosynthetic process ; GO:0006488 | inferred from electronic annotation with InterPro:IPR016900 protein N-linked glycosylation ; GO:0006487 | inferred from sequence or structural similarity with UniProtKB:P50076	endoplasmic reticulum membrane ; GO:0005789 | inferred from sequence or structural similarity with UniProtKB:P50076	dolichyl-phosphate-glucose-glycolipid alpha-glucosyltransferase activity ; GO:0004583 | inferred from sequence or structural similarity with UniProtKB:P50076
HMS02040	40873	FBgn0086361	alph	alphabet	-	protein dephosphorylation ; GO:0006470 | inferred from electronic annotation with InterPro:IPR015655 regulation of p38MAPK cascade ; GO:1900744 | inferred from genetic interaction with lic response to UV-C ; GO:0010225 | inferred from mutant phenotype negative regulation of R7 cell differentiation ; GO:0045677 | inferred from genetic interaction with aop negative regulation of stress-activated MA…	nucleus ; GO:0005634 | inferred from biological aspect of ancestor with PANTHER:PTN002675662 cytosol ; GO:0005829 | inferred from biological aspect of ancestor with PANTHER:PTN002675662	manganese ion binding ; GO:0030145 | inferred from electronic annotation with InterPro:IPR012911 magnesium ion binding ; GO:0000287 | inferred from electronic annotation with InterPro:IPR012911 magnesium-dependent protein serine/threonine phosphatase activity ; GO:0004724 | inferred from biological aspect of ancestor with PANTHER:PTN000352745 protein serine/threonine phosphatase activity ; GO:000…
HMS01903	38987	FBgn0010215	alpha-Cat	alpha Catenin	-	cell adhesion ; GO:0007155 | inferred from electronic annotation with InterPro:IPR000633, InterPro:IPR001033, InterPro:IPR006077 adherens junction organization ; GO:0034332 | inferred from mutant phenotype apical constriction ; GO:0003383 | inferred from mutant phenotype dorsal closure, amnioserosa morphology change ; GO:0046664 | inferred from mutant phenotype cytoskeletal anchoring at plasma me…	actin cytoskeleton ; GO:0015629 | inferred from electronic annotation with InterPro:IPR000633 cell-cell adherens junction ; GO:0005913 | inferred from direct assay plasma membrane ; GO:0005886 | inferred from direct assay adherens junction ; GO:0005912 | non-traceable author statement spot adherens junction ; GO:0005914 | non-traceable author statement plasma membrane ; GO:0005886 | inferred from…	actin filament binding ; GO:0051015 | inferred from electronic annotation with InterPro:IPR001033, InterPro:IPR006077 cadherin binding ; GO:0045296 | inferred from electronic annotation with InterPro:IPR001033 structural molecule activity ; GO:0005198 | inferred from electronic annotation with InterPro:IPR000633 cytoskeletal protein binding ; GO:0008092 | inferred from sequence or structural simi…
HMC02991	50624	FBgn0030007	alpha-PheRS	Phenylalanyl-tRNA synthetase, alpha-subunit	Phenylalanyl-tRNA synthetase, Î±-subunit is a cytoplasmic aminoacyl-tRNA synthetase that catalyzes the ligation of Phenylalanine to its cognate tRNAPhe. Together with the Î²-subunit it forms a tetrameric enzyme complex. This subunit provides the catalytic core. [Date last reviewed: 2016-08-25]	phenylalanyl-tRNA aminoacylation ; GO:0006432 | traceable author statement phenylalanyl-tRNA aminoacylation ; GO:0006432 | inferred from biological aspect of ancestor with PANTHER:PTN000165932 phenylalanyl-tRNA aminoacylation ; GO:0006432 | inferred from direct assay inferred from mutant phenotype	cytoplasm ; GO:0005737 | inferred from biological aspect of ancestor with PANTHER:PTN000165932 phenylalanine-tRNA ligase complex ; GO:0009328 | inferred from biological aspect of ancestor with PANTHER:PTN000165935 cytoplasm ; GO:0005737 | traceable author statement cytosol ; GO:0005829 | inferred from biological aspect of ancestor with PANTHER:PTN000165935	tRNA binding ; GO:0000049 | inferred from electronic annotation with InterPro:IPR002319 ATP binding ; GO:0005524 | inferred from electronic annotation with InterPro:IPR002319, InterPro:IPR004529 phenylalanine-tRNA ligase activity ; GO:0004826 | inferred from direct assay aminoacyl-tRNA editing activity ; GO:0002161 | inferred from mutant phenotype phenylalanine-tRNA ligase activity ; GO:0004826 |…
HMC04371	56932	FBgn0250789	alpha-Spec	alpha Spectrin	Î± Spectrin (Î±-Spec) is an essential protein that interacts with Î²-Spec or kst to form a heterotetramer. It is typically associated with the plasma membrane. It functions in a lipoprotein pathway that delivers dietary fat to the larval fat body for storage. It is also believed to function in asymmetric division of germ line stem cells via cytoplasmic structures called spectrosomes and fusomes. …	neuromuscular synaptic transmission ; GO:0007274 | inferred from mutant phenotype germ-line cyst formation ; GO:0048134 | traceable author statement ovarian follicle cell development ; GO:0030707 | traceable author statement maintenance of presynaptic active zone structure ; GO:0048790 | inferred from direct assay plasma membrane organization ; GO:0007009 | traceable author statement regulation o…	plasma membrane ; GO:0005886 | inferred from direct assay cell cortex ; GO:0005938 | inferred from direct assay spectrin ; GO:0008091 | inferred from sequence or structural similarity Golgi apparatus ; GO:0005794 | inferred from direct assay basolateral plasma membrane ; GO:0016323 | inferred from direct assay neuromuscular junction ; GO:0031594 | inferred from direct assay fusome ; GO:0045169 | …	calcium ion binding ; GO:0005509 | inferred from electronic annotation with InterPro:IPR002048 cytoskeletal protein binding ; GO:0008092 | inferred from sequence or structural similarity actin binding ; GO:0003779 | inferred from direct assay microtubule binding ; GO:0008017 | inferred from direct assay actin binding ; GO:0003779 | inferred from sequence or structural similarity
HMJ23356	61867	FBgn0262167	ana1	anastral spindle 1	Anastral spindle 1 (Ana1) is a cytoplasmic protein located in the centrioles, including the sperm giant centriole and proximal centriole-like structure, which assists in centrioles formation. Ana1 roles include coordinated movement behavior, sperm motility, and fertility. [Date last reviewed: 2016-12-01]	cilium assembly ; GO:0060271 | inferred from mutant phenotype centrosome cycle ; GO:0007098 | inferred from mutant phenotype flagellated sperm motility ; GO:0030317 | inferred from mutant phenotype ciliary basal body organization ; GO:0032053 | inferred from mutant phenotype neuron development ; GO:0048666 | inferred from mutant phenotype centriole assembly ; GO:0098534 | inferred from mutant phe…	centriole ; GO:0005814 | inferred from direct assay ciliary basal body ; GO:0036064 | inferred from direct assay	-
HMS03009	36749	FBgn0012037	Ance	Angiotensin converting enzyme	Angiotensin converting enzyme (Ance) encodes a member of the peptidyl-dipeptidase A family of zinc metallopeptidases. Ance product is an extracellular glycosylated enzyme with a broad substrate specificity, cleaving dipeptides from the carboxy terminus of oligopeptides. [Date last reviewed: 2018-09-13]	proteolysis ; GO:0006508 | inferred from direct assay sperm individualization ; GO:0007291 | inferred from mutant phenotype spermatid nucleus differentiation ; GO:0007289 | inferred from mutant phenotype metamorphosis ; GO:0007552 | inferred from expression pattern response to symbiotic bacterium ; GO:0009609 | inferred from expression pattern inferred from mutant phenotype	extracellular space ; GO:0005615 | inferred from biological aspect of ancestor with PANTHER:PTN001630211 plasma membrane ; GO:0005886 | inferred from biological aspect of ancestor with PANTHER:PTN001630211 extracellular space ; GO:0005615 | inferred from direct assay	peptidyl-dipeptidase activity ; GO:0008241 | inferred from direct assay metallopeptidase activity ; GO:0008237 | inferred from biological aspect of ancestor with PANTHER:PTN000053976 peptidyl-dipeptidase activity ; GO:0008241 | inferred from biological aspect of ancestor with PANTHER:PTN000053976 dipeptidyl-peptidase activity ; GO:0008239 | inferred from biological aspect of ancestor with PANTHER…
HMS00653	32866	FBgn0264855	AP-2alpha	Adaptor Protein complex 2, alpha subunit	Adaptor Protein complex 2, Î± subunit (AP-2Î±) is a subunit of the AP-2 adaptor complex. It is required for proper intracellular trafficking and secretion. AP-2Î± contributes to asymmetric cell division, Notch signalling, apico-basal polarity and neurogenesis. [Date last reviewed: 2017-06-15]	clathrin-dependent endocytosis ; GO:0072583 | inferred from electronic annotation with InterPro:IPR017104 intracellular protein transport ; GO:0006886 | inferred from electronic annotation with InterPro:IPR002553, InterPro:IPR003164, InterPro:IPR008152, InterPro:IPR009028, InterPro:IPR013038, InterPro:IPR015873 regulation of endocytosis ; GO:0030100 | inferred from direct assay positive regulatio…	AP-2 adaptor complex ; GO:0030122 | inferred from mutant phenotype plasma membrane ; GO:0005886 | inferred from high throughput direct assay plasma membrane ; GO:0005886 | inferred from direct assay clathrin-coated pit ; GO:0005905 | inferred from direct assay	clathrin adaptor activity ; GO:0035615 | inferred from electronic annotation with InterPro:IPR017104 protein transporter activity ; GO:0008565 | inferred from direct assay protein transporter activity ; GO:0008565 | inferred from mutant phenotype
HMS01693	38249	FBgn0031458	aph-1	anterior pharynx defective 1	anterior pharynx defective 1 (aph-1) encodes a scaffolding subunit of the gamma-secretase complex together with the products of Psn, Nct and pen-2. It is involved in several Notch related processes such as differentiation, cellular organization and developmental patterning via gamma-secretase proteolitic function. [Date last reviewed: 2018-10-04]	positive regulation of catalytic activity ; GO:0043085 | inferred from electronic annotation with InterPro:IPR009294 protein processing ; GO:0016485 | inferred from biological aspect of ancestor with PANTHER:PTN000306732 Notch receptor processing ; GO:0007220 | inferred from biological aspect of ancestor with PANTHER:PTN000306733 Notch signaling pathway ; GO:0007219 | inferred from mutant phenoty…	late endosome ; GO:0005770 | inferred from direct assay integral component of plasma membrane ; GO:0005887 | non-traceable author statement recycling endosome ; GO:0055037 | inferred from direct assay endoplasmic reticulum ; GO:0005783 | inferred from biological aspect of ancestor with PANTHER:PTN000306732 integral component of plasma membrane ; GO:0005887 | inferred from biological aspect of anc…	endopeptidase activity ; GO:0004175 | inferred from mutant phenotype endopeptidase activity ; GO:0004175 | inferred from biological aspect of ancestor with PANTHER:PTN000306732
HMS01411	35001	FBgn0261854	aPKC	atypical protein kinase C	Atypical protein kinase C (aPKC) is a member of the conserved Par complex (aPKC/baz/par-6) and is asymmetrically localized to the apical cortex, where it phosphorylates and thus excludes the basal determinants mira and numb. It is involved in neuroblast proliferation and self-renewal. [Date last reviewed: 2016-06-30]	compound eye retinal cell programmed cell death ; GO:0046667 | inferred from direct assay adherens junction organization ; GO:0034332 | inferred from mutant phenotype terminal branching, open tracheal system ; GO:0007430 | inferred from mutant phenotype establishment or maintenance of neuroblast polarity ; GO:0045196 | non-traceable author statement synapse assembly ; GO:0007416 | inferred from m…	apical cortex ; GO:0045179 | inferred from direct assay subapical complex ; GO:0035003 | traceable author statement cell cortex ; GO:0005938 | traceable author statement apical plasma membrane ; GO:0016324 | inferred from direct assay apical cortex ; GO:0045179 | non-traceable author statement apical plasma membrane ; GO:0016324 | non-traceable author statement apicolateral plasma membrane ; GO:0…	ATP binding ; GO:0005524 | inferred from electronic annotation with InterPro:IPR000719, InterPro:IPR000961, InterPro:IPR002290, InterPro:IPR012233, InterPro:IPR017441, InterPro:IPR017892 protein serine/threonine kinase activity ; GO:0004674 | inferred from direct assay myosin binding ; GO:0017022 | inferred from physical interaction with Myo10A protein serine/threonine kinase activity ; GO:000467…
HMS01494	35751	FBgn0038132	apn	apnoia	Insufficient genetic data for FlyBase to solicit a summary. [Date last reviewed: 2016-06-30]	biological_process ; GO:0008150 | no biological data available	cellular_component ; GO:0005575 | no biological data available	molecular_function ; GO:0003674 | no biological data available
HMC04102	56881	FBgn0023535	arg	arginase	Arginase (Arg) converts arginine into ornithine. Lack of Arg produces a developmental embryonic delay. [Date last reviewed: 2016-09-01]	arginine catabolic process to ornithine ; GO:0019547 | inferred from sequence or structural similarity with UniProtKB:P78540 arginine catabolic process to ornithine ; GO:0019547 | inferred from biological aspect of ancestor with PANTHER:PTN000144386	cytosol ; GO:0005829 | inferred from biological aspect of ancestor with PANTHER:PTN000144387 cytoplasm ; GO:0005737 | inferred from biological aspect of ancestor with PANTHER:PTN000144386 mitochondrion ; GO:0005739 | inferred from sequence or structural similarity with UniProtKB:P78540	arginase activity ; GO:0004053 | inferred from biological aspect of ancestor with PANTHER:PTN000144386 arginase activity ; GO:0004053 | inferred from sequence or structural similarity with UniProtKB:P78540 manganese ion binding ; GO:0030145 | inferred from biological aspect of ancestor with PANTHER:PTN000144386
HMS01414	35004	FBgn0000117	arm	armadillo	Armadillo is the Drosophila homolog of beta-catenin. It plays separable roles in cell adhesion and Wingless signaling. It links classic cadherin cell adhesion receptors to alpha-catenin and the actin cytoskeleton, and it acts as the key regulated effector of Wingless signaling, working with TCF/LEF proteins as a transcriptional co-activator. [Date last reviewed: 2016-08-25]	wing disc morphogenesis ; GO:0007472 | inferred from mutant phenotype branch fusion, open tracheal system ; GO:0035147 | inferred from mutant phenotype cell elongation involved in imaginal disc-derived wing morphogenesis ; GO:0090254 | inferred from mutant phenotype ventral furrow formation ; GO:0007370 | inferred from mutant phenotype oogenesis ; GO:0048477 | inferred from mutant phenotype chiti…	apical plasma membrane ; GO:0016324 | inferred from direct assay catenin complex ; GO:0016342 | inferred from biological aspect of ancestor with PANTHER:PTN001153077 axon ; GO:0030424 | inferred from direct assay nucleus ; GO:0005634 | inferred from direct assay beta-catenin-TCF complex ; GO:1990907 | inferred from direct assay beta-catenin-TCF complex ; GO:1990907 | inferred from physical intera…	protein binding ; GO:0005515 | inferred from physical interaction with ssp transcription coactivator activity ; GO:0003713 | inferred from biological aspect of ancestor with PANTHER:PTN001153077 protein binding ; GO:0005515 | inferred from physical interaction with UniProtKB:P22265 protein binding ; GO:0005515 | inferred from physical interaction with UniProtKB:P46150 inferred from physical inter…
HMJ21357	53972	FBgn0262716	Arp3	Actin-related protein 3	-	ovarian follicle cell stalk formation ; GO:0030713 | inferred from mutant phenotype actin cytoskeleton organization ; GO:0030036 | inferred from mutant phenotype pseudocleavage involved in syncytial blastoderm formation ; GO:0030589 | inferred from physical interaction with Arpc1 chaeta development ; GO:0022416 | inferred from mutant phenotype plasma membrane tubulation ; GO:0097320 | inferred fr…	Arp2/3 protein complex ; GO:0005885 | inferred from sequence or structural similarity lamellipodium ; GO:0030027 | inferred from direct assay Arp2/3 protein complex ; GO:0005885 | inferred from sequence or structural similarity with HGNC:170 actin filament ; GO:0005884 | inferred from sequence or structural similarity with EMBL:M81068 Arp2/3 protein complex ; GO:0005885 | non-traceable author sta…	ATP binding ; GO:0005524 | inferred from electronic annotation with InterPro:IPR015623 structural constituent of cytoskeleton ; GO:0005200 | inferred from sequence or structural similarity structural constituent of cytoskeleton ; GO:0005200 | inferred from sequence or structural similarity with HGNC:170
HMC05280	62273	FBgn0267041	asRNA:CR45485	antisense RNA:CR45485	-	-	-	-
HMC05280	62273	FBgn0267041	asRNA:CR45485	antisense RNA:CR45485	-	-	-	-
HMJ22416	58309	FBgn0052672	Atg8a	Autophagy-related 8a	Autophagy-related 8a (Atg8a) is a ubiquitin-like protein that is conjugated to phosphatidylethanolamine, and this lipid modification anchors it into the membrane of forming and completed autophagosomes. Atg8a roles include autophagosome formation, maintaining neuromuscular function and normal lifespan. [Date last reviewed: 2016-06-30]	autophagy of mitochondrion ; GO:0000422 | inferred from biological aspect of ancestor with PANTHER:PTN000103525 cellular response to nitrogen starvation ; GO:0006995 | inferred from biological aspect of ancestor with PANTHER:PTN000103522 autophagy ; GO:0006914 | inferred from mutant phenotype determination of adult lifespan ; GO:0008340 | inferred from mutant phenotype determination of adult life…	autophagosome membrane ; GO:0000421 | inferred from biological aspect of ancestor with PANTHER:PTN000103525 autolysosome ; GO:0044754 | inferred from direct assay cytosol ; GO:0005829 | inferred from biological aspect of ancestor with PANTHER:PTN000103525 autophagosome ; GO:0005776 | inferred from direct assay type I terminal bouton ; GO:0061174 | inferred from direct assay amphisome ; GO:0044753…	protein kinase binding ; GO:0019901 | inferred from physical interaction with Atg1 protein tag ; GO:0031386 | inferred from sequence or structural similarity with SGD:S000000174 GABA receptor binding ; GO:0050811 | inferred from biological aspect of ancestor with PANTHER:PTN000861087
HMS02726	44012	FBgn0041188	Atx2	Ataxin-2	Ataxin-2 (Atx2) is the ortholog of human gene ATXN2, which is implicated in spinocerebellar ataxia 2. Atx2 contributes to eye development, circadian behaviour, and microRNA function. [Date last reviewed: 2017-06-15]	short-term memory ; GO:0007614 | NOT inferred from mutant phenotype long-term memory ; GO:0007616 | inferred from mutant phenotype locomotor rhythm ; GO:0045475 | inferred from mutant phenotype positive regulation of neuron death ; GO:1901216 | inferred from mutant phenotype chaeta development ; GO:0022416 | inferred from mutant phenotype habituation ; GO:0046959 | inferred from mutant phenotype …	cytoplasmic stress granule ; GO:0010494 | inferred from biological aspect of ancestor with PANTHER:PTN000304339 cytoplasm ; GO:0005737 | inferred from high throughput direct assay cytoplasm ; GO:0005737 | inferred from direct assay	protein binding ; GO:0005515 | inferred from physical interaction with tyf
HMJ22415	58308	FBgn0024227	aurB	aurora B	Aurora B (AurB) is a serine-threonine kinase and member of the chromosomal passenger complex. AurB plays multiple roles in mitosis including the correction of erroneous chromosome-spindle interactions, chromosome condensation, kinetochore assembly, spindle assembly checkpoint and cytokinesis. [Date last reviewed: 2016-09-01]	histone H3-S28 phosphorylation ; GO:0043988 | inferred from electronic annotation with InterPro:IPR028772 positive regulation of cytokinesis ; GO:0032467 | inferred from electronic annotation with InterPro:IPR028772 mitotic spindle assembly checkpoint ; GO:0007094 | inferred from electronic annotation with InterPro:IPR028772 chromatin organization ; GO:0006325 | inferred from mutant phenotype mit…	spindle microtubule ; GO:0005876 | inferred from biological aspect of ancestor with PANTHER:PTN000681967 condensed nuclear chromosome, centromeric region ; GO:0000780 | inferred from direct assay midbody ; GO:0030496 | inferred from direct assay spindle pole centrosome ; GO:0031616 | inferred from biological aspect of ancestor with PANTHER:PTN000681967 condensed nuclear chromosome, centromeric re…	ATP binding ; GO:0005524 | inferred from electronic annotation with InterPro:IPR000719, InterPro:IPR002290, InterPro:IPR017441 protein serine/threonine kinase activity ; GO:0004674 | inferred from sequence or structural similarity with HGNC:11390 histone serine kinase activity ; GO:0035174 | inferred from biological aspect of ancestor with PANTHER:PTN000681967 protein serine/threonine/tyrosine ki…
HMJ22228	58220	FBgn0035708	axed	axundead	Insufficient genetic data for FlyBase to solicit a summary. [Date last reviewed: 2016-06-30]	-	-	-
HMJ23888	62434	FBgn0026597	Axn	Axin	Axin (Axn) is the key scaffolding protein for the canonical Wnt signalling pathway. In the absence of signal, Axin targets arm for proteolysis inhibiting Wnt signalling. In the presence of signal, it forms a part of the membrane activation complex, disrupting arm degradation. This pathway play roles in cell proliferation (imaginal disc), differentiation (embryonic patterning), death and stemness.…	negative regulation of canonical Wnt signaling pathway ; GO:0090090 | inferred from genetic interaction with pan chitin-based larval cuticle pattern formation ; GO:0035293 | inferred from mutant phenotype somatic stem cell population maintenance ; GO:0035019 | inferred from mutant phenotype eye-antennal disc morphogenesis ; GO:0007455 | inferred from mutant phenotype segment polarity determinatio…	plasma membrane ; GO:0005886 | inferred from direct assay cytoplasm ; GO:0005737 | inferred from direct assay beta-catenin destruction complex ; GO:0030877 | inferred from direct assay nucleus ; GO:0005634 | inferred from direct assay	receptor signaling complex scaffold activity ; GO:0030159 | inferred from electronic annotation with InterPro:IPR029797 signaling receptor binding ; GO:0005102 | inferred from physical interaction with arr beta-catenin binding ; GO:0008013 | inferred from physical interaction with arm protein-containing complex scaffold activity ; GO:0032947 | inferred from genetic interaction with sgg, CkIÎ± pro…
HMC04716	57410	FBgn0004870	bab1	bric a brac 1	Bric a brac 1 (Bab1) is a transcriptional regulator that functions partially redundantly with bab2. Bab1 is part of the conserved proximal-distal gene regulatory network module. Bab1 contributes to pattern formation, ovary morphogenesis, abdominal pigmentation and olfactory receptor neuron fate diversity. [Date last reviewed: 2016-06-23]	female sex differentiation ; GO:0046660 | traceable author statement sex differentiation ; GO:0007548 | traceable author statement eye-antennal disc morphogenesis ; GO:0007455 | inferred from expression pattern transcription, DNA-templated ; GO:0006351 | traceable author statement sex-specific pigmentation ; GO:0048071 | traceable author statement regulation of developmental pigmentation ; GO:004…	nucleus ; GO:0005634 | inferred from biological aspect of ancestor with PANTHER:PTN001135010 nucleus ; GO:0005634 | inferred from direct assay	DNA-binding transcription factor activity ; GO:0003700 | traceable author statement AT DNA binding ; GO:0003680 | inferred from direct assay protein binding ; GO:0005515 | inferred from physical interaction with bip2
HMS00195	36108	FBgn0031977	baf	barrier to autointegration factor	-	oocyte karyosome formation ; GO:0030717 | inferred from mutant phenotype chromosome condensation ; GO:0030261 | inferred from mutant phenotype inferred from genetic interaction with ball	nucleoplasm ; GO:0005654 | inferred from direct assay cytoplasm ; GO:0005737 | inferred from direct assay nuclear envelope ; GO:0005635 | inferred from direct assay	DNA binding ; GO:0003677 | inferred from electronic annotation with InterPro:IPR004122
HMJ22155	58178	FBgn0000158	bam	bag of marbles	Bag of marbles (bam) is a protein involved in gametogenesis. It contributes to the fate determination of germline stem cells, in which bam is negatively regulated by the BMP signaling pathway. It is associated with the fusome, a germ cell-specific organelle. [Date last reviewed: 2016-06-23]	fusome organization ; GO:0045478 | inferred from mutant phenotype oogenesis ; GO:0048477 | inferred from mutant phenotype spermatogonial cell division ; GO:0007284 | inferred from mutant phenotype cystoblast division ; GO:0007282 | traceable author statement germarium-derived female germ-line cyst formation ; GO:0030727 | inferred from mutant phenotype cell competition in a multicellular organism…	cytoplasm ; GO:0005737 | traceable author statement cytoplasm ; GO:0005737 | inferred from direct assay spectrosome ; GO:0045170 | inferred from direct assay fusome ; GO:0045169 | traceable author statement fusome ; GO:0045169 | inferred from direct assay	mRNA 3'-UTR binding ; GO:0003730 | inferred from direct assay translation repressor activity, mRNA regulatory element binding ; GO:0000900 | inferred from direct assay
HMJ02069	42504	FBgn0037081	barc	barricade	-	positive regulation of RNA splicing ; GO:0033120 | inferred from mutant phenotype regulation of neurogenesis ; GO:0050767 | inferred from mutant phenotype mRNA splicing, via spliceosome ; GO:0000398 | inferred from electronic annotation with InterPro:IPR034392	U2 snRNP ; GO:0005686 | inferred from biological aspect of ancestor with PANTHER:PTN000401295 U2-type spliceosomal complex ; GO:0005684 | inferred from biological aspect of ancestor with PANTHER:PTN000401295	nucleic acid binding ; GO:0003676 | inferred from electronic annotation with InterPro:IPR000504, InterPro:IPR035979 U2 snRNP binding ; GO:1990447 | inferred from direct assay mRNA binding ; GO:0003729 | inferred from sequence or structural similarity
HMC04797	57484	FBgn0039071	bb8	big bubble 8	Insufficient genetic data for FlyBase to solicit a summary. [Date last reviewed: 2016-06-30]	oxidation-reduction process ; GO:0055114 | inferred from electronic annotation with InterPro:IPR006095, InterPro:IPR006096, InterPro:IPR006097, InterPro:IPR014362 mitochondrion organization ; GO:0007005 | inferred from mutant phenotype glutamate catabolic process to 2-oxoglutarate ; GO:0019551 | inferred from sequence or structural similarity with UniProt:P49448 inferred from sequence or structur…	mitochondrion ; GO:0005739 | inferred from direct assay mitochondrial matrix ; GO:0005759 | inferred from sequence or structural similarity with UniProt:P49448 inferred from sequence or structural similarity with UniProtKB:P00367	glutamate dehydrogenase [NAD(P)+] activity ; GO:0004353 | inferred from sequence or structural similarity with UniProt:P49448 inferred from sequence or structural similarity with UniProtKB:P00367
HMJ22596	60379	FBgn0039558	BCAS2	BCAS2	BCAS2 (BCAS2) encodes an essential protein that regulates wing development via Delta-Notch signaling. [Date last reviewed: 2018-11-08]	mRNA processing ; GO:0006397 | inferred from mutant phenotype mRNA splicing, via spliceosome ; GO:0000398 | inferred by curator from GO:0071011,GO:0071013	Prp19 complex ; GO:0000974 | inferred from direct assay catalytic step 2 spliceosome ; GO:0071013 | inferred from high throughput direct assay Prp19 complex ; GO:0000974 | inferred from biological aspect of ancestor with PANTHER:PTN000329185 precatalytic spliceosome ; GO:0071011 | inferred from high throughput direct assay	molecular_function ; GO:0003674 | no biological data available
HMJ21248	53915	FBgn0032512	Bdp1	B double prime 1	Insufficient genetic data for FlyBase to solicit a summary. [Date last reviewed: 2016-06-30]	RNA polymerase III preinitiation complex assembly ; GO:0070898 | inferred from biological aspect of ancestor with PANTHER:PTN000532088	transcription factor TFIIIB complex ; GO:0000126 | inferred from biological aspect of ancestor with PANTHER:PTN000532088 transcription factor TFIIIB complex ; GO:0000126 | inferred from direct assay	RNA polymerase III general transcription initiation factor activity ; GO:0000995 | inferred from electronic annotation with InterPro:IPR030701 TFIIIC-class transcription factor complex binding ; GO:0001156 | inferred from biological aspect of ancestor with PANTHER:PTN000532088 RNA polymerase III type 3 promoter sequence-specific DNA binding ; GO:0001006 | inferred from direct assay
HMC03533	53306	FBgn0037660	beag	beag	beag (beag) encodes a spliceosomal protein required for normal neuromuscular junction development and function. It functions together with the product of Smu1 and can regulate the alternative mRNA splicing of Fas2. [Date last reviewed: 2018-11-15]	mitotic spindle assembly checkpoint ; GO:0007094 | inferred from electronic annotation with InterPro:IPR039896 mRNA splicing, via spliceosome ; GO:0000398 | inferred by curator from GO:0071011,GO:0071013 terminal button organization ; GO:0072553 | inferred from mutant phenotype neuromuscular junction development ; GO:0007528 | inferred from mutant phenotype neuromuscular synaptic transmission ; G…	catalytic step 2 spliceosome ; GO:0071013 | inferred from high throughput direct assay nucleus ; GO:0005634 | inferred from direct assay precatalytic spliceosome ; GO:0071011 | inferred from high throughput direct assay	molecular_function ; GO:0003674 | no biological data available
HMC05060	60067	FBgn0038084	beat-Vc	beaten path Vc	Insufficient genetic data for FlyBase to solicit a summary. [Date last reviewed: 2016-06-30]	motor neuron axon guidance ; GO:0008045 | inferred from biological aspect of ancestor with PANTHER:PTN000479519 heterophilic cell-cell adhesion via plasma membrane cell adhesion molecules ; GO:0007157 | inferred from sequence or structural similarity with beat-Ic	-	molecular_function ; GO:0003674 | no biological data available
HMS02490	42654	FBgn0035696	Best2	Bestrophin 2	Insufficient genetic data for FlyBase to solicit a summary. [Date last reviewed: 2016-06-30]	chloride transport ; GO:0006821 | inferred from sequence or structural similarity with Best1	integral component of plasma membrane ; GO:0005887 | inferred from sequence or structural similarity with Best1 peroxisome ; GO:0005777 | inferred from direct assay chloride channel complex ; GO:0034707 | inferred from biological aspect of ancestor with PANTHER:PTN002473291	chloride channel activity ; GO:0005254 | inferred from biological aspect of ancestor with PANTHER:PTN002473291 chloride channel activity ; GO:0005254 | inferred from sequence or structural similarity with Best1
HMS01909	38993	FBgn0260860	Bet5	Blocked early in transport 5	Insufficient genetic data for FlyBase to solicit a summary. [Date last reviewed: 2016-06-30]	endoplasmic reticulum to Golgi vesicle-mediated transport ; GO:0006888 | inferred from biological aspect of ancestor with PANTHER:PTN000583159 endoplasmic reticulum to Golgi vesicle-mediated transport ; GO:0006888 | inferred from sequence or structural similarity with SGD:S000004542 vesicle-mediated transport ; GO:0016192 | inferred from sequence or structural similarity	TRAPP complex ; GO:0030008 | inferred from biological aspect of ancestor with PANTHER:PTN000583159 TRAPP complex ; GO:0030008 | inferred from sequence or structural similarity TRAPP complex ; GO:0030008 | inferred from sequence or structural similarity with SGD:S000004542	Rab guanyl-nucleotide exchange factor activity ; GO:0017112 | inferred from biological aspect of ancestor with PANTHER:PTN000583159 Rab guanyl-nucleotide exchange factor activity ; GO:0017112 | contributes_to inferred from sequence or structural similarity with SGD:S000004542
HMJ24156	62916	FBgn0010357	betaTry	betaTrypsin	Î²Trypsin is a putative digestive enzyme with predicted serine-type endopeptidase activity. The gene is highly expressed and enriched in the midgut, an organ involved in digestion. [Date last reviewed: 2016-06-30]	proteolysis ; GO:0006508 | inferred from electronic annotation with InterPro:IPR001254, InterPro:IPR001314, InterPro:IPR018114 proteolysis ; GO:0006508 | inferred from sequence model	cytoplasm ; GO:0005737 | inferred from biological aspect of ancestor with PANTHER:PTN001208729	serine-type endopeptidase activity ; GO:0004252 | inferred from sequence model serine-type endopeptidase activity ; GO:0004252 | inferred from biological aspect of ancestor with PANTHER:PTN001208729
HMS02622	42929	FBgn0000183	BicD	Bicaudal D	Bicaudal D (BicD) is a cytoplasmic protein that links diverse cargo to the dynein/dynactin motor. Cargos like mRNAs, proteins and organelles are transported along microtubules. Through this mechanism BicD controls spatial aspects of gene expression and polarity formation during development. Additionally, it supports physiology of differentiated polar cells and the function of the nervous system. …	oogenesis ; GO:0048477 | inferred from mutant phenotype regulation of endocytosis ; GO:0030100 | inferred from mutant phenotype synaptic vesicle endocytosis ; GO:0048488 | inferred from genetic interaction with EndoA germarium-derived oocyte fate determination ; GO:0007294 | traceable author statement oocyte microtubule cytoskeleton organization ; GO:0016325 | traceable author statement positive …	cytosol ; GO:0005829 | inferred from high throughput direct assay clathrin-coated endocytic vesicle membrane ; GO:0030669 | colocalizes_with inferred from direct assay cytoplasm ; GO:0005737 | inferred from direct assay	cytoskeletal adaptor activity ; GO:0008093 | inferred from electronic annotation with InterPro:IPR018477 dynein complex binding ; GO:0070840 | inferred from electronic annotation with InterPro:IPR018477 Rab GTPase binding ; GO:0017137 | inferred from physical interaction with Rab2 inferred from physical interaction with Rab39 inferred from physical interaction with Rab30 Rab GTPase binding ; GO:0…
HMJ21554	54835	FBgn0036118	Blos2	Biogenesis of lysosome-related organelles complex 1, subunit 2	Insufficient genetic data for FlyBase to solicit a summary. [Date last reviewed: 2016-06-30]	endosomal transport ; GO:0016197 | inferred from biological aspect of ancestor with PANTHER:PTN000839566 lysosome localization ; GO:0032418 | inferred from biological aspect of ancestor with PANTHER:PTN000839566	gamma-tubulin complex ; GO:0000930 | inferred from biological aspect of ancestor with PANTHER:PTN000839566 BLOC-1 complex ; GO:0031083 | inferred from sequence or structural similarity with HGNC:20984 BLOC-1 complex ; GO:0031083 | inferred from biological aspect of ancestor with PANTHER:PTN000839566 BORC complex ; GO:0099078 | inferred from biological aspect of ancestor with PANTHER:PTN000839566	gamma-tubulin binding ; GO:0043015 | inferred from biological aspect of ancestor with PANTHER:PTN000839566 protein binding ; GO:0005515 | inferred from physical interaction with Snapin protein homodimerization activity ; GO:0042803 | inferred from direct assay
HMC04381	56942	FBgn0032105	borr	borealin-related	Borealin-related is one of the three targeting subunits for aurB kinase in the Chromosomal passenger complex. It helps to target the complex to the centromere region of chromosomes and the cleavage furrow during cytokinesis. At centromeres the complex is involved both in pausing mitotic progression when there are chromosome mis-attachments and in correcting those mis-attachments. At the cleavage …	mitotic cytokinesis ; GO:0000281 | inferred from mutant phenotype mitotic cell cycle, embryonic ; GO:0045448 | inferred from mutant phenotype histone phosphorylation ; GO:0016572 | inferred from mutant phenotype mitotic sister chromatid segregation ; GO:0000070 | inferred from biological aspect of ancestor with PANTHER:PTN001815752 protein localization ; GO:0008104 | inferred from mutant phenotype	spindle midzone ; GO:0051233 | inferred from direct assay chromosome passenger complex ; GO:0032133 | inferred from biological aspect of ancestor with PANTHER:PTN001815752 kinetochore ; GO:0000776 | inferred from direct assay chromosome passenger complex ; GO:0032133 | inferred from direct assay meiotic spindle midzone ; GO:1990385 | inferred from direct assay cell cortex ; GO:0005938 | inferred …	protein binding ; GO:0005515 | inferred from physical interaction with shrb DNA binding ; GO:0003677 | inferred from direct assay
HMC04776	57465	FBgn0265598	Bx	Beadex	Beadex (Bx) is a LIM-only protein that regulates activity of LIM-homeodomain proteins such as ap by binding to form hetero-tetramers (dimer of Bx:ap dimers). Bx regulates ap activity in the wing disc, and presumably other tissues. [Date last reviewed: 2016-06-30]	leg disc development ; GO:0035218 | inferred from mutant phenotype positive regulation of transcription, DNA-templated ; GO:0045893 | inferred from mutant phenotype imaginal disc-derived wing morphogenesis ; GO:0007476 | inferred from mutant phenotype inferred from genetic interaction with ap regulation of Notch signaling pathway ; GO:0008593 | inferred from mutant phenotype chaeta development ; …	nucleus ; GO:0005634 | non-traceable author statement	protein binding ; GO:0005515 | inferred from physical interaction with pnr inferred from physical interaction with chianti
HMS00086	34777	FBgn0004856	Bx42	Bx42	Bx42 is a nuclear protein that acts as a cofactor in Notch signalling pathway. [Date last reviewed: 2017-06-15]	mRNA splicing, via spliceosome ; GO:0000398 | inferred from electronic annotation with InterPro:IPR004015, InterPro:IPR017862 mRNA splicing, via spliceosome ; GO:0000398 | inferred by curator from GO:0071011,GO:0071013 embryonic development via the syncytial blastoderm ; GO:0001700 | inferred from mutant phenotype eye-antennal disc development ; GO:0035214 | inferred from mutant phenotype	spliceosomal complex ; GO:0005681 | inferred from electronic annotation with InterPro:IPR004015, InterPro:IPR017862 Prp19 complex ; GO:0000974 | inferred from direct assay catalytic step 2 spliceosome ; GO:0071013 | inferred from high throughput direct assay precatalytic spliceosome ; GO:0071011 | inferred from high throughput direct assay nuclear chromatin ; GO:0000790 | colocalizes_with non-tra…	protein binding ; GO:0005515 | inferred from physical interaction with asf1
HMS00196	34876	FBgn0010292	bys	by S6	Insufficient genetic data for FlyBase to solicit a summary. [Date last reviewed: 2016-06-30]	rRNA processing ; GO:0006364 | inferred from biological aspect of ancestor with PANTHER:PTN000302374	cytoplasm ; GO:0005737 | inferred from biological aspect of ancestor with PANTHER:PTN000302374 nucleolus ; GO:0005730 | inferred from biological aspect of ancestor with PANTHER:PTN000302374 nucleus ; GO:0005634 | inferred from direct assay preribosome, small subunit precursor ; GO:0030688 | inferred from biological aspect of ancestor with PANTHER:PTN000302374 nucleus ; GO:0005634 | inferred from …	snoRNA binding ; GO:0030515 | inferred from biological aspect of ancestor with PANTHER:PTN000302374
HMS01431	35018	FBgn0004863	C15	C15	-	chaeta development ; GO:0022416 | inferred from mutant phenotype imaginal disc-derived leg morphogenesis ; GO:0007480 | inferred from mutant phenotype elongation of arista core ; GO:0035015 | inferred from mutant phenotype negative regulation of transcription, DNA-templated ; GO:0045892 | inferred from mutant phenotype positive regulation of transcription, DNA-templated ; GO:0045893 | inferred fr…	protein-containing complex ; GO:0032991 | inferred from physical interaction with al	sequence-specific DNA binding ; GO:0043565 | contributes_to inferred from physical interaction with al
HMS02664	43292	FBgn0259822	Ca-beta	Ca2+-channel-protein-beta-subunit	Insufficient genetic data for FlyBase to solicit a summary. [Date last reviewed: 2016-06-30]	calcium-mediated signaling ; GO:0019722 | inferred from mutant phenotype neuromuscular junction development ; GO:0007528 | inferred from biological aspect of ancestor with PANTHER:PTN000930213 regulation of voltage-gated calcium channel activity ; GO:1901385 | inferred from biological aspect of ancestor with PANTHER:PTN000930213 neuron remodeling ; GO:0016322 | inferred from mutant phenotype chem…	voltage-gated calcium channel complex ; GO:0005891 | inferred from biological aspect of ancestor with PANTHER:PTN000930213 voltage-gated calcium channel complex ; GO:0005891 | traceable author statement	voltage-gated calcium channel activity ; GO:0005245 | inferred from mutant phenotype high voltage-gated calcium channel activity ; GO:0008331 | inferred from biological aspect of ancestor with PANTHER:PTN000930213
HMS02380	41982	FBgn0015609	CadN	Cadherin-N	-	R7 cell development ; GO:0045467 | inferred from mutant phenotype axon extension ; GO:0048675 | inferred from mutant phenotype axon guidance ; GO:0007411 | inferred from mutant phenotype homophilic cell adhesion via plasma membrane adhesion molecules ; GO:0007156 | inferred from sequence or structural similarity homophilic cell adhesion via plasma membrane adhesion molecules ; GO:0007156 | inferr…	integral component of plasma membrane ; GO:0005887 | inferred from sequence or structural similarity cell-cell junction ; GO:0005911 | inferred from direct assay plasma membrane ; GO:0005886 | inferred from sequence or structural similarity with shg integral component of membrane ; GO:0016021 | inferred from sequence or structural similarity with MGI:MGI:88355 plasma membrane ; GO:0005886 | infer…	beta-catenin binding ; GO:0008013 | non-traceable author statement cadherin binding ; GO:0045296 | inferred from physical interaction with CadN protein homodimerization activity ; GO:0042803 | inferred from physical interaction with CadN protein binding ; GO:0005515 | inferred from physical interaction with UniProtKB:P18824-2 calcium ion binding ; GO:0005509 | inferred from direct assay
HMS00051	34069	FBgn0263979	Caf1-55	Chromatin assembly factor 1, p55 subunit	Chromatin assembly factor 1, p55 subunit (Caf1-55) encodes a subunit of the MuvB core complex. The MuvB core binds to the oncoprotein encoded by Myb and the Rbf-E2f2-Dp tumor suppressor complex, thereby controlling the expression of many genes, including critical regulators of the cell cycle. [Date last reviewed: 2018-10-18]	histone acetylation ; GO:0016573 | inferred from sequence or structural similarity with SGD:S000000782 inferred from direct assay nucleosome mobilization ; GO:0042766 | inferred from direct assay histone methylation ; GO:0016571 | inferred from direct assay regulation of histone H3-K27 methylation ; GO:0061085 | NOT inferred from mutant phenotype positive regulation of cell population proliferati…	Myb complex ; GO:0031523 | inferred from direct assay NuRD complex ; GO:0016581 | inferred from direct assay nucleus ; GO:0005634 | inferred from direct assay ACF complex ; GO:0016590 | NOT inferred from direct assay histone methyltransferase complex ; GO:0035097 | inferred from physical interaction with ash1, MRG15 NURF complex ; GO:0016589 | traceable author statement histone methyltransferase …	protein homodimerization activity ; GO:0042803 | inferred from physical interaction with Caf1-55 histone binding ; GO:0042393 | traceable author statement histone methyltransferase activity ; GO:0042054 | contributes_to inferred from direct assay histone acetyltransferase binding ; GO:0035035 | inferred from sequence or structural similarity with SGD:S000000782 nucleosome-dependent ATPase activit…
HMC04109	56888	FBgn0262166	calypso	calypso	-	ubiquitin-dependent protein catabolic process ; GO:0006511 | inferred from electronic annotation with InterPro:IPR001578 monoubiquitinated histone H2A deubiquitination ; GO:0035522 | inferred from direct assay protein deubiquitination ; GO:0016579 | inferred from biological aspect of ancestor with PANTHER:PTN000063280 specification of segmental identity, abdomen ; GO:0007385 | inferred from mutan…	PR-DUB complex ; GO:0035517 | inferred from direct assay inferred from physical interaction with Asx nuclear chromatin ; GO:0000790 | inferred from direct assay nucleus ; GO:0005634 | inferred from direct assay cytoplasm ; GO:0005737 | inferred from biological aspect of ancestor with PANTHER:PTN000063280	thiol-dependent ubiquitinyl hydrolase activity ; GO:0036459 | inferred from mutant phenotype thiol-dependent ubiquitin-specific protease activity ; GO:0004843 | inferred from biological aspect of ancestor with PANTHER:PTN000063280 chromatin binding ; GO:0003682 | inferred from direct assay thiol-dependent ubiquitin-specific protease activity ; GO:0004843 | inferred from direct assay
HMS02476	42640	FBgn0040233	cana	CENP-ana	-	microtubule-based movement ; GO:0007018 | inferred from biological aspect of ancestor with PANTHER:PTN000648413 mitotic metaphase plate congression ; GO:0007080 | inferred from biological aspect of ancestor with PANTHER:PTN001947122 microtubule-based movement ; GO:0007018 | inferred from sequence or structural similarity metaphase/anaphase transition of mitotic cell cycle ; GO:0007091 | inferred …	kinesin complex ; GO:0005871 | inferred from biological aspect of ancestor with PANTHER:PTN000648413 kinesin complex ; GO:0005871 | inferred from sequence or structural similarity microtubule ; GO:0005874 | inferred from biological aspect of ancestor with PANTHER:PTN000648413	ATP binding ; GO:0005524 | inferred from electronic annotation with InterPro:IPR001752, InterPro:IPR019821 microtubule binding ; GO:0008017 | inferred from biological aspect of ancestor with PANTHER:PTN000648413 ATP-dependent microtubule motor activity, plus-end-directed ; GO:0008574 | inferred from sequence or structural similarity with HGNC:1856 ATPase activity ; GO:0016887 | inferred from biol…
HMS02476	42640	FBgn0040233	cana	CENP-ana	-	microtubule-based movement ; GO:0007018 | inferred from biological aspect of ancestor with PANTHER:PTN000648413 mitotic metaphase plate congression ; GO:0007080 | inferred from biological aspect of ancestor with PANTHER:PTN001947122 microtubule-based movement ; GO:0007018 | inferred from sequence or structural similarity metaphase/anaphase transition of mitotic cell cycle ; GO:0007091 | inferred …	kinesin complex ; GO:0005871 | inferred from biological aspect of ancestor with PANTHER:PTN000648413 kinesin complex ; GO:0005871 | inferred from sequence or structural similarity microtubule ; GO:0005874 | inferred from biological aspect of ancestor with PANTHER:PTN000648413	ATP binding ; GO:0005524 | inferred from electronic annotation with InterPro:IPR001752, InterPro:IPR019821 microtubule binding ; GO:0008017 | inferred from biological aspect of ancestor with PANTHER:PTN000648413 ATP-dependent microtubule motor activity, plus-end-directed ; GO:0008574 | inferred from sequence or structural similarity with HGNC:1856 ATPase activity ; GO:0016887 | inferred from biol…
HMS02742	44027	FBgn0034068	casp	caspar	Caspar inhibits the immune deficiency pathway, but not the Toll pathway, by blocking Dredd-dependent cleavage and nuclear translocation of Rel. [Date last reviewed: 2016-08-18]	cell death ; GO:0008219 | inferred from electronic annotation with InterPro:IPR033043 negative regulation of peptidoglycan recognition protein signaling pathway ; GO:0061060 | inferred from mutant phenotype negative regulation of proteolysis ; GO:0045861 | inferred from mutant phenotype negative regulation of biosynthetic process of antibacterial peptides active against Gram-negative bacteria ; G…	cytoplasm ; GO:0005737 | inferred from high throughput direct assay cytoplasm ; GO:0005737 | non-traceable author statement	molecular_function ; GO:0003674 | no biological data available
HMS00884	34969	FBgn0015019	CCT3	Chaperonin containing TCP1 subunit 3	-	protein folding ; GO:0006457 | inferred from electronic annotation with InterPro:IPR002194, InterPro:IPR012719 protein folding ; GO:0006457 | inferred from sequence or structural similarity lumen formation, open tracheal system ; GO:0035149 | inferred from high throughput mutant phenotype terminal branching, open tracheal system ; GO:0007430 | inferred from high throughput mutant phenotype	chaperonin-containing T-complex ; GO:0005832 | inferred from biological aspect of ancestor with PANTHER:PTN000143681 chaperonin-containing T-complex ; GO:0005832 | inferred from sequence or structural similarity	ATP binding ; GO:0005524 | inferred from electronic annotation with InterPro:IPR002194, InterPro:IPR002423, InterPro:IPR012719 unfolded protein binding ; GO:0051082 | inferred from electronic annotation with InterPro:IPR002194, InterPro:IPR012719 ATPase activity, coupled ; GO:0042623 | inferred from sequence or structural similarity
HMC04732	57425	FBgn0265574	Cdc5	Cell division cycle 5	Insufficient genetic data for FlyBase to solicit a summary. [Date last reviewed: 2016-06-30]	mRNA splicing, via spliceosome ; GO:0000398 | inferred from sequence or structural similarity with SGD:S000004826 inferred from sequence or structural similarity with protein_id:AAB61210 mRNA splicing, via spliceosome ; GO:0000398 | inferred by curator from GO:0071011,GO:0071013	spliceosomal complex ; GO:0005681 | inferred from sequence or structural similarity with SGD:S000004826 inferred from sequence or structural similarity with protein_id:AAB61210 catalytic step 2 spliceosome ; GO:0071013 | inferred from high throughput direct assay Prp19 complex ; GO:0000974 | inferred from direct assay precatalytic spliceosome ; GO:0071011 | inferred from high throughput direct as…	DNA binding ; GO:0003677 | inferred from electronic annotation with InterPro:IPR009057 RNA binding ; GO:0003723 | inferred from sequence or structural similarity with HGNC:1743
HMS02212	40950	FBgn0004106	Cdk1	Cyclin-dependent kinase 1	Cyclin-dependent kinase (Cdk1) is a catalytic protein kinase subunit that can only become active after association with either CycA, CycB or CycB3. The protein kinase activities of these complexes (CycA-Cdk1, CycB-Cdk1, CycB3-Cdk1) control important aspects of progression through the cell cycle. Functionally, the different Cdk1 complexes are partially redundant. They phosphorylate hundreds of tar…	protein phosphorylation ; GO:0006468 | inferred from direct assay germarium-derived cystoblast division ; GO:0048142 | inferred from mutant phenotype mitotic cell cycle phase transition ; GO:0044772 | inferred from biological aspect of ancestor with PANTHER:PTN002373207 G2/M transition of mitotic cell cycle ; GO:0000086 | inferred from mutant phenotype asymmetric neuroblast division ; GO:0055059 …	mitotic spindle ; GO:0072686 | inferred from biological aspect of ancestor with PANTHER:PTN002373207 cytoplasm ; GO:0005737 | inferred from biological aspect of ancestor with PANTHER:PTN002373207 nucleus ; GO:0005634 | inferred from biological aspect of ancestor with PANTHER:PTN000623091	ATP binding ; GO:0005524 | inferred from electronic annotation with InterPro:IPR000719, InterPro:IPR002290, InterPro:IPR017441 cyclin-dependent protein serine/threonine kinase activity ; GO:0004693 | inferred from sequence or structural similarity with SGD:S000000364 inferred from genetic interaction with SGD:S000000364 protein binding ; GO:0005515 | inferred from physical interaction with UniPro…
HMS00155	34838	FBgn0037093	Cdk12	Cyclin-dependent kinase 12	Insufficient genetic data for FlyBase to solicit a summary. [Date last reviewed: 2016-06-30]	phosphorylation of RNA polymerase II C-terminal domain ; GO:0070816 | inferred from biological aspect of ancestor with PANTHER:PTN000623455 inferred from biological aspect of ancestor with PANTHER:PTN001936021 phosphorylation of RNA polymerase II C-terminal domain ; GO:0070816 | inferred from direct assay positive regulation of transcription elongation from RNA polymerase II promoter ; GO:0032968…	polytene chromosome puff ; GO:0005703 | inferred from direct assay nuclear chromosome ; GO:0000228 | inferred from direct assay nucleus ; GO:0005634 | inferred from biological aspect of ancestor with PANTHER:PTN000623091 chromosome ; GO:0005694 | inferred from biological aspect of ancestor with PANTHER:PTN000623455 polytene chromosome ; GO:0005700 | inferred from direct assay nuclear chromatin ; …	ATP binding ; GO:0005524 | inferred from electronic annotation with InterPro:IPR000719, InterPro:IPR002290, InterPro:IPR017441 RNA polymerase II CTD heptapeptide repeat kinase activity ; GO:0008353 | inferred from biological aspect of ancestor with PANTHER:PTN000623455 inferred from biological aspect of ancestor with PANTHER:PTN001936021 cyclin binding ; GO:0030332 | inferred from biological aspe…
HMS00174	34856	FBgn0004107	Cdk2	Cyclin-dependent kinase 2	Cyclin-dependent kinase 2 (Cdk2) is a catalytic protein kinase subunit that can only become active after association with CycE. The protein kinase activity of the CycE-Cdk2 complex controls important aspects of progression through the G1 and S phases of the cell cycle. In addition, periodic CycE-Cdk2 activity regulates progression through endoreduplication cycles. [Date last reviewed: 2016-06-23]	protein phosphorylation ; GO:0006468 | inferred from sequence or structural similarity with SGD:S000000364 regulation of G2/M transition of mitotic cell cycle ; GO:0010389 | inferred from biological aspect of ancestor with PANTHER:PTN000623979 positive regulation of cell population proliferation ; GO:0008284 | inferred from biological aspect of ancestor with PANTHER:PTN000623979 G2/M transition o…	cyclin-dependent protein kinase holoenzyme complex ; GO:0000307 | inferred from biological aspect of ancestor with PANTHER:PTN000623979 nucleus ; GO:0005634 | inferred from biological aspect of ancestor with PANTHER:PTN000623091 cytoplasm ; GO:0005737 | inferred from biological aspect of ancestor with PANTHER:PTN000623979	ATP binding ; GO:0005524 | inferred from electronic annotation with InterPro:IPR000719, InterPro:IPR002290, InterPro:IPR017441 cyclin-dependent protein serine/threonine kinase activity ; GO:0004693 | inferred from sequence or structural similarity with SGD:S000000364 cyclin-dependent protein serine/threonine kinase activity ; GO:0004693 | inferred from biological aspect of ancestor with PANTHER:P…
HMS01391	34982	FBgn0019949	Cdk9	Cyclin-dependent kinase 9	Cyclin-dependent kinase 9 (Cdk9) is a cyclin dependent kinase that along with CycT forms the positive transcription elongation factor, P-TEFb, involved in RNA polymerase II elongation control. [Date last reviewed: 2016-09-01]	protein phosphorylation ; GO:0006468 | inferred from sequence or structural similarity with SGD:S000001622 positive regulation of transcription by RNA polymerase II ; GO:0045944 | inferred from biological aspect of ancestor with PANTHER:PTN000623455 phosphorylation of RNA polymerase II C-terminal domain ; GO:0070816 | inferred from biological aspect of ancestor with PANTHER:PTN000623455 inferred …	nucleus ; GO:0005634 | inferred from direct assay polytene chromosome puff ; GO:0005703 | inferred from direct assay ELL-EAF complex ; GO:0032783 | inferred from physical interaction with Su(Tpl) polytene chromosome ; GO:0005700 | inferred from direct assay chromosome ; GO:0005694 | inferred from biological aspect of ancestor with PANTHER:PTN000623455 cyclin/CDK positive transcription elongation …	ATP binding ; GO:0005524 | inferred from electronic annotation with InterPro:IPR000719, InterPro:IPR002290, InterPro:IPR017441 transcription factor binding ; GO:0008134 | inferred from biological aspect of ancestor with PANTHER:PTN000623455 RNA polymerase II CTD heptapeptide repeat kinase activity ; GO:0008353 | inferred from direct assay protein serine/threonine kinase activity ; GO:0004674 | no…
HMS02554	42862	FBgn0026141	Cdlc2	Cytoplasmic dynein light chain 2	Insufficient genetic data for FlyBase to solicit a summary. [Date last reviewed: 2016-06-30]	microtubule-based process ; GO:0007017 | inferred from electronic annotation with InterPro:IPR001372, InterPro:IPR019763, InterPro:IPR037177 positive regulation of ATP-dependent microtubule motor activity, plus-end-directed ; GO:2000582 | inferred from biological aspect of ancestor with PANTHER:PTN000223361 microtubule-based movement ; GO:0007018 | inferred from sequence or structural similarity	cytoplasmic dynein complex ; GO:0005868 | inferred from biological aspect of ancestor with PANTHER:PTN000223362 dynein complex ; GO:0030286 | inferred from sequence or structural similarity dynein complex ; GO:0030286 | inferred from biological aspect of ancestor with PANTHER:PTN000223361	ATP-dependent microtubule motor activity, plus-end-directed ; GO:0008574 | contributes_to inferred from biological aspect of ancestor with PANTHER:PTN000223361 dynein light intermediate chain binding ; GO:0051959 | inferred from biological aspect of ancestor with PANTHER:PTN000223361 ATPase activity, coupled ; GO:0042623 | inferred from sequence or structural similarity dynein intermediate chain …
HMS02554	42862	FBgn0026141	Cdlc2	Cytoplasmic dynein light chain 2	Insufficient genetic data for FlyBase to solicit a summary. [Date last reviewed: 2016-06-30]	microtubule-based process ; GO:0007017 | inferred from electronic annotation with InterPro:IPR001372, InterPro:IPR019763, InterPro:IPR037177 positive regulation of ATP-dependent microtubule motor activity, plus-end-directed ; GO:2000582 | inferred from biological aspect of ancestor with PANTHER:PTN000223361 microtubule-based movement ; GO:0007018 | inferred from sequence or structural similarity	cytoplasmic dynein complex ; GO:0005868 | inferred from biological aspect of ancestor with PANTHER:PTN000223362 dynein complex ; GO:0030286 | inferred from sequence or structural similarity dynein complex ; GO:0030286 | inferred from biological aspect of ancestor with PANTHER:PTN000223361	ATP-dependent microtubule motor activity, plus-end-directed ; GO:0008574 | contributes_to inferred from biological aspect of ancestor with PANTHER:PTN000223361 dynein light intermediate chain binding ; GO:0051959 | inferred from biological aspect of ancestor with PANTHER:PTN000223361 ATPase activity, coupled ; GO:0042623 | inferred from sequence or structural similarity dynein intermediate chain …
HMS02846	44551	FBgn0261532	cdm	cadmus	Cadmus (Cdm) is a member of the importin beta family of nucleocytoplasmic cargo shuttling proteins. It functions at the neuromuscular junction to maintain normal subsynaptic reticulum structure and presynaptic probability of release. [Date last reviewed: 2017-01-12]	neuron-neuron synaptic transmission ; GO:0007270 | inferred from mutant phenotype phototaxis ; GO:0042331 | inferred from mutant phenotype protein import into nucleus ; GO:0006606 | inferred from biological aspect of ancestor with PANTHER:PTN000270925 modulation of chemical synaptic transmission ; GO:0050804 | inferred from mutant phenotype	cytoplasm ; GO:0005737 | inferred from biological aspect of ancestor with PANTHER:PTN000270925	Ran GTPase binding ; GO:0008536 | inferred from electronic annotation with InterPro:IPR001494 protein transporter activity ; GO:0008565 | inferred from biological aspect of ancestor with PANTHER:PTN000270925
HMS02947	50713	FBgn0032799	CG10166	-	Insufficient genetic data for FlyBase to solicit a summary. [Date last reviewed: 2016-06-30]	protein O-linked mannosylation ; GO:0035269 | inferred from biological aspect of ancestor with PANTHER:PTN000092440 GPI anchor biosynthetic process ; GO:0006506 | inferred from biological aspect of ancestor with PANTHER:PTN000092440 protein glycosylation ; GO:0006486 | inferred from sequence or structural similarity with SGD:S000006387 dolichol metabolic process ; GO:0019348 | inferred from biolo…	endoplasmic reticulum membrane ; GO:0005789 | inferred from biological aspect of ancestor with PANTHER:PTN000092441	dolichyl-phosphate beta-D-mannosyltransferase activity ; GO:0004582 | inferred from biological aspect of ancestor with PANTHER:PTN002459128 dolichyl-phosphate beta-D-mannosyltransferase activity ; GO:0004582 | inferred from sequence or structural similarity with SGD:S000006387
HMC04647	57255	FBgn0033971	CG10209	-	CG10209 is a DNA binding nuclear apoptosis-inducing factor involved in the apoptotic process. [Date last reviewed: 2016-06-23]	apoptotic process ; GO:0006915 | inferred from electronic annotation with InterPro:IPR026753	nucleus ; GO:0005634 | inferred from biological aspect of ancestor with PANTHER:PTN001134050	DNA binding ; GO:0003677 | inferred from electronic annotation with InterPro:IPR004210
HMC03933	55746	FBgn0036277	CG10418	-	Insufficient genetic data for FlyBase to solicit a summary. [Date last reviewed: 2016-06-30]	mRNA splicing, via spliceosome ; GO:0000398 | inferred from sequence or structural similarity with SGD:S000000122 inferred from sequence or structural similarity with protein_id:AAD56226 mRNA splicing, via spliceosome ; GO:0000398 | inferred by curator from GO:0071011,GO:0071013 regulation of alternative mRNA splicing, via spliceosome ; GO:0000381 | inferred from high throughput mutant phenotype	catalytic step 2 spliceosome ; GO:0071013 | inferred from biological aspect of ancestor with PANTHER:PTN000352619 precatalytic spliceosome ; GO:0071011 | inferred from high throughput direct assay U6 snRNP ; GO:0005688 | non-traceable author statement U6 snRNP ; GO:0005688 | inferred from biological aspect of ancestor with PANTHER:PTN000352619 Lsm1-7-Pat1 complex ; GO:1990726 | inferred from biol…	RNA binding ; GO:0003723 | contributes_to inferred from biological aspect of ancestor with PANTHER:PTN000352619 RNA binding ; GO:0003723 | inferred from sequence or structural similarity with HGNC:13940
HMC03950	55263	FBgn0032822	CG10466	-	Insufficient genetic data for FlyBase to solicit a summary. [Date last reviewed: 2016-06-30]	mRNA splicing, via spliceosome ; GO:0000398 | inferred by curator from GO:0071011,GO:0071013 mRNA splicing, via spliceosome ; GO:0000398 | inferred from biological aspect of ancestor with PANTHER:PTN000567094	precatalytic spliceosome ; GO:0071011 | inferred from high throughput direct assay U2 snRNP ; GO:0005686 | inferred from biological aspect of ancestor with PANTHER:PTN000567094 catalytic step 2 spliceosome ; GO:0071013 | inferred from high throughput direct assay	nucleic acid binding ; GO:0003676 | inferred from electronic annotation with InterPro:IPR000504, InterPro:IPR035979 mRNA binding ; GO:0003729 | inferred from sequence or structural similarity first spliceosomal transesterification activity ; GO:0000384 | contributes_to inferred from biological aspect of ancestor with PANTHER:PTN000567094
HMS01023	34551	FBgn0035649	CG10483	-	-	-	integral component of membrane ; GO:0016021 | inferred from electronic annotation with InterPro:IPR004342 plasma membrane ; GO:0005886 | inferred from biological aspect of ancestor with PANTHER:PTN000081884 Golgi apparatus ; GO:0005794 | inferred from biological aspect of ancestor with PANTHER:PTN000081884	-
HMC03588	53359	FBgn0037039	CG10587	-	-	proteolysis ; GO:0006508 | inferred from electronic annotation with InterPro:IPR001254, InterPro:IPR001314, InterPro:IPR018114 multicellular organism reproduction ; GO:0032504 | inferred from high throughput expression pattern proteolysis ; GO:0006508 | inferred from sequence model	cytoplasm ; GO:0005737 | inferred from biological aspect of ancestor with PANTHER:PTN001208729 extracellular space ; GO:0005615 | inferred from high throughput direct assay	serine-type endopeptidase activity ; GO:0004252 | inferred from biological aspect of ancestor with PANTHER:PTN001208729 serine-type endopeptidase activity ; GO:0004252 | inferred from sequence model
HMJ21664	52977	FBgn0037037	CG10588	-	-	proteolysis ; GO:0006508 | inferred from electronic annotation with InterPro:IPR001431	-	metalloendopeptidase activity ; GO:0004222 | inferred from electronic annotation with InterPro:IPR001431 metal ion binding ; GO:0046872 | inferred from electronic annotation with InterPro:IPR011237, InterPro:IPR011249
HMJ23930	62451	FBgn0031178	CG10918	-	Insufficient genetic data for FlyBase to solicit a summary. [Date last reviewed: 2016-06-30]	-	extracellular space ; GO:0005615 | inferred from sequence model	-
HMC02379	44650	FBgn0029963	CG10920	-	Insufficient genetic data for FlyBase to solicit a summary. [Date last reviewed: 2016-06-30]	-	-	-
HMJ22058	58121	FBgn0039241	CG11089	-	Insufficient genetic data for FlyBase to solicit a summary. [Date last reviewed: 2016-06-30]	purine nucleotide biosynthetic process ; GO:0006164 | inferred from electronic annotation with InterPro:IPR002695 wound healing ; GO:0042060 | inferred from mutant phenotype	-	IMP cyclohydrolase activity ; GO:0003937 | inferred from electronic annotation with InterPro:IPR002695 phosphoribosylaminoimidazolecarboxamide formyltransferase activity ; GO:0004643 | inferred from electronic annotation with InterPro:IPR002695
HMJ22058	58121	FBgn0039241	CG11089	-	Insufficient genetic data for FlyBase to solicit a summary. [Date last reviewed: 2016-06-30]	purine nucleotide biosynthetic process ; GO:0006164 | inferred from electronic annotation with InterPro:IPR002695 wound healing ; GO:0042060 | inferred from mutant phenotype	-	IMP cyclohydrolase activity ; GO:0003937 | inferred from electronic annotation with InterPro:IPR002695 phosphoribosylaminoimidazolecarboxamide formyltransferase activity ; GO:0004643 | inferred from electronic annotation with InterPro:IPR002695
HMJ23541	61956	FBgn0036342	CG11279	-	Insufficient genetic data for FlyBase to solicit a summary. [Date last reviewed: 2016-06-30]	-	-	-
HMJ23644	62287	FBgn0037279	CG1129	-	-	biosynthetic process ; GO:0009058 | inferred from electronic annotation with InterPro:IPR005835 larval lymph gland hemopoiesis ; GO:0035167 | inferred from mutant phenotype	-	nucleotidyltransferase activity ; GO:0016779 | inferred from electronic annotation with InterPro:IPR005835
HMJ22905	61185	FBgn0034990	CG11406	-	-	cellular lipid metabolic process ; GO:0044255 | inferred from biological aspect of ancestor with PANTHER:PTN002591693	-	lipase activity ; GO:0016298 | inferred from biological aspect of ancestor with PANTHER:PTN002591693
HMJ23939	62459	FBgn0037504	CG1142	-	Insufficient genetic data for FlyBase to solicit a summary. [Date last reviewed: 2016-06-30]	biological_process ; GO:0008150 | no biological data available	nucleus ; GO:0005634 | inferred from sequence or structural similarity with HGNC:24013	RNA binding ; GO:0003723 | inferred from sequence or structural similarity with HGNC:24013
HMS02625	42932	FBgn0039627	CG11837	-	Insufficient genetic data for FlyBase to solicit a summary. [Date last reviewed: 2016-06-30]	rRNA methylation ; GO:0031167 | inferred from biological aspect of ancestor with PANTHER:PTN000197843	mitochondrial matrix ; GO:0005759 | inferred from biological aspect of ancestor with PANTHER:PTN000197847	rRNA (adenine-N6,N6-)-dimethyltransferase activity ; GO:0000179 | inferred from biological aspect of ancestor with PANTHER:PTN000197843
HMS00178	34860	FBgn0039274	CG11920	-	Insufficient genetic data for FlyBase to solicit a summary. [Date last reviewed: 2016-06-30]	rRNA processing ; GO:0006364 | inferred from biological aspect of ancestor with PANTHER:PTN000506776	Mpp10 complex ; GO:0034457 | inferred from biological aspect of ancestor with PANTHER:PTN000506837 small-subunit processome ; GO:0032040 | inferred from biological aspect of ancestor with PANTHER:PTN000506837 nucleolus ; GO:0005730 | inferred from high throughput direct assay nucleolus ; GO:0005730 | inferred from biological aspect of ancestor with PANTHER:PTN000506776 nucleoplasm ; GO:0005654 | …	snoRNA binding ; GO:0030515 | inferred from biological aspect of ancestor with PANTHER:PTN000506837
HMS01025	34553	FBgn0043458	CG12084	-	-	-	Cul2-RING ubiquitin ligase complex ; GO:0031462 | inferred from biological aspect of ancestor with PANTHER:PTN000985199 Cul2-RING ubiquitin ligase complex ; GO:0031462 | inferred from sequence or structural similarity with UniProtKB:Q7Z7L7	-
HMS02404	42003	FBgn0030097	CG12115	-	Insufficient genetic data for FlyBase to solicit a summary. [Date last reviewed: 2016-06-30]	biological_process ; GO:0008150 | no biological data available	cellular_component ; GO:0005575 | no biological data available	molecular_function ; GO:0003674 | no biological data available
HMJ23711	62356	FBgn0039557	CG12259	-	-	-	nucleoplasm ; GO:0005654 | inferred from sequence or structural similarity with HGNC:18786	RNA binding ; GO:0003723 | inferred from sequence or structural similarity with HGNC:18786
HMC05222	62215	FBgn0038080	CG12279	-	-	-	-	thiosulfate sulfurtransferase activity ; GO:0004792 | inferred from electronic annotation with InterPro:IPR001307
HMC04702	57398	FBgn0035134	CG1231	-	-	-	nucleus ; GO:0005634 | inferred from electronic annotation with InterPro:IPR000690	zinc ion binding ; GO:0008270 | inferred from electronic annotation with InterPro:IPR000690, InterPro:IPR003604 nucleic acid binding ; GO:0003676 | inferred from electronic annotation with InterPro:IPR000690, InterPro:IPR003604, InterPro:IPR013087
HMC03911	55697	FBgn0033556	CG12343	-	-	mRNA splicing, via spliceosome ; GO:0000398 | inferred by curator from GO:0071011,GO:0071013 mRNA splicing, via spliceosome ; GO:0000398 | inferred from sequence or structural similarity with UniProtKB:O95926	precatalytic spliceosome ; GO:0071011 | inferred from high throughput direct assay Prp19 complex ; GO:0000974 | inferred from biological aspect of ancestor with PANTHER:PTN000327519 post-mRNA release spliceosomal complex ; GO:0071014 | inferred from biological aspect of ancestor with PANTHER:PTN000327519 catalytic step 2 spliceosome ; GO:0071013 | inferred from biological aspect of ancestor with …	RNA binding ; GO:0003723 | inferred from sequence or structural similarity with HGNC:19824
HMC03490	53274	FBgn0037370	CG1236	-	-	oxidation-reduction process ; GO:0055114 | inferred from electronic annotation with InterPro:IPR006139, InterPro:IPR006140	cytosol ; GO:0005829 | inferred from biological aspect of ancestor with PANTHER:PTN000107947	NAD binding ; GO:0051287 | inferred from electronic annotation with InterPro:IPR006139, InterPro:IPR006140 glyoxylate reductase (NADP) activity ; GO:0030267 | inferred from biological aspect of ancestor with PANTHER:PTN000107947 protein homodimerization activity ; GO:0042803 | inferred from biological aspect of ancestor with PANTHER:PTN000107684 oxidoreductase activity, acting on the CH-OH group …
HMS02738	44023	FBgn0037368	CG1239	-	Insufficient genetic data for FlyBase to solicit a summary. [Date last reviewed: 2016-06-30]	snRNA modification ; GO:0040031 | inferred from biological aspect of ancestor with PANTHER:PTN000267972	-	RNA methyltransferase activity ; GO:0008173 | inferred from biological aspect of ancestor with PANTHER:PTN000267975 O-methyltransferase activity ; GO:0008171 | inferred from biological aspect of ancestor with PANTHER:PTN000267975 snRNA binding ; GO:0017069 | inferred from biological aspect of ancestor with PANTHER:PTN000267972
HMS02605	42912	FBgn0037368	CG1239	-	Insufficient genetic data for FlyBase to solicit a summary. [Date last reviewed: 2016-06-30]	snRNA modification ; GO:0040031 | inferred from biological aspect of ancestor with PANTHER:PTN000267972	-	RNA methyltransferase activity ; GO:0008173 | inferred from biological aspect of ancestor with PANTHER:PTN000267975 O-methyltransferase activity ; GO:0008171 | inferred from biological aspect of ancestor with PANTHER:PTN000267975 snRNA binding ; GO:0017069 | inferred from biological aspect of ancestor with PANTHER:PTN000267972
HMC02896	44506	FBgn0037368	CG1239	-	Insufficient genetic data for FlyBase to solicit a summary. [Date last reviewed: 2016-06-30]	snRNA modification ; GO:0040031 | inferred from biological aspect of ancestor with PANTHER:PTN000267972	-	RNA methyltransferase activity ; GO:0008173 | inferred from biological aspect of ancestor with PANTHER:PTN000267975 O-methyltransferase activity ; GO:0008171 | inferred from biological aspect of ancestor with PANTHER:PTN000267975 snRNA binding ; GO:0017069 | inferred from biological aspect of ancestor with PANTHER:PTN000267972
HMJ21621	52952	FBgn0030202	CG12640	-	Insufficient genetic data for FlyBase to solicit a summary. [Date last reviewed: 2016-06-30]	-	-	-
HMS01269	34920	FBgn0031535	CG12795	-	Insufficient genetic data for FlyBase to solicit a summary. [Date last reviewed: 2016-06-30]	-	-	zinc ion binding ; GO:0008270 | inferred from electronic annotation with InterPro:IPR000058
HMJ23318	61835	FBgn0036577	CG13073	-	-	-	-	-
HMS00206	33340	FBgn0032050	CG13096	-	Insufficient genetic data for FlyBase to solicit a summary. [Date last reviewed: 2016-06-30]	maturation of LSU-rRNA ; GO:0000470 | inferred from biological aspect of ancestor with PANTHER:PTN000559990	cytosolic large ribosomal subunit ; GO:0022625 | inferred from biological aspect of ancestor with PANTHER:PTN000559990	RNA binding ; GO:0003723 | inferred from biological aspect of ancestor with PANTHER:PTN000559990
HMJ21825	57817	FBgn0033640	CG13198	-	Insufficient genetic data for FlyBase to solicit a summary. [Date last reviewed: 2016-10-13]	biological_process ; GO:0008150 | no biological data available	cellular_component ; GO:0005575 | no biological data available	molecular_function ; GO:0003674 | no biological data available
HMC04751	57443	FBgn0035643	CG13287	-	Insufficient genetic data for FlyBase to solicit a summary. [Date last reviewed: 2016-06-30]	oligodendrocyte development ; GO:0014003 | inferred from biological aspect of ancestor with PANTHER:PTN000003938 negative regulation of transcription, DNA-templated ; GO:0045892 | inferred from sequence or structural similarity with UniProtKB:Q8BZ97	nucleus ; GO:0005634 | inferred from sequence or structural similarity with UniProtKB:Q8BZ97	nucleic acid binding ; GO:0003676 | inferred from electronic annotation with InterPro:IPR013087 chromatin binding ; GO:0003682 | inferred from sequence or structural similarity with UniProtKB:Q8BZ97 transcription corepressor activity ; GO:0003714 | inferred from sequence or structural similarity with UniProtKB:Q8BZ97
HMC03739	55143	FBgn0037627	CG13318	-	-	proteolysis ; GO:0006508 | inferred from electronic annotation with InterPro:IPR001254, InterPro:IPR001314	-	serine-type endopeptidase activity ; GO:0004252 | NOT inferred from key residues
HMS02644	42951	FBgn0029529	CG13365	-	Insufficient genetic data for FlyBase to solicit a summary. [Date last reviewed: 2016-06-30]	-	-	-
HMJ21188	51053	FBgn0035010	CG13579	-	-	G protein-coupled receptor signaling pathway ; GO:0007186 | inferred from sequence or structural similarity neuropeptide signaling pathway ; GO:0007218 | inferred from biological aspect of ancestor with PANTHER:PTN000660491	integral component of plasma membrane ; GO:0005887 | inferred from biological aspect of ancestor with PANTHER:PTN000660491 integral component of membrane ; GO:0016021 | inferred from sequence or structural similarity	G protein-coupled receptor activity ; GO:0004930 | inferred from sequence or structural similarity G protein-coupled peptide receptor activity ; GO:0008528 | inferred from biological aspect of ancestor with PANTHER:PTN000660491
HMS01845	38376	FBgn0035844	CG13676	-	Insufficient genetic data for FlyBase to solicit a summary. [Date last reviewed: 2016-06-30]	chitin metabolic process ; GO:0006030 | inferred from electronic annotation with InterPro:IPR002557	extracellular region ; GO:0005576 | inferred from electronic annotation with InterPro:IPR002557	chitin binding ; GO:0008061 | inferred from electronic annotation with InterPro:IPR002557
HMJ30043	62966	FBgn0031939	CG13796	-	Insufficient genetic data for FlyBase to solicit a summary. [Date last reviewed: 2016-06-30]	neurotransmitter transport ; GO:0006836 | inferred from sequence or structural similarity with DAT neurotransmitter transport ; GO:0006836 | inferred from sequence model	integral component of membrane ; GO:0016021 | inferred from electronic annotation with InterPro:IPR000175 plasma membrane ; GO:0005886 | inferred from biological aspect of ancestor with PANTHER:PTN000177662 integral component of membrane ; GO:0016021 | inferred from sequence model neuron projection ; GO:0043005 | inferred from biological aspect of ancestor with PANTHER:PTN000177868	neurotransmitter binding ; GO:0042165 | inferred from biological aspect of ancestor with PANTHER:PTN000177868 neurotransmitter transporter activity ; GO:0005326 | inferred from sequence or structural similarity with DAT neurotransmitter:sodium symporter activity ; GO:0005328 | inferred from sequence model gamma-aminobutyric acid:sodium symporter activity ; GO:0005332 | inferred from biological as…
HMJ30043	62966	FBgn0031939	CG13796	-	Insufficient genetic data for FlyBase to solicit a summary. [Date last reviewed: 2016-06-30]	neurotransmitter transport ; GO:0006836 | inferred from sequence or structural similarity with DAT neurotransmitter transport ; GO:0006836 | inferred from sequence model	integral component of membrane ; GO:0016021 | inferred from electronic annotation with InterPro:IPR000175 plasma membrane ; GO:0005886 | inferred from biological aspect of ancestor with PANTHER:PTN000177662 integral component of membrane ; GO:0016021 | inferred from sequence model neuron projection ; GO:0043005 | inferred from biological aspect of ancestor with PANTHER:PTN000177868	neurotransmitter binding ; GO:0042165 | inferred from biological aspect of ancestor with PANTHER:PTN000177868 neurotransmitter transporter activity ; GO:0005326 | inferred from sequence or structural similarity with DAT neurotransmitter:sodium symporter activity ; GO:0005328 | inferred from sequence model gamma-aminobutyric acid:sodium symporter activity ; GO:0005332 | inferred from biological as…
HMC03858	55177	FBgn0031753	CG13999	-	-	cilium assembly ; GO:0060271 | inferred from sequence or structural similarity with HGNC:26944	cilium ; GO:0005929 | inferred from biological aspect of ancestor with PANTHER:PTN000999504 cilium ; GO:0005929 | inferred from sequence or structural similarity with HGNC:26944	molecular_function ; GO:0003674 | no biological data available
HMJ30042	62965	FBgn0036036	CG14174	-	Insufficient genetic data for FlyBase to solicit a summary. [Date last reviewed: 2016-06-30]	positive regulation of Notch signaling pathway ; GO:0045747 | inferred from biological aspect of ancestor with PANTHER:PTN002163932	nucleus ; GO:0005634 | inferred from biological aspect of ancestor with PANTHER:PTN002163932	-
HMC04571	57189	FBgn0037174	CG14457	-	Insufficient genetic data for FlyBase to solicit a summary. [Date last reviewed: 2016-06-30]	-	extracellular space ; GO:0005615 | inferred from biological aspect of ancestor with PANTHER:PTN001663160 extracellular space ; GO:0005615 | inferred from sequence or structural similarity with to	-
HMJ21743	53020	FBgn0037910	CG14708	-	Insufficient genetic data for FlyBase to solicit a summary. [Date last reviewed: 2016-10-13]	biological_process ; GO:0008150 | no biological data available	cellular_component ; GO:0005575 | no biological data available	molecular_function ; GO:0003674 | no biological data available
HMC04937	57744	FBgn0026090	CG14812	-	Insufficient genetic data for FlyBase to solicit a summary. [Date last reviewed: 2016-06-30]	negative regulation of cysteine-type endopeptidase activity involved in apoptotic process ; GO:0043154 | inferred from electronic annotation with InterPro:IPR024135 viral genome replication ; GO:0019079 | inferred from electronic annotation with InterPro:IPR024135 positive regulation of TORC1 signaling ; GO:1904263 | inferred from mutant phenotype cellular response to amino acid stimulus ; GO:007…	Ragulator complex ; GO:0071986 | inferred from electronic annotation with InterPro:IPR024135	-
HMS00376	32384	FBgn0032402	CG14945	-	Insufficient genetic data for FlyBase to solicit a summary. [Date last reviewed: 2016-06-30]	glycerophospholipid metabolic process ; GO:0006650 | inferred from electronic annotation with InterPro:IPR003633	-	phosphoric diester hydrolase activity ; GO:0008081 | inferred from electronic annotation with InterPro:IPR017946 glycosylphosphatidylinositol diacylglycerol-lyase activity ; GO:0047396 | inferred from electronic annotation with InterPro:IPR003633
HMJ23240	61348	FBgn0034331	CG15067	-	Insufficient genetic data for FlyBase to solicit a summary. [Date last reviewed: 2016-06-30]	-	-	-
HMJ22838	60897	FBgn0032625	CG15136	-	Insufficient genetic data for FlyBase to solicit a summary. [Date last reviewed: 2016-10-13]	biological_process ; GO:0008150 | no biological data available	cellular_component ; GO:0005575 | no biological data available	molecular_function ; GO:0003674 | no biological data available
HMJ23231	61339	FBgn0028850	CG15260	-	-	-	-	-
HMJ23639	62282	FBgn0028879	CG15270	-	Insufficient genetic data for FlyBase to solicit a summary. [Date last reviewed: 2016-06-30]	chloride transport ; GO:0006821 | inferred from sequence or structural similarity with UniProtKB:Q9NW15 cation transport ; GO:0006812 | inferred from sequence or structural similarity with HGNC:25519	plasma membrane ; GO:0005886 | inferred from sequence or structural similarity with HGNC:25519	intracellular calcium activated chloride channel activity ; GO:0005229 | inferred from sequence or structural similarity with UniProtKB:Q9NW15 calcium activated cation channel activity ; GO:0005227 | inferred from sequence or structural similarity with HGNC:25519
HMJ23776	62380	FBgn0030260	CG1537	-	Insufficient genetic data for FlyBase to solicit a summary. [Date last reviewed: 2016-06-30]	-	-	-
HMJ21981	58088	FBgn0031603	CG15432	-	-	biological_process ; GO:0008150 | no biological data available	nucleus ; GO:0005634 | inferred from sequence or structural similarity with HGNC:24563 nucleolus ; GO:0005730 | inferred from biological aspect of ancestor with PANTHER:PTN000328467 nucleoplasm ; GO:0005654 | inferred from sequence or structural similarity with HGNC:24563	RNA binding ; GO:0003723 | inferred from sequence or structural similarity with HGNC:24563
HMJ22007	58092	FBgn0039732	CG15525	-	Insufficient genetic data for FlyBase to solicit a summary. [Date last reviewed: 2017-07-13]	biological_process ; GO:0008150 | no biological data available	cellular_component ; GO:0005575 | no biological data available	molecular_function ; GO:0003674 | no biological data available
HMJ23167	61331	FBgn0039806	CG15545	-	Insufficient genetic data for FlyBase to solicit a summary. [Date last reviewed: 2016-10-13]	biological_process ; GO:0008150 | no biological data available	cellular_component ; GO:0005575 | no biological data available	molecular_function ; GO:0003674 | no biological data available
HMC04228	55940	FBgn0030643	CG15641	-	-	multicellular organism reproduction ; GO:0032504 | inferred from high throughput expression pattern	extracellular space ; GO:0005615 | inferred from high throughput direct assay	molecular_function ; GO:0003674 | no biological data available
HMC03934	55747	FBgn0030474	CG15747	-	Insufficient genetic data for FlyBase to solicit a summary. [Date last reviewed: 2016-06-30]	mRNA splicing, via spliceosome ; GO:0000398 | inferred by curator from GO:0071011,GO:0071013	precatalytic spliceosome ; GO:0071011 | inferred from high throughput direct assay catalytic step 2 spliceosome ; GO:0071013 | inferred from high throughput direct assay	-
HMC04597	57214	FBgn0029801	CG15771	-	-	-	-	hydrolase activity ; GO:0016787 | inferred from electronic annotation with InterPro:IPR006439, InterPro:IPR011950
HMC03505	53289	FBgn0038814	CG15923	-	Insufficient genetic data for FlyBase to solicit a summary. [Date last reviewed: 2016-06-30]	negative regulation of centrosome duplication ; GO:0010826 | inferred from electronic annotation with InterPro:IPR019170 cilium assembly ; GO:0060271 | inferred from electronic annotation with InterPro:IPR019170	MKS complex ; GO:0036038 | inferred from electronic annotation with InterPro:IPR019170	-
HMJ22941	61220	FBgn0033185	CG1603	-	Insufficient genetic data for FlyBase to solicit a summary. [Date last reviewed: 2016-06-30]	positive regulation of transcription by RNA polymerase II ; GO:0045944 | inferred from sequence or structural similarity with UniProtKB:Q99592 regulation of gene expression ; GO:0010468 | inferred from biological aspect of ancestor with PANTHER:PTN001228570 positive regulation of transcription by RNA polymerase II ; GO:0045944 | inferred from mutant phenotype	nucleus ; GO:0005634 | inferred from sequence or structural similarity with UniProtKB:Q99592 histone methyltransferase complex ; GO:0035097 | colocalizes_with inferred from biological aspect of ancestor with PANTHER:PTN001228570 nucleus ; GO:0005634 | colocalizes_with inferred from biological aspect of ancestor with PANTHER:PTN001228570	transcription coactivator activity ; GO:0003713 | inferred from sequence or structural similarity with UniProtKB:Q99592 RNA polymerase II core promoter sequence-specific DNA binding ; GO:0000979 | inferred from biological aspect of ancestor with PANTHER:PTN001228570 sequence-specific DNA binding ; GO:0043565 | inferred from sequence or structural similarity with UniProtKB:Q99592
HMC04042	55355	FBgn0029941	CG1677	-	-	mRNA splicing, via spliceosome ; GO:0000398 | inferred by curator from GO:0071011,GO:0071013	catalytic step 2 spliceosome ; GO:0071013 | inferred from high throughput direct assay precatalytic spliceosome ; GO:0071011 | inferred from high throughput direct assay	metal ion binding ; GO:0046872 | inferred from electronic annotation with InterPro:IPR000571
HMJ23822	62399	FBgn0037741	CG16908	-	Insufficient genetic data for FlyBase to solicit a summary. [Date last reviewed: 2016-06-30]	-	-	-
HMC05207	62200	FBgn0030321	CG1703	-	-	-	-	ATPase activity ; GO:0016887 | inferred from electronic annotation with InterPro:IPR003439, InterPro:IPR017871 ATP binding ; GO:0005524 | inferred from electronic annotation with InterPro:IPR003439, InterPro:IPR017871
HMC03926	55703	FBgn0039943	CG17168	-	Insufficient genetic data for FlyBase to solicit a summary. [Date last reviewed: 2016-06-30]	production of miRNAs involved in gene silencing by miRNA ; GO:0035196 | inferred from biological aspect of ancestor with PANTHER:PTN001152383	nucleus ; GO:0005634 | inferred from biological aspect of ancestor with PANTHER:PTN000592573	mRNA binding ; GO:0003729 | inferred from biological aspect of ancestor with PANTHER:PTN002359305 RNA binding ; GO:0003723 | inferred from sequence or structural similarity with HGNC:30587
HMC03923	55702	FBgn0037882	CG17187	-	-	mRNA splicing, via spliceosome ; GO:0000398 | inferred by curator from GO:0071011	precatalytic spliceosome ; GO:0071011 | inferred from high throughput direct assay	nucleic acid binding ; GO:0003676 | inferred from electronic annotation with InterPro:IPR000504
HMJ23593	61967	FBgn0031164	CG1724	-	Insufficient genetic data for FlyBase to solicit a summary. [Date last reviewed: 2016-06-30]	protein import into mitochondrial matrix ; GO:0030150 | inferred from biological aspect of ancestor with PANTHER:PTN000050380 protein targeting to mitochondrion ; GO:0006626 | inferred from sequence or structural similarity with UniProtKB:O60830	TIM23 mitochondrial import inner membrane translocase complex ; GO:0005744 | inferred from sequence or structural similarity with UniProtKB:O60830 TIM23 mitochondrial import inner membrane translocase complex ; GO:0005744 | inferred from biological aspect of ancestor with PANTHER:PTN000050380 integral component of mitochondrial inner membrane ; GO:0031305 | inferred from biological aspect of ance…	protein transmembrane transporter activity ; GO:0008320 | contributes_to inferred from biological aspect of ancestor with PANTHER:PTN000050380 P-P-bond-hydrolysis-driven protein transmembrane transporter activity ; GO:0015450 | inferred from sequence or structural similarity with UniProtKB:O60830
HMJ23968	62484	FBgn0032751	CG17343	-	Insufficient genetic data for FlyBase to solicit a summary. [Date last reviewed: 2016-06-30]	-	-	-
HMJ23687	62330	FBgn0039977	CG17454	-	Insufficient genetic data for FlyBase to solicit a summary. [Date last reviewed: 2016-06-30]	mRNA processing ; GO:0006397 | inferred from electronic annotation with InterPro:IPR010304 mRNA splicing, via spliceosome ; GO:0000398 | inferred by curator from GO:0071011 regulation of alternative mRNA splicing, via spliceosome ; GO:0000381 | inferred from high throughput mutant phenotype	cytoplasm ; GO:0005737 | inferred from electronic annotation with InterPro:IPR010304 nucleus ; GO:0005634 | inferred from electronic annotation with InterPro:IPR010304 precatalytic spliceosome ; GO:0071011 | inferred from high throughput direct assay nucleus ; GO:0005634 | inferred by curator from GO:0000381	RNA binding ; GO:0003723 | inferred from sequence or structural similarity with HGNC:16900
HMJ22824	60458	FBgn0031544	CG17593	-	-	-	cytoplasm ; GO:0005737 | inferred from direct assay endomembrane system ; GO:0012505 | inferred from high throughput direct assay endoplasmic reticulum ; GO:0005783 | inferred from biological aspect of ancestor with PANTHER:PTN000306328	calcium ion binding ; GO:0005509 | inferred from biological aspect of ancestor with PANTHER:PTN000306328
HMC04793	57480	FBgn0038549	CG17802	-	Insufficient genetic data for FlyBase to solicit a summary. [Date last reviewed: 2016-06-30]	regulation of transcription, DNA-templated ; GO:0006355 | inferred from sequence or structural similarity with UniProtKB:P41696 regulation of transcription, DNA-templated ; GO:0006355 | inferred from biological aspect of ancestor with PANTHER:PTN001227002	nucleus ; GO:0005634 | inferred from biological aspect of ancestor with PANTHER:PTN001227002 nucleus ; GO:0005634 | inferred from sequence or structural similarity with UniProtKB:P41696	zinc ion binding ; GO:0008270 | inferred from electronic annotation with InterPro:IPR012934 DNA-binding transcription factor activity ; GO:0003700 | inferred from biological aspect of ancestor with PANTHER:PTN001227002 DNA-binding transcription factor activity ; GO:0003700 | inferred from sequence or structural similarity with UniProtKB:P41696 DNA binding ; GO:0003677 | inferred from biological a…
HMJ23760	62365	FBgn0039498	CG17991	-	Insufficient genetic data for FlyBase to solicit a summary. [Date last reviewed: 2016-06-30]	protein polyubiquitination ; GO:0000209 | inferred from sequence or structural similarity with HGNC:26025	endoplasmic reticulum membrane ; GO:0005789 | inferred from sequence or structural similarity with HGNC:26025 mitochondrial outer membrane ; GO:0005741 | inferred from sequence or structural similarity with HGNC:26025	zinc ion binding ; GO:0008270 | inferred from electronic annotation with InterPro:IPR011016 ubiquitin-protein transferase activity ; GO:0004842 | inferred from sequence or structural similarity with HGNC:26025 zinc ion binding ; GO:0008270 | inferred from sequence model
HMJ03118	50900	FBgn0033491	CG18011	-	-	regulation of transcription by RNA polymerase II ; GO:0006357 | inferred from sequence or structural similarity with UniProtKB:P32338	nucleus ; GO:0005634 | inferred from sequence or structural similarity with UniProtKB:P32338	DNA-binding transcription factor activity, RNA polymerase II-specific ; GO:0000981 | inferred from sequence or structural similarity with UniProtKB:P32338 RNA polymerase II proximal promoter sequence-specific DNA binding ; GO:0000978 | inferred from sequence or structural similarity with UniProtKB:P32338
HMC04071	55383	FBgn0034512	CG18067	-	Insufficient genetic data for FlyBase to solicit a summary. [Date last reviewed: 2016-06-30]	multicellular organism reproduction ; GO:0032504 | inferred from high throughput expression pattern	extracellular space ; GO:0005615 | inferred from high throughput direct assay	-
HMS02858	44562	FBgn0034330	CG18107	-	Insufficient genetic data for FlyBase to solicit a summary. [Date last reviewed: 2016-06-30]	-	-	-
HMS02650	42957	FBgn0033226	CG1882	-	-	lipid homeostasis ; GO:0055088 | inferred from biological aspect of ancestor with PANTHER:PTN000105999	lipid droplet ; GO:0005811 | inferred from biological aspect of ancestor with PANTHER:PTN000106002 peroxisome ; GO:0005777 | inferred from sequence or structural similarity with HGNC:3402	carboxylic ester hydrolase activity ; GO:0052689 | inferred from biological aspect of ancestor with PANTHER:PTN000105999 epoxide hydrolase activity ; GO:0004301 | inferred from sequence or structural similarity with HGNC:3402 carboxylic ester hydrolase activity ; GO:0052689 | inferred from direct assay
HMJ21430	54007	FBgn0035271	CG2021	-	Insufficient genetic data for FlyBase to solicit a summary. [Date last reviewed: 2016-06-30]	mRNA splicing, via spliceosome ; GO:0000398 | inferred from sequence or structural similarity with SGD:S000003783 inferred from sequence or structural similarity with protein_id:AAD56232 RNA metabolic process ; GO:0016070 | inferred from biological aspect of ancestor with PANTHER:PTN000400405 mRNA splicing, via spliceosome ; GO:0000398 | inferred by curator from GO:0071011	U6 snRNP ; GO:0005688 | non-traceable author statement U6 snRNP ; GO:0005688 | inferred from biological aspect of ancestor with PANTHER:PTN000400465 precatalytic spliceosome ; GO:0071011 | inferred from high throughput direct assay spliceosomal complex ; GO:0005681 | inferred from sequence or structural similarity with protein_id:AAD56232 U4/U6 x U5 tri-snRNP complex ; GO:0046540 | inferred from …	RNA binding ; GO:0003723 | inferred from biological aspect of ancestor with PANTHER:PTN000400405 RNA binding ; GO:0003723 | inferred from sequence or structural similarity with HGNC:20471
HMC03853	55173	FBgn0033400	CG2063	-	Insufficient genetic data for FlyBase to solicit a summary. [Date last reviewed: 2016-06-30]	regulation of transcription, DNA-templated ; GO:0006355 | inferred from electronic annotation with InterPro:IPR012479	nucleus ; GO:0005634 | inferred from biological aspect of ancestor with PANTHER:PTN000336117	-
HMC04730	57423	FBgn0030008	CG2129	-	Insufficient genetic data for FlyBase to solicit a summary. [Date last reviewed: 2016-06-30]	regulation of transcription by RNA polymerase II ; GO:0006357 | inferred from sequence or structural similarity with UniProtKB:P41696	nucleus ; GO:0005634 | inferred from sequence or structural similarity with UniProtKB:P41696 heterochromatin ; GO:0000792 | inferred from direct assay	DNA-binding transcription activator activity, RNA polymerase II-specific ; GO:0001228 | inferred from sequence or structural similarity with UniProtKB:P41696 RNA polymerase II proximal promoter sequence-specific DNA binding ; GO:0000978 | inferred from sequence or structural similarity with UniProtKB:P41696
HMJ23615	61989	FBgn0030025	CG2147	-	Insufficient genetic data for FlyBase to solicit a summary. [Date last reviewed: 2016-06-30]	-	-	-
HMJ23507	61924	FBgn0039767	CG2218	-	Insufficient genetic data for FlyBase to solicit a summary. [Date last reviewed: 2016-06-30]	protein ubiquitination ; GO:0016567 | inferred from sequence or structural similarity with MGI:MGI:2154658 protein polyubiquitination ; GO:0000209 | inferred from biological aspect of ancestor with PANTHER:PTN001004132	nucleus ; GO:0005634 | inferred from sequence or structural similarity with MGI:MGI:2154658 nucleus ; GO:0005634 | inferred from biological aspect of ancestor with PANTHER:PTN001004132	ubiquitin-protein transferase activity ; GO:0004842 | inferred from sequence or structural similarity with MGI:MGI:2154658 ubiquitin protein ligase binding ; GO:0031625 | inferred from biological aspect of ancestor with PANTHER:PTN001004132 ubiquitin protein ligase activity ; GO:0061630 | inferred from biological aspect of ancestor with PANTHER:PTN001004132 ubiquitin-ubiquitin ligase activity ; G…
HMC04596	57213	FBgn0024995	CG2680	-	Insufficient genetic data for FlyBase to solicit a summary. [Date last reviewed: 2016-06-30]	protein dephosphorylation ; GO:0006470 | inferred from sequence or structural similarity with HGNC:30259 dephosphorylation ; GO:0016311 | inferred from biological aspect of ancestor with PANTHER:PTN000445775	cytoplasm ; GO:0005737 | inferred from biological aspect of ancestor with PANTHER:PTN000445812 cytosol ; GO:0005829 | inferred from sequence or structural similarity with HGNC:30259	phosphatase activity ; GO:0016791 | inferred from biological aspect of ancestor with PANTHER:PTN002711682 phosphoprotein phosphatase activity ; GO:0004721 | inferred from sequence or structural similarity with HGNC:30259 phosphatase activity ; GO:0016791 | inferred from direct assay
HMC03301	51750	FBgn0024998	CG2685	-	-	mRNA cis splicing, via spliceosome ; GO:0045292 | inferred from biological aspect of ancestor with PANTHER:PTN000331938 mRNA splicing, via spliceosome ; GO:0000398 | inferred by curator from GO:0071011,GO:0071013	catalytic step 2 spliceosome ; GO:0071013 | inferred from high throughput direct assay precatalytic spliceosome ; GO:0071011 | inferred from high throughput direct assay	RNA binding ; GO:0003723 | inferred from sequence or structural similarity with HGNC:16461
HMJ21649	52965	FBgn0034689	CG2921	-	-	protein methylation ; GO:0006479 | inferred from sequence or structural similarity with HGNC:17872 regulation of response to DNA damage stimulus ; GO:2001020 | inferred from sequence or structural similarity with HGNC:17872	cellular_component ; GO:0005575 | no biological data available	enzyme binding ; GO:0019899 | inferred from sequence or structural similarity with HGNC:17872 S-adenosylmethionine-dependent methyltransferase activity ; GO:0008757 | inferred from biological aspect of ancestor with PANTHER:PTN000262496 protein carboxyl O-methyltransferase activity ; GO:0051998 | inferred from biological aspect of ancestor with PANTHER:PTN000262496
HMC04114	56893	FBgn0037342	CG2931	-	Insufficient genetic data for FlyBase to solicit a summary. [Date last reviewed: 2016-06-30]	mRNA splicing, via spliceosome ; GO:0000398 | inferred by curator from GO:0071011,GO:0071013	catalytic step 2 spliceosome ; GO:0071013 | inferred from high throughput direct assay ribonucleoprotein complex ; GO:1990904 | inferred from biological aspect of ancestor with PANTHER:PTN002768817 precatalytic spliceosome ; GO:0071011 | inferred from high throughput direct assay	mRNA binding ; GO:0003729 | inferred from sequence or structural similarity RNA binding ; GO:0003723 | inferred from biological aspect of ancestor with PANTHER:PTN002768817
HMJ21828	57820	FBgn0050069	CG30069	-	CG30069 is a large protein conserved in other insects with up to 80 copies of a tandem array of a 29 amino acid repeat. Ubiquitous RNAi causes lethality and wing-specific RNAi causes wing adhesion defects. [Date last reviewed: 2016-08-25]	wing disc development ; GO:0035220 | inferred from direct assay	cellular_component ; GO:0005575 | no biological data available	molecular_function ; GO:0003674 | no biological data available
HMJ22935	61214	FBgn0050197	CG30197	-	-	biological_process ; GO:0008150 | no biological data available	extracellular region ; GO:0005576 | inferred from electronic annotation with InterPro:IPR008197	peptidase inhibitor activity ; GO:0030414 | inferred from electronic annotation with InterPro:IPR008197
HMJ21503	54809	FBgn0050338	CG30338	-	Insufficient genetic data for FlyBase to solicit a summary. [Date last reviewed: 2016-06-30]	biological_process ; GO:0008150 | no biological data available	cellular_component ; GO:0005575 | no biological data available	molecular_function ; GO:0003674 | no biological data available
HMC05056	60063	FBgn0050357	CG30357	-	Insufficient genetic data for FlyBase to solicit a summary. [Date last reviewed: 2016-10-13]	biological_process ; GO:0008150 | no biological data available	cellular_component ; GO:0005575 | no biological data available	molecular_function ; GO:0003674 | no biological data available
HMJ21647	52964	FBgn0050457	CG30457	-	Insufficient genetic data for FlyBase to solicit a summary. [Date last reviewed: 2016-06-30]	-	-	-
HMS02604	42911	FBgn0051016	CG31016	-	Insufficient genetic data for FlyBase to solicit a summary. [Date last reviewed: 2016-06-30]	oxidation-reduction process ; GO:0055114 | inferred from electronic annotation with InterPro:IPR005123, InterPro:IPR006620, InterPro:IPR013547 multicellular organism reproduction ; GO:0032504 | inferred from expression pattern peptidyl-proline hydroxylation to 4-hydroxy-L-proline ; GO:0018401 | inferred from biological aspect of ancestor with PANTHER:PTN001653950	endoplasmic reticulum ; GO:0005783 | inferred from biological aspect of ancestor with PANTHER:PTN001653950	L-ascorbic acid binding ; GO:0031418 | inferred from electronic annotation with InterPro:IPR006620 oxidoreductase activity, acting on single donors with incorporation of molecular oxygen, incorporation of two atoms of oxygen ; GO:0016702 | inferred from electronic annotation with InterPro:IPR013547 iron ion binding ; GO:0005506 | inferred from electronic annotation with InterPro:IPR006620 procoll…
HMJ21355	53970	FBgn0051262	CG31262	-	Insufficient genetic data for FlyBase to solicit a summary. [Date last reviewed: 2016-06-30]	transmembrane transport ; GO:0055085 | inferred from electronic annotation with InterPro:IPR001734	membrane ; GO:0016020 | inferred from electronic annotation with InterPro:IPR001734, InterPro:IPR019900	transmembrane transporter activity ; GO:0022857 | inferred from electronic annotation with InterPro:IPR001734
HMC04289	55993	FBgn0051296	CG31296	-	-	multicellular organism reproduction ; GO:0032504 | inferred from biological aspect of ancestor with PANTHER:PTN002232911	extracellular space ; GO:0005615 | inferred from biological aspect of ancestor with PANTHER:PTN000036124 extracellular region ; GO:0005576 | inferred from sequence model	molecular_function ; GO:0003674 | no biological data available
HMC03777	55630	FBgn0051326	CG31326	-	-	proteolysis ; GO:0006508 | inferred from electronic annotation with InterPro:IPR001254, InterPro:IPR001314, InterPro:IPR018114	-	serine-type endopeptidase activity ; GO:0004252 | NOT inferred from key residues
HMJ23467	61911	FBgn0051345	CG31345	-	Insufficient genetic data for FlyBase to solicit a summary. [Date last reviewed: 2016-06-30]	-	-	calcium ion binding ; GO:0005509 | inferred from electronic annotation with InterPro:IPR002048
HMC03852	55172	FBgn0051368	CG31368	-	Insufficient genetic data for FlyBase to solicit a summary. [Date last reviewed: 2016-06-30]	mRNA splicing, via spliceosome ; GO:0000398 | inferred from electronic annotation with InterPro:IPR026300 mRNA splicing, via spliceosome ; GO:0000398 | inferred by curator from GO:0071011,GO:0071013	spliceosomal complex ; GO:0005681 | inferred from biological aspect of ancestor with PANTHER:PTN000094619 catalytic step 2 spliceosome ; GO:0071013 | inferred from biological aspect of ancestor with PANTHER:PTN000094619 catalytic step 2 spliceosome ; GO:0071013 | inferred from high throughput direct assay Prp19 complex ; GO:0000974 | inferred from direct assay nucleus ; GO:0005634 | inferred from…	RNA binding ; GO:0003723 | inferred from sequence or structural similarity with HGNC:29513 RNA binding ; GO:0003723 | inferred from biological aspect of ancestor with PANTHER:PTN000094509 mRNA binding ; GO:0003729 | inferred from biological aspect of ancestor with PANTHER:PTN000094619
HMJ22058	58121	FBgn0043799	CG31381	-	-	tRNA modification ; GO:0006400 | inferred from biological aspect of ancestor with PANTHER:PTN000119608	mitochondrion ; GO:0005739 | inferred from biological aspect of ancestor with PANTHER:PTN000119617	nucleic acid binding ; GO:0003676 | inferred from electronic annotation with InterPro:IPR013087 tRNA dimethylallyltransferase activity ; GO:0052381 | inferred from biological aspect of ancestor with PANTHER:PTN000119608
HMJ22058	58121	FBgn0043799	CG31381	-	-	tRNA modification ; GO:0006400 | inferred from biological aspect of ancestor with PANTHER:PTN000119608	mitochondrion ; GO:0005739 | inferred from biological aspect of ancestor with PANTHER:PTN000119617	nucleic acid binding ; GO:0003676 | inferred from electronic annotation with InterPro:IPR013087 tRNA dimethylallyltransferase activity ; GO:0052381 | inferred from biological aspect of ancestor with PANTHER:PTN000119608
HMJ23049	61270	FBgn0051549	CG31549	-	Insufficient genetic data for FlyBase to solicit a summary. [Date last reviewed: 2016-06-30]	-	-	testosterone 17-beta-dehydrogenase (NADP+) activity ; GO:0047045 | inferred from sequence or structural similarity with UniProtKB:Q9BPX1 estradiol 17-beta-dehydrogenase activity ; GO:0004303 | inferred from sequence or structural similarity with UniProtKB:Q9BPX1
HMJ30043	62966	FBgn0260479	CG31904	-	Insufficient genetic data for FlyBase to solicit a summary. [Date last reviewed: 2016-06-30]	neurotransmitter transport ; GO:0006836 | inferred from sequence or structural similarity with DAT	integral component of membrane ; GO:0016021 | inferred from electronic annotation with InterPro:IPR000175 plasma membrane ; GO:0005886 | inferred from biological aspect of ancestor with PANTHER:PTN000177662 neuron projection ; GO:0043005 | inferred from biological aspect of ancestor with PANTHER:PTN000177868	neurotransmitter transporter activity ; GO:0005326 | inferred from sequence or structural similarity with DAT gamma-aminobutyric acid:sodium symporter activity ; GO:0005332 | inferred from biological aspect of ancestor with PANTHER:PTN000177868 neurotransmitter binding ; GO:0042165 | inferred from biological aspect of ancestor with PANTHER:PTN000177868
HMJ30043	62966	FBgn0260479	CG31904	-	Insufficient genetic data for FlyBase to solicit a summary. [Date last reviewed: 2016-06-30]	neurotransmitter transport ; GO:0006836 | inferred from sequence or structural similarity with DAT	integral component of membrane ; GO:0016021 | inferred from electronic annotation with InterPro:IPR000175 plasma membrane ; GO:0005886 | inferred from biological aspect of ancestor with PANTHER:PTN000177662 neuron projection ; GO:0043005 | inferred from biological aspect of ancestor with PANTHER:PTN000177868	neurotransmitter transporter activity ; GO:0005326 | inferred from sequence or structural similarity with DAT gamma-aminobutyric acid:sodium symporter activity ; GO:0005332 | inferred from biological aspect of ancestor with PANTHER:PTN000177868 neurotransmitter binding ; GO:0042165 | inferred from biological aspect of ancestor with PANTHER:PTN000177868
HMC04977	57783	FBgn0052091	CG32091	-	-	transmembrane transport ; GO:0055085 | inferred from biological aspect of ancestor with PANTHER:PTN000443108	plasma membrane ; GO:0005886 | inferred from biological aspect of ancestor with PANTHER:PTN000443108	ATP binding ; GO:0005524 | inferred from electronic annotation with InterPro:IPR003439, InterPro:IPR017871 ATPase activity, coupled to transmembrane movement of substances ; GO:0042626 | inferred from biological aspect of ancestor with PANTHER:PTN000443108
HMJ22480	58349	FBgn0047338	CG32148	-	-	-	cellular_component ; GO:0005575 | no biological data available	molecular_function ; GO:0003674 | no biological data available
HMC05252	62245	FBgn0052301	CG32301	-	Insufficient genetic data for FlyBase to solicit a summary. [Date last reviewed: 2016-06-30]	cyclic nucleotide biosynthetic process ; GO:0009190 | inferred from electronic annotation with InterPro:IPR001054, InterPro:IPR018297 notum development ; GO:0007477 | inferred from mutant phenotype adenylate cyclase-activating G protein-coupled receptor signaling pathway ; GO:0007189 | inferred from biological aspect of ancestor with PANTHER:PTN002899368 chaeta development ; GO:0022416 | inferred…	integral component of plasma membrane ; GO:0005887 | inferred from biological aspect of ancestor with PANTHER:PTN002899368	adenylate cyclase activity ; GO:0004016 | non-traceable author statement adenylate cyclase activity ; GO:0004016 | inferred from biological aspect of ancestor with PANTHER:PTN002899368
HMC05217	62210	FBgn0052445	CG32445	-	Insufficient genetic data for FlyBase to solicit a summary. [Date last reviewed: 2016-06-30]	galactose catabolic process via UDP-galactose ; GO:0033499 | inferred from biological aspect of ancestor with PANTHER:PTN000009552 glucose metabolic process ; GO:0006006 | inferred from biological aspect of ancestor with PANTHER:PTN000009552	-	carbohydrate binding ; GO:0030246 | inferred from electronic annotation with InterPro:IPR011013, InterPro:IPR014718 aldose 1-epimerase activity ; GO:0004034 | inferred from biological aspect of ancestor with PANTHER:PTN000009552
HMJ30008	62931	FBgn0260482	CG32599	-	Insufficient genetic data for FlyBase to solicit a summary. [Date last reviewed: 2016-10-13]	biological_process ; GO:0008150 | no biological data available	cellular_component ; GO:0005575 | no biological data available	molecular_function ; GO:0003674 | no biological data available
HMJ21836	57828	FBgn0052944	CG32944	-	-	intracellular signal transduction ; GO:0035556 | inferred from biological aspect of ancestor with PANTHER:PTN000683254 peptidyl-serine phosphorylation ; GO:0018105 | inferred from biological aspect of ancestor with PANTHER:PTN000683254	-	ATP binding ; GO:0005524 | inferred from electronic annotation with InterPro:IPR000719, InterPro:IPR002290, InterPro:IPR017441 protein serine/threonine kinase activity ; GO:0004674 | inferred from biological aspect of ancestor with PANTHER:PTN000683254
HMJ23451	61896	FBgn0034573	CG3295	-	Insufficient genetic data for FlyBase to solicit a summary. [Date last reviewed: 2016-06-30]	ubiquitin-dependent protein catabolic process ; GO:0006511 | inferred from biological aspect of ancestor with PANTHER:PTN000255799 proteasome-mediated ubiquitin-dependent protein catabolic process ; GO:0043161 | inferred from biological aspect of ancestor with PANTHER:PTN000255799	GID complex ; GO:0034657 | inferred from biological aspect of ancestor with PANTHER:PTN000255799 cytoplasm ; GO:0005737 | inferred from biological aspect of ancestor with PANTHER:PTN000255799 nucleus ; GO:0005634 | inferred from biological aspect of ancestor with PANTHER:PTN000255799	ubiquitin-protein transferase activity ; GO:0004842 | contributes_to inferred from biological aspect of ancestor with PANTHER:PTN000255799
HMS02699	43315	FBgn0053217	CG33217	-	Insufficient genetic data for FlyBase to solicit a summary. [Date last reviewed: 2016-10-13]	rRNA processing ; GO:0006364 | inferred from electronic annotation with InterPro:IPR039623 biological_process ; GO:0008150 | no biological data available	cellular_component ; GO:0005575 | no biological data available	molecular_function ; GO:0003674 | no biological data available
HMJ22343	58267	FBgn0053217	CG33217	-	Insufficient genetic data for FlyBase to solicit a summary. [Date last reviewed: 2016-10-13]	rRNA processing ; GO:0006364 | inferred from electronic annotation with InterPro:IPR039623 biological_process ; GO:0008150 | no biological data available	cellular_component ; GO:0005575 | no biological data available	molecular_function ; GO:0003674 | no biological data available
HMJ23455	61900	FBgn0053467	CG33467	-	Insufficient genetic data for FlyBase to solicit a summary. [Date last reviewed: 2016-06-30]	-	-	-
HMS02476	42640	FBgn0052831	CG33695	-	Insufficient genetic data for FlyBase to solicit a summary. [Date last reviewed: 2016-06-30]	-	MLL1 complex ; GO:0071339 | inferred from biological aspect of ancestor with PANTHER:PTN001086092 NURF complex ; GO:0016589 | inferred from biological aspect of ancestor with PANTHER:PTN001086092	DNA binding ; GO:0003677 | inferred from electronic annotation with InterPro:IPR009057
HMS02476	42640	FBgn0052831	CG33695	-	Insufficient genetic data for FlyBase to solicit a summary. [Date last reviewed: 2016-06-30]	-	MLL1 complex ; GO:0071339 | inferred from biological aspect of ancestor with PANTHER:PTN001086092 NURF complex ; GO:0016589 | inferred from biological aspect of ancestor with PANTHER:PTN001086092	DNA binding ; GO:0003677 | inferred from electronic annotation with InterPro:IPR009057
HMC04245	55956	FBgn0054034	CG34034	-	Insufficient genetic data for FlyBase to solicit a summary. [Date last reviewed: 2016-06-30]	multicellular organism reproduction ; GO:0032504 | inferred from high throughput expression pattern	extracellular space ; GO:0005615 | inferred from high throughput direct assay	molecular_function ; GO:0003674 | no biological data available
HMJ23827	62404	FBgn0085204	CG34175	-	Insufficient genetic data for FlyBase to solicit a summary. [Date last reviewed: 2016-06-30]	-	-	-
HMJ22361	58278	FBgn0085446	CG34417	-	-	actin cytoskeleton organization ; GO:0030036 | inferred from biological aspect of ancestor with PANTHER:PTN001141409 mesoderm development ; GO:0007498 | non-traceable author statement	microtubule organizing center ; GO:0005815 | inferred from biological aspect of ancestor with PANTHER:PTN001141409 filamentous actin ; GO:0031941 | inferred from biological aspect of ancestor with PANTHER:PTN001141409	actin binding ; GO:0003779 | inferred from sequence or structural similarity
HMJ21344	53962	FBgn0031245	CG3625	-	-	-	integral component of membrane ; GO:0016021 | inferred from electronic annotation with InterPro:IPR006838 endomembrane system ; GO:0012505 | inferred from biological aspect of ancestor with PANTHER:PTN001659973	-
HMJ22913	61192	FBgn0031662	CG3792	-	-	protein glycosylation ; GO:0006486 | inferred from sequence or structural similarity with UniProtKB:O75352	integral component of membrane ; GO:0016021 | inferred from sequence model	-
HMS02641	42948	FBgn0034938	CG3803	-	-	oxidation-reduction process ; GO:0055114 | inferred from electronic annotation with InterPro:IPR003780 respiratory chain complex IV assembly ; GO:0008535 | inferred from biological aspect of ancestor with PANTHER:PTN000590786 heme a biosynthetic process ; GO:0006784 | inferred from biological aspect of ancestor with PANTHER:PTN000590786	integral component of membrane ; GO:0016021 | inferred from electronic annotation with InterPro:IPR003780 mitochondrial inner membrane ; GO:0005743 | inferred from biological aspect of ancestor with PANTHER:PTN000590786	oxidoreductase activity, acting on the CH-CH group of donors ; GO:0016627 | inferred from electronic annotation with InterPro:IPR003780 cytochrome-c oxidase activity ; GO:0004129 | contributes_to inferred from biological aspect of ancestor with PANTHER:PTN000590786 oxidoreductase activity, acting on NAD(P)H, heme protein as acceptor ; GO:0016653 | inferred from biological aspect of ancestor with …
HMS01473	35731	FBgn0034938	CG3803	-	-	oxidation-reduction process ; GO:0055114 | inferred from electronic annotation with InterPro:IPR003780 respiratory chain complex IV assembly ; GO:0008535 | inferred from biological aspect of ancestor with PANTHER:PTN000590786 heme a biosynthetic process ; GO:0006784 | inferred from biological aspect of ancestor with PANTHER:PTN000590786	integral component of membrane ; GO:0016021 | inferred from electronic annotation with InterPro:IPR003780 mitochondrial inner membrane ; GO:0005743 | inferred from biological aspect of ancestor with PANTHER:PTN000590786	oxidoreductase activity, acting on the CH-CH group of donors ; GO:0016627 | inferred from electronic annotation with InterPro:IPR003780 cytochrome-c oxidase activity ; GO:0004129 | contributes_to inferred from biological aspect of ancestor with PANTHER:PTN000590786 oxidoreductase activity, acting on NAD(P)H, heme protein as acceptor ; GO:0016653 | inferred from biological aspect of ancestor with …
HMS01949	39030	FBgn0029866	CG3842	-	-	-	-	NADP-retinol dehydrogenase activity ; GO:0052650 | inferred from sequence or structural similarity with UniProtKB:Q8TC12
HMC04874	57557	FBgn0029867	CG3847	-	Insufficient genetic data for FlyBase to solicit a summary. [Date last reviewed: 2016-06-30]	negative regulation of transcription by RNA polymerase II ; GO:0000122 | inferred from sequence or structural similarity with UniProtKB:Q9XYD3	nucleus ; GO:0005634 | inferred from sequence or structural similarity with UniProtKB:Q9XYD3 nucleus ; GO:0005634 | inferred from biological aspect of ancestor with PANTHER:PTN001227969	RNA polymerase II regulatory region sequence-specific DNA binding ; GO:0000977 | inferred from sequence or structural similarity with UniProtKB:Q9XYD3
HMS02705	43992	FBgn0038003	CG3916	-	Insufficient genetic data for FlyBase to solicit a summary. [Date last reviewed: 2016-06-30]	proteolysis ; GO:0006508 | inferred from sequence model proteolysis ; GO:0006508 | inferred from biological aspect of ancestor with PANTHER:PTN001207268	extracellular space ; GO:0005615 | inferred from biological aspect of ancestor with PANTHER:PTN001207268	serine-type endopeptidase activity ; GO:0004252 | inferred from biological aspect of ancestor with PANTHER:PTN001207268 serine-type endopeptidase activity ; GO:0004252 | inferred from sequence model
HMS02874	44578	FBgn0058178	CG40178	-	Insufficient genetic data for FlyBase to solicit a summary. [Date last reviewed: 2016-06-30]	cell redox homeostasis ; GO:0045454 | inferred from electronic annotation with InterPro:IPR013766	-	-
HMS00979	34013	FBgn0011824	CG4038	-	Insufficient genetic data for FlyBase to solicit a summary. [Date last reviewed: 2016-06-30]	rRNA pseudouridine synthesis ; GO:0031118 | inferred from sequence or structural similarity with UniProtKB:P32495 snoRNA guided rRNA pseudouridine synthesis ; GO:0000454 | inferred from biological aspect of ancestor with PANTHER:PTN000579935	box H/ACA snoRNP complex ; GO:0031429 | inferred from biological aspect of ancestor with PANTHER:PTN000579935 nucleolus ; GO:0005730 | inferred from high throughput direct assay small nucleolar ribonucleoprotein complex ; GO:0005732 | inferred from sequence or structural similarity with UniProtKB:P32495 nucleoplasm ; GO:0005654 | inferred from high throughput direct assay	box H/ACA snoRNA binding ; GO:0034513 | inferred from biological aspect of ancestor with PANTHER:PTN000579935
HMS00381	34951	FBgn0259203	CG42307	-	Insufficient genetic data for FlyBase to solicit a summary. [Date last reviewed: 2016-10-13]	biological_process ; GO:0008150 | no biological data available	cellular_component ; GO:0005575 | no biological data available	molecular_function ; GO:0003674 | no biological data available
HMS00381	34951	FBgn0259203	CG42307	-	Insufficient genetic data for FlyBase to solicit a summary. [Date last reviewed: 2016-10-13]	biological_process ; GO:0008150 | no biological data available	cellular_component ; GO:0005575 | no biological data available	molecular_function ; GO:0003674 | no biological data available
HMC03479	56861	FBgn0259932	CG42455	-	Insufficient genetic data for FlyBase to solicit a summary. [Date last reviewed: 2016-06-30]	-	-	-
HMC03479	56861	FBgn0259932	CG42455	-	Insufficient genetic data for FlyBase to solicit a summary. [Date last reviewed: 2016-06-30]	-	-	-
HMJ23268	61825	FBgn0031389	CG4259	-	Insufficient genetic data for FlyBase to solicit a summary. [Date last reviewed: 2016-06-30]	proteolysis ; GO:0006508 | inferred from electronic annotation with InterPro:IPR001254	-	serine-type endopeptidase activity ; GO:0004252 | NOT inferred from key residues
HMC03611	52873	FBgn0031409	CG4271	-	Insufficient genetic data for FlyBase to solicit a summary. [Date last reviewed: 2016-06-30]	proteolysis ; GO:0006508 | inferred from electronic annotation with InterPro:IPR001254, InterPro:IPR001314	-	serine-type endopeptidase activity ; GO:0004252 | NOT inferred from key residues
HMS02459	42624	FBgn0034742	CG4294	-	Insufficient genetic data for FlyBase to solicit a summary. [Date last reviewed: 2016-06-30]	-	-	-
HMJ23766	62371	FBgn0262562	CG43102	-	-	actin cytoskeleton organization ; GO:0030036 | inferred from biological aspect of ancestor with PANTHER:PTN000984074 positive regulation of Rho protein signal transduction ; GO:0035025 | inferred from sequence or structural similarity with RhoGEF4	cellular_component ; GO:0005575 | no biological data available	guanyl-nucleotide exchange factor activity ; GO:0005085 | inferred from biological aspect of ancestor with PANTHER:PTN000984074 Rho guanyl-nucleotide exchange factor activity ; GO:0005089 | inferred from sequence or structural similarity with RhoGEF4 Rho guanyl-nucleotide exchange factor activity ; GO:0005089 | inferred from biological aspect of ancestor with PANTHER:PTN000984074
HMC04770	57460	FBgn0262719	CG43163	-	-	regulation of mitotic cell cycle ; GO:0007346 | inferred from biological aspect of ancestor with PANTHER:PTN001297240	mitotic spindle ; GO:0072686 | inferred from biological aspect of ancestor with PANTHER:PTN001297240 midbody ; GO:0030496 | inferred from biological aspect of ancestor with PANTHER:PTN001297240	molecular_function ; GO:0003674 | no biological data available
HMS02323	41926	FBgn0263077	CG43340	-	Insufficient genetic data for FlyBase to solicit a summary. [Date last reviewed: 2016-06-30]	-	cellular_component ; GO:0005575 | no biological data available	molecular_function ; GO:0003674 | no biological data available
HMC04772	57462	FBgn0263750	CG43675	-	Insufficient genetic data for FlyBase to solicit a summary. [Date last reviewed: 2016-06-30]	-	-	-
HMJ22267	58246	FBgn0264503	CG43902	-	Insufficient genetic data for FlyBase to solicit a summary. [Date last reviewed: 2017-07-13]	chromatin remodeling ; GO:0006338 | inferred from biological aspect of ancestor with PANTHER:PTN001100765	nucleolus ; GO:0005730 | inferred from biological aspect of ancestor with PANTHER:PTN001100765 cytoplasm ; GO:0005737 | inferred from biological aspect of ancestor with PANTHER:PTN001100765 nucleoplasm ; GO:0005654 | inferred from biological aspect of ancestor with PANTHER:PTN001100765	histone binding ; GO:0042393 | inferred from biological aspect of ancestor with PANTHER:PTN001100765 chromatin binding ; GO:0003682 | inferred from biological aspect of ancestor with PANTHER:PTN001100765
HMC03176	53270	FBgn0034734	CG4554	-	Insufficient genetic data for FlyBase to solicit a summary. [Date last reviewed: 2016-06-30]	-	90S preribosome ; GO:0030686 | inferred from biological aspect of ancestor with PANTHER:PTN000427367 nucleolus ; GO:0005730 | inferred from biological aspect of ancestor with PANTHER:PTN000427367 small-subunit processome ; GO:0032040 | inferred from biological aspect of ancestor with PANTHER:PTN000427367	-
HMC05020	60027	FBgn0260456	CG4806	-	Insufficient genetic data for FlyBase to solicit a summary. [Date last reviewed: 2016-06-30]	-	ribonucleoprotein complex ; GO:1990904 | inferred from biological aspect of ancestor with PANTHER:PTN002768817	RNA binding ; GO:0003723 | inferred from biological aspect of ancestor with PANTHER:PTN002768817 mRNA binding ; GO:0003729 | inferred from sequence or structural similarity
HMJ23135	61303	FBgn0039013	CG4813	-	-	protein ubiquitination ; GO:0016567 | inferred from sequence or structural similarity with MGI:MGI:1913993	cytoplasm ; GO:0005737 | inferred from sequence or structural similarity with MGI:MGI:1913993	metal ion binding ; GO:0046872 | inferred from electronic annotation with InterPro:IPR040178 zinc ion binding ; GO:0008270 | inferred from sequence model ubiquitin-protein transferase activity ; GO:0004842 | inferred from sequence or structural similarity with MGI:MGI:1913993
HMC03917	55701	FBgn0039566	CG4849	-	Insufficient genetic data for FlyBase to solicit a summary. [Date last reviewed: 2016-06-30]	translational elongation ; GO:0006414 | inferred from sequence or structural similarity positive regulation of gene expression ; GO:0010628 | inferred from mutant phenotype mRNA splicing, via spliceosome ; GO:0000398 | inferred from biological aspect of ancestor with PANTHER:PTN000562846 mRNA splicing, via spliceosome ; GO:0000398 | inferred by curator from GO:0071011,GO:0071013	cytosol ; GO:0005829 | inferred from biological aspect of ancestor with PANTHER:PTN000562745 precatalytic spliceosome ; GO:0071011 | inferred from high throughput direct assay ribonucleoprotein complex ; GO:1990904 | inferred from biological aspect of ancestor with PANTHER:PTN000562745 U2-type catalytic step 2 spliceosome ; GO:0071007 | inferred from biological aspect of ancestor with PANTHER:PTN…	GTP binding ; GO:0005525 | inferred from electronic annotation with InterPro:IPR000795, InterPro:IPR004161, InterPro:IPR005225, InterPro:IPR005517 U5 snRNA binding ; GO:0030623 | inferred from biological aspect of ancestor with PANTHER:PTN000562846 translation elongation factor activity ; GO:0003746 | inferred from sequence or structural similarity GTPase activity ; GO:0003924 | inferred from bio…
HMC04417	56977	FBgn0032194	CG4901	-	CG4901 is an ATP-dependent RNA helicase involved in neurogenesis and spliceosomal complex disassembly. [Date last reviewed: 2016-06-23]	positive regulation of transcription by RNA polymerase I ; GO:0045943 | inferred from biological aspect of ancestor with PANTHER:PTN001053657	nucleolus ; GO:0005730 | inferred from biological aspect of ancestor with PANTHER:PTN001053657	ATP binding ; GO:0005524 | inferred from electronic annotation with InterPro:IPR002464, InterPro:IPR011545 helicase activity ; GO:0004386 | inferred from sequence or structural similarity RNA binding ; GO:0003723 | inferred from biological aspect of ancestor with PANTHER:PTN000433338 ATP-dependent 3'-5' RNA helicase activity ; GO:0034459 | inferred from biological aspect of ancestor with PANTHER:…
HMC03437	51863	FBgn0032195	CG4908	-	Insufficient genetic data for FlyBase to solicit a summary. [Date last reviewed: 2016-06-30]	mitochondrial respiratory chain complex III assembly ; GO:0034551 | inferred from electronic annotation with InterPro:IPR014851, InterPro:IPR027243	-	ATP binding ; GO:0005524 | inferred from electronic annotation with InterPro:IPR003959, InterPro:IPR003960
HMS02676	43303	FBgn0032372	CG4988	-	Insufficient genetic data for FlyBase to solicit a summary. [Date last reviewed: 2016-06-30]	galactose catabolic process via UDP-galactose ; GO:0033499 | inferred from biological aspect of ancestor with PANTHER:PTN000009552 glucose metabolic process ; GO:0006006 | inferred from biological aspect of ancestor with PANTHER:PTN000009552	-	carbohydrate binding ; GO:0030246 | inferred from electronic annotation with InterPro:IPR011013, InterPro:IPR014718 aldose 1-epimerase activity ; GO:0004034 | inferred from biological aspect of ancestor with PANTHER:PTN000009552
HMS02623	42930	FBgn0028744	CG5033	-	-	regulation of hemocyte proliferation ; GO:0035206 | inferred from mutant phenotype maturation of LSU-rRNA from tricistronic rRNA transcript (SSU-rRNA, 5.8S rRNA, LSU-rRNA) ; GO:0000463 | inferred from biological aspect of ancestor with PANTHER:PTN000426773	preribosome, large subunit precursor ; GO:0030687 | inferred from biological aspect of ancestor with PANTHER:PTN000426773 PeBoW complex ; GO:0070545 | inferred from biological aspect of ancestor with PANTHER:PTN000426773	ribonucleoprotein complex binding ; GO:0043021 | inferred from biological aspect of ancestor with PANTHER:PTN000426773
HMS01433	35020	FBgn0028744	CG5033	-	-	regulation of hemocyte proliferation ; GO:0035206 | inferred from mutant phenotype maturation of LSU-rRNA from tricistronic rRNA transcript (SSU-rRNA, 5.8S rRNA, LSU-rRNA) ; GO:0000463 | inferred from biological aspect of ancestor with PANTHER:PTN000426773	preribosome, large subunit precursor ; GO:0030687 | inferred from biological aspect of ancestor with PANTHER:PTN000426773 PeBoW complex ; GO:0070545 | inferred from biological aspect of ancestor with PANTHER:PTN000426773	ribonucleoprotein complex binding ; GO:0043021 | inferred from biological aspect of ancestor with PANTHER:PTN000426773
HMC03443	51869	FBgn0032477	CG5287	-	-	dolichyl diphosphate biosynthetic process ; GO:0006489 | inferred from biological aspect of ancestor with PANTHER:PTN000060284 protein N-linked glycosylation ; GO:0006487 | inferred from biological aspect of ancestor with PANTHER:PTN000060284	integral component of membrane ; GO:0016021 | inferred from biological aspect of ancestor with PANTHER:PTN000060284	phospho-N-acetylmuramoyl-pentapeptide-transferase activity ; GO:0008963 | inferred from electronic annotation with InterPro:IPR000715 UDP-N-acetylglucosamine-dolichyl-phosphate N-acetylglucosaminephosphotransferase activity ; GO:0003975 | inferred from biological aspect of ancestor with PANTHER:PTN000060284
HMC04050	56877	FBgn0038704	CG5316	-	-	single strand break repair ; GO:0000012 | inferred from biological aspect of ancestor with PANTHER:PTN000281062 single strand break repair ; GO:0000012 | inferred from sequence or structural similarity with UniProtKB:Q7Z2E3-1 mRNA splicing, via spliceosome ; GO:0000398 | inferred by curator from GO:0071011 double-strand break repair ; GO:0006302 | inferred from biological aspect of ancestor with …	nucleus ; GO:0005634 | inferred from biological aspect of ancestor with PANTHER:PTN000281062 precatalytic spliceosome ; GO:0071011 | inferred from high throughput direct assay	single-strand break-containing DNA binding ; GO:1990165 | inferred from biological aspect of ancestor with PANTHER:PTN000281062 double-stranded RNA binding ; GO:0003725 | inferred from biological aspect of ancestor with PANTHER:PTN000281062 single-stranded DNA binding ; GO:0003697 | inferred from biological aspect of ancestor with PANTHER:PTN000281062 damaged DNA binding ; GO:0003684 | inferred f…
HMS02797	44080	FBgn0039160	CG5510	-	-	endoplasmic reticulum organization ; GO:0007029 | inferred from biological aspect of ancestor with PANTHER:PTN000259611 endoplasmic reticulum to Golgi vesicle-mediated transport ; GO:0006888 | inferred from biological aspect of ancestor with PANTHER:PTN000259611 Golgi organization ; GO:0007030 | inferred from biological aspect of ancestor with PANTHER:PTN000259611	endoplasmic reticulum-Golgi intermediate compartment ; GO:0005793 | inferred from biological aspect of ancestor with PANTHER:PTN000259611 Golgi membrane ; GO:0000139 | inferred from biological aspect of ancestor with PANTHER:PTN000259611 endoplasmic reticulum membrane ; GO:0005789 | inferred from biological aspect of ancestor with PANTHER:PTN000259611 COPII-coated ER to Golgi transport vesicle ; …	mannose binding ; GO:0005537 | inferred from biological aspect of ancestor with PANTHER:PTN000259611
HMJ23690	62333	FBgn0034908	CG5543	-	-	regulation of histone H2B conserved C-terminal lysine ubiquitination ; GO:2001173 | inferred from biological aspect of ancestor with PANTHER:PTN000410770 regulation of DNA double-strand break processing ; GO:1903775 | inferred from biological aspect of ancestor with PANTHER:PTN000410770	nucleus ; GO:0005634 | inferred from biological aspect of ancestor with PANTHER:PTN000410770 site of double-strand break ; GO:0035861 | inferred from biological aspect of ancestor with PANTHER:PTN000410770	-
HMC04128	56906	FBgn0034160	CG5550	-	Insufficient genetic data for FlyBase to solicit a summary. [Date last reviewed: 2016-06-30]	-	-	-
HMS02426	42594	FBgn0031332	CG5556	-	Insufficient genetic data for FlyBase to solicit a summary. [Date last reviewed: 2016-06-30]	-	-	hydrolase activity ; GO:0016787 | inferred from electronic annotation with InterPro:IPR006439 magnesium ion binding ; GO:0000287 | inferred from biological aspect of ancestor with PANTHER:PTN000431249
HMJ23238	61346	FBgn0036254	CG5645	-	Insufficient genetic data for FlyBase to solicit a summary. [Date last reviewed: 2017-07-13]	endonucleolytic cleavage in ITS1 to separate SSU-rRNA from 5.8S rRNA and LSU-rRNA from tricistronic rRNA transcript (SSU-rRNA, 5.8S rRNA, LSU-rRNA) ; GO:0000447 | inferred from biological aspect of ancestor with PANTHER:PTN000375561	90S preribosome ; GO:0030686 | inferred from biological aspect of ancestor with PANTHER:PTN000375561 nucleolus ; GO:0005730 | inferred from biological aspect of ancestor with PANTHER:PTN000375561	-
HMC04202	55916	FBgn0039182	CG5728	-	Insufficient genetic data for FlyBase to solicit a summary. [Date last reviewed: 2016-06-30]	mRNA processing ; GO:0006397 | inferred from electronic annotation with InterPro:IPR008847 regulation of alternative mRNA splicing, via spliceosome ; GO:0000381 | inferred from high throughput mutant phenotype	small-subunit processome ; GO:0032040 | inferred from biological aspect of ancestor with PANTHER:PTN000588341 nucleus ; GO:0005634 | inferred by curator from GO:0000381 nucleolus ; GO:0005730 | inferred from biological aspect of ancestor with PANTHER:PTN000588341	nucleic acid binding ; GO:0003676 | inferred from electronic annotation with InterPro:IPR003029
HMS02953	50719	FBgn0034291	CG5770	-	Insufficient genetic data for FlyBase to solicit a summary. [Date last reviewed: 2016-06-30]	-	-	-
HMC03925	55208	FBgn0027617	CG5808	-	Insufficient genetic data for FlyBase to solicit a summary. [Date last reviewed: 2016-06-30]	protein peptidyl-prolyl isomerization ; GO:0000413 | inferred from electronic annotation with InterPro:IPR002130 mRNA splicing, via spliceosome ; GO:0000398 | inferred by curator from GO:0071011,GO:0071013 regulation of phosphorylation of RNA polymerase II C-terminal domain ; GO:1901407 | inferred from biological aspect of ancestor with PANTHER:PTN000116816	catalytic step 2 spliceosome ; GO:0071013 | inferred from high throughput direct assay precatalytic spliceosome ; GO:0071011 | inferred from high throughput direct assay nucleus ; GO:0005634 | inferred from biological aspect of ancestor with PANTHER:PTN000116816	nucleic acid binding ; GO:0003676 | inferred from electronic annotation with InterPro:IPR000504 peptidyl-prolyl cis-trans isomerase activity ; GO:0003755 | inferred from electronic annotation with InterPro:IPR002130, InterPro:IPR024936 mRNA binding ; GO:0003729 | inferred from sequence or structural similarity
HMC03904	55690	FBgn0030625	CG5877	-	-	RNA interference ; GO:0016246 | inferred from biological aspect of ancestor with PANTHER:PTN001003642 mRNA splicing, via spliceosome ; GO:0000398 | inferred by curator from GO:0071013 chromatin silencing by small RNA ; GO:0031048 | inferred from biological aspect of ancestor with PANTHER:PTN001003642	catalytic step 2 spliceosome ; GO:0071013 | inferred from high throughput direct assay	-
HMC04265	55970	FBgn0036225	CG5883	-	Insufficient genetic data for FlyBase to solicit a summary. [Date last reviewed: 2016-06-30]	chitin metabolic process ; GO:0006030 | inferred from electronic annotation with InterPro:IPR002557	extracellular region ; GO:0005576 | inferred from electronic annotation with InterPro:IPR002557	chitin binding ; GO:0008061 | inferred from electronic annotation with InterPro:IPR002557
HMC03969	55282	FBgn0063649	CG6006	-	-	transmembrane transport ; GO:0055085 | inferred from electronic annotation with InterPro:IPR005828, InterPro:IPR005829	integral component of membrane ; GO:0016021 | inferred from electronic annotation with InterPro:IPR005828, InterPro:IPR005829	transmembrane transporter activity ; GO:0022857 | inferred from electronic annotation with InterPro:IPR005828
HMJ21401	53997	FBgn0039488	CG6066	-	Insufficient genetic data for FlyBase to solicit a summary. [Date last reviewed: 2016-06-30]	mRNA splicing, via spliceosome ; GO:0000398 | inferred by curator from GO:0071013 Notch signaling pathway ; GO:0007219 | inferred from electronic annotation with InterPro:IPR040466 negative regulation of transcription, DNA-templated ; GO:0045892 | inferred from electronic annotation with InterPro:IPR040466	catalytic step 2 spliceosome ; GO:0071013 | inferred from high throughput direct assay	chromatin binding ; GO:0003682 | inferred from electronic annotation with InterPro:IPR009269
HMC04557	57175	FBgn0032261	CG6094	-	Insufficient genetic data for FlyBase to solicit a summary. [Date last reviewed: 2016-06-30]	mitochondrial translational termination ; GO:0070126 | inferred from sequence or structural similarity with UniProtKB:Q14197 mitochondrial translational termination ; GO:0070126 | inferred from biological aspect of ancestor with PANTHER:PTN000117598	mitochondrial large ribosomal subunit ; GO:0005762 | inferred from biological aspect of ancestor with PANTHER:PTN000117598 mitochondrion ; GO:0005739 | inferred from sequence or structural similarity with UniProtKB:Q14197	translation release factor activity, codon nonspecific ; GO:0016150 | inferred from sequence or structural similarity with UniProtKB:Q14197
HMC05316	62843	FBgn0038339	CG6118	-	Insufficient genetic data for FlyBase to solicit a summary. [Date last reviewed: 2016-06-30]	regulation of transcription by RNA polymerase II ; GO:0006357 | inferred from biological aspect of ancestor with PANTHER:PTN001135010	nucleus ; GO:0005634 | inferred from biological aspect of ancestor with PANTHER:PTN001135010	-
HMJ24050	62507	FBgn0030631	CG6227	-	-	mRNA splicing, via spliceosome ; GO:0000398 | inferred from sequence or structural similarity with SGD:S000000441 regulation of alternative mRNA splicing, via spliceosome ; GO:0000381 | inferred from high throughput mutant phenotype	spliceosomal complex ; GO:0005681 | inferred from sequence or structural similarity with SGD:S000000441 nucleus ; GO:0005634 | inferred by curator from GO:0000381	nucleic acid binding ; GO:0003676 | inferred from electronic annotation with InterPro:IPR011545 ATP binding ; GO:0005524 | inferred from electronic annotation with InterPro:IPR011545 ATP-dependent RNA helicase activity ; GO:0004004 | inferred from sequence or structural similarity with SGD:S000000441
HMC03786	55638	FBgn0030631	CG6227	-	-	mRNA splicing, via spliceosome ; GO:0000398 | inferred from sequence or structural similarity with SGD:S000000441 regulation of alternative mRNA splicing, via spliceosome ; GO:0000381 | inferred from high throughput mutant phenotype	spliceosomal complex ; GO:0005681 | inferred from sequence or structural similarity with SGD:S000000441 nucleus ; GO:0005634 | inferred by curator from GO:0000381	nucleic acid binding ; GO:0003676 | inferred from electronic annotation with InterPro:IPR011545 ATP binding ; GO:0005524 | inferred from electronic annotation with InterPro:IPR011545 ATP-dependent RNA helicase activity ; GO:0004004 | inferred from sequence or structural similarity with SGD:S000000441
HMS04506	57586	FBgn0035675	CG6610	-	Insufficient genetic data for FlyBase to solicit a summary. [Date last reviewed: 2016-06-30]	mRNA splicing, via spliceosome ; GO:0000398 | inferred from sequence or structural similarity with SGD:S000000948	Lsm1-7-Pat1 complex ; GO:1990726 | inferred from biological aspect of ancestor with PANTHER:PTN000469347 spliceosomal complex ; GO:0005681 | inferred from sequence or structural similarity with SGD:S000000948 U6 snRNP ; GO:0005688 | inferred from biological aspect of ancestor with PANTHER:PTN000469347 U4/U6 x U5 tri-snRNP complex ; GO:0046540 | inferred from biological aspect of ancestor with PAN…	RNA binding ; GO:0003723 | contributes_to inferred from biological aspect of ancestor with PANTHER:PTN000469347 RNA binding ; GO:0003723 | contributes_to inferred from sequence or structural similarity with SGD:S000000948
HMJ22521	60352	FBgn0036056	CG6709	-	Insufficient genetic data for FlyBase to solicit a summary. [Date last reviewed: 2017-07-13]	-	-	-
HMJ22521	60352	FBgn0036056	CG6709	-	Insufficient genetic data for FlyBase to solicit a summary. [Date last reviewed: 2017-07-13]	-	-	-
HMJ22412	58305	FBgn0032298	CG6724	-	-	maturation of LSU-rRNA from tricistronic rRNA transcript (SSU-rRNA, 5.8S rRNA, LSU-rRNA) ; GO:0000463 | inferred from sequence or structural similarity with UniProtKB:Q9GZL7	plasma membrane ; GO:0005886 | inferred from high throughput direct assay PeBoW complex ; GO:0070545 | inferred from sequence or structural similarity with UniProtKB:Q9GZL7 PeBoW complex ; GO:0070545 | inferred from biological aspect of ancestor with PANTHER:PTN000458000 cytosol ; GO:0005829 | inferred from high throughput direct assay preribosome, large subunit precursor ; GO:0030687 | inferred …	-
HMJ23044	61265	FBgn0037921	CG6808	-	Insufficient genetic data for FlyBase to solicit a summary. [Date last reviewed: 2016-06-30]	regulation of transcription, DNA-templated ; GO:0006355 | inferred from sequence or structural similarity with UniProtKB:P47043	nucleus ; GO:0005634 | inferred from sequence or structural similarity with UniProtKB:P47043	transcription regulatory region sequence-specific DNA binding ; GO:0000976 | inferred from sequence or structural similarity with UniProtKB:P47043 zinc ion binding ; GO:0008270 | inferred from sequence or structural similarity with UniProtKB:P47043
HMC04687	57383	FBgn0039233	CG7006	-	Insufficient genetic data for FlyBase to solicit a summary. [Date last reviewed: 2016-06-30]	ribosome assembly ; GO:0042255 | inferred from electronic annotation with InterPro:IPR016686 ribosomal large subunit biogenesis ; GO:0042273 | inferred from biological aspect of ancestor with PANTHER:PTN000602113	preribosome, large subunit precursor ; GO:0030687 | inferred from biological aspect of ancestor with PANTHER:PTN000602113 nucleolus ; GO:0005730 | inferred from biological aspect of ancestor with PANTHER:PTN000602113	RNA binding ; GO:0003723 | inferred from electronic annotation with InterPro:IPR002478
HMS02405	42004	FBgn0030892	CG7206	-	Insufficient genetic data for FlyBase to solicit a summary. [Date last reviewed: 2016-06-30]	transcription, DNA-templated ; GO:0006351 | inferred from biological aspect of ancestor with PANTHER:PTN002313313	nucleus ; GO:0005634 | inferred from biological aspect of ancestor with PANTHER:PTN002313313	molecular_function ; GO:0003674 | no biological data available
HMS02347	41950	FBgn0036501	CG7272	-	-	carbohydrate transmembrane transport ; GO:0034219 | inferred from sequence or structural similarity with WB:WBGene00019300	integral component of membrane ; GO:0016021 | inferred from electronic annotation with InterPro:IPR004316 Golgi apparatus ; GO:0005794 | inferred from sequence or structural similarity with WB:WBGene00019300 plasma membrane ; GO:0005886 | inferred from sequence or structural similarity with WB:WBGene00019300	sugar transmembrane transporter activity ; GO:0051119 | inferred from sequence or structural similarity with WB:WBGene00019300 sugar transmembrane transporter activity ; GO:0051119 | inferred from biological aspect of ancestor with PANTHER:PTN000846358
HMJ21272	53927	FBgn0032286	CG7300	-	Insufficient genetic data for FlyBase to solicit a summary. [Date last reviewed: 2016-06-30]	-	-	-
HMC04034	55347	FBgn0034432	CG7461	-	-	oxidation-reduction process ; GO:0055114 | inferred from electronic annotation with InterPro:IPR006089, InterPro:IPR006091, InterPro:IPR009075, InterPro:IPR009100, InterPro:IPR013786	mitochondrion ; GO:0005739 | inferred from biological aspect of ancestor with PANTHER:PTN001330929	flavin adenine dinucleotide binding ; GO:0050660 | inferred from electronic annotation with InterPro:IPR013786 very-long-chain-acyl-CoA dehydrogenase activity ; GO:0017099 | inferred from biological aspect of ancestor with PANTHER:PTN000856877 fatty-acyl-CoA binding ; GO:0000062 | inferred from biological aspect of ancestor with PANTHER:PTN000856877
HMC03939	55252	FBgn0036734	CG7564	-	Insufficient genetic data for FlyBase to solicit a summary. [Date last reviewed: 2016-06-30]	mRNA splicing, via spliceosome ; GO:0000398 | inferred by curator from GO:0071011 mRNA splice site selection ; GO:0006376 | inferred from biological aspect of ancestor with PANTHER:PTN000271979 mRNA splicing, via spliceosome ; GO:0000398 | inferred from sequence or structural similarity with SGD:S000002245 inferred from sequence or structural similarity with protein_id:BAA91737	U1 snRNP ; GO:0005685 | inferred from biological aspect of ancestor with PANTHER:PTN000271979 precatalytic spliceosome ; GO:0071011 | inferred from high throughput direct assay U1 snRNP ; GO:0005685 | inferred from sequence or structural similarity with SGD:S000002245 inferred from sequence or structural similarity with protein_id:BAA91737 U2-type prespliceosome ; GO:0071004 | inferred from biolo…	mRNA binding ; GO:0003729 | inferred from biological aspect of ancestor with PANTHER:PTN000271979
HMC03890	55194	FBgn0033548	CG7637	-	Insufficient genetic data for FlyBase to solicit a summary. [Date last reviewed: 2016-06-30]	rRNA pseudouridine synthesis ; GO:0031118 | inferred from biological aspect of ancestor with PANTHER:PTN000329686 snRNA pseudouridine synthesis ; GO:0031120 | inferred from biological aspect of ancestor with PANTHER:PTN000329686	box H/ACA telomerase RNP complex ; GO:0090661 | inferred from biological aspect of ancestor with PANTHER:PTN000329686 box H/ACA snoRNP complex ; GO:0031429 | inferred from biological aspect of ancestor with PANTHER:PTN000329686	telomerase RNA binding ; GO:0070034 | inferred from biological aspect of ancestor with PANTHER:PTN000329686 box H/ACA snoRNA binding ; GO:0034513 | inferred from biological aspect of ancestor with PANTHER:PTN000329686
HMJ22536	60871	FBgn0037549	CG7878	-	-	-	-	ATP binding ; GO:0005524 | inferred from electronic annotation with InterPro:IPR011545 RNA binding ; GO:0003723 | inferred from electronic annotation with InterPro:IPR004088 helicase activity ; GO:0004386 | inferred from sequence or structural similarity
HMJ22457	58327	FBgn0038597	CG8064	-	Insufficient genetic data for FlyBase to solicit a summary. [Date last reviewed: 2016-06-30]	-	small-subunit processome ; GO:0032040 | inferred from biological aspect of ancestor with PANTHER:PTN000457800 Pwp2p-containing subcomplex of 90S preribosome ; GO:0034388 | inferred from biological aspect of ancestor with PANTHER:PTN000457800	-
HMJ23663	62306	FBgn0036070	CG8072	-	Insufficient genetic data for FlyBase to solicit a summary. [Date last reviewed: 2016-06-30]	biological_process ; GO:0008150 | no biological data available	extracellular region ; GO:0005576 | inferred from sequence model	molecular_function ; GO:0003674 | no biological data available
HMC04363	56924	FBgn0033999	CG8093	-	Insufficient genetic data for FlyBase to solicit a summary. [Date last reviewed: 2016-06-30]	cellular lipid metabolic process ; GO:0044255 | inferred from biological aspect of ancestor with PANTHER:PTN002591693 multicellular organism reproduction ; GO:0032504 | inferred from high throughput expression pattern lipid metabolic process ; GO:0006629 | inferred from sequence or structural similarity	extracellular space ; GO:0005615 | inferred from sequence model	lipase activity ; GO:0016298 | inferred from sequence or structural similarity lipase activity ; GO:0016298 | inferred from biological aspect of ancestor with PANTHER:PTN002591693
HMJ02051	42489	FBgn0030871	CG8142	-	-	DNA-dependent DNA replication ; GO:0006261 | inferred from biological aspect of ancestor with PANTHER:PTN000186208	nucleus ; GO:0005634 | inferred from biological aspect of ancestor with PANTHER:PTN000186209 Elg1 RFC-like complex ; GO:0031391 | inferred from direct assay DNA replication factor C complex ; GO:0005663 | inferred from biological aspect of ancestor with PANTHER:PTN000186209	ATP binding ; GO:0005524 | inferred from electronic annotation with InterPro:IPR003959 DNA clamp loader activity ; GO:0003689 | contributes_to inferred from biological aspect of ancestor with PANTHER:PTN000186209
HMJ23009	61230	FBgn0035693	CG8219	-	-	NLS-bearing protein import into nucleus ; GO:0006607 | inferred from biological aspect of ancestor with PANTHER:PTN000055427 ribosomal protein import into nucleus ; GO:0006610 | inferred from biological aspect of ancestor with PANTHER:PTN000055427	nuclear periphery ; GO:0034399 | inferred from biological aspect of ancestor with PANTHER:PTN000055427 cytoplasm ; GO:0005737 | inferred from biological aspect of ancestor with PANTHER:PTN000055427 nuclear membrane ; GO:0031965 | inferred from biological aspect of ancestor with PANTHER:PTN000055427	Ran GTPase binding ; GO:0008536 | inferred from electronic annotation with InterPro:IPR001494 nuclear localization sequence binding ; GO:0008139 | inferred from biological aspect of ancestor with PANTHER:PTN000055427 protein transporter activity ; GO:0008565 | inferred from biological aspect of ancestor with PANTHER:PTN000055427
HMJ23009	61230	FBgn0035693	CG8219	-	-	NLS-bearing protein import into nucleus ; GO:0006607 | inferred from biological aspect of ancestor with PANTHER:PTN000055427 ribosomal protein import into nucleus ; GO:0006610 | inferred from biological aspect of ancestor with PANTHER:PTN000055427	nuclear periphery ; GO:0034399 | inferred from biological aspect of ancestor with PANTHER:PTN000055427 cytoplasm ; GO:0005737 | inferred from biological aspect of ancestor with PANTHER:PTN000055427 nuclear membrane ; GO:0031965 | inferred from biological aspect of ancestor with PANTHER:PTN000055427	Ran GTPase binding ; GO:0008536 | inferred from electronic annotation with InterPro:IPR001494 nuclear localization sequence binding ; GO:0008139 | inferred from biological aspect of ancestor with PANTHER:PTN000055427 protein transporter activity ; GO:0008565 | inferred from biological aspect of ancestor with PANTHER:PTN000055427
HMJ23239	61347	FBgn0033317	CG8635	-	-	cytoplasmic translation ; GO:0002181 | inferred from biological aspect of ancestor with PANTHER:PTN000293621	cytosol ; GO:0005829 | inferred from biological aspect of ancestor with PANTHER:PTN000293621	metal ion binding ; GO:0046872 | inferred from electronic annotation with InterPro:IPR000571 molecular_function ; GO:0003674 | no biological data available
HMC04735	57428	FBgn0034479	CG8654	-	Insufficient genetic data for FlyBase to solicit a summary. [Date last reviewed: 2016-06-30]	transmembrane transport ; GO:0055085 | inferred from electronic annotation with InterPro:IPR005828	integral component of membrane ; GO:0016021 | inferred from electronic annotation with InterPro:IPR005828	transmembrane transporter activity ; GO:0022857 | inferred from electronic annotation with InterPro:IPR005828
HMS02436	42603	FBgn0035318	CG9018	-	Insufficient genetic data for FlyBase to solicit a summary. [Date last reviewed: 2016-06-30]	mRNA 3'-end processing ; GO:0031124 | inferred from biological aspect of ancestor with PANTHER:PTN000279186	RNA polymerase II, holoenzyme ; GO:0016591 | inferred from biological aspect of ancestor with PANTHER:PTN000279186	RNA polymerase II complex binding ; GO:0000993 | inferred from biological aspect of ancestor with PANTHER:PTN000279186
HMS02537	42845	FBgn0040931	CG9034	-	Insufficient genetic data for FlyBase to solicit a summary. [Date last reviewed: 2016-06-30]	-	-	-
HMJ21729	53700	FBgn0040931	CG9034	-	Insufficient genetic data for FlyBase to solicit a summary. [Date last reviewed: 2016-06-30]	-	-	-
HMC04436	56994	FBgn0035216	CG9168	-	Insufficient genetic data for FlyBase to solicit a summary. [Date last reviewed: 2016-06-30]	multicellular organism reproduction ; GO:0032504 | inferred from high throughput expression pattern multicellular organism reproduction ; GO:0032504 | inferred from biological aspect of ancestor with PANTHER:PTN000104511	extracellular space ; GO:0005615 | inferred from high throughput direct assay	catalytic activity ; GO:0003824 | inferred from electronic annotation with InterPro:IPR017849, InterPro:IPR017850
HMJ23256	61813	FBgn0035218	CG9173	-	Insufficient genetic data for FlyBase to solicit a summary. [Date last reviewed: 2016-06-30]	-	-	-
HMJ03129	50907	FBgn0032925	CG9246	-	Insufficient genetic data for FlyBase to solicit a summary. [Date last reviewed: 2016-06-30]	ribosomal large subunit biogenesis ; GO:0042273 | inferred from biological aspect of ancestor with PANTHER:PTN000293925 negative regulation of histone acetylation ; GO:0035067 | inferred from biological aspect of ancestor with PANTHER:PTN000976013 negative regulation of transcription by RNA polymerase II ; GO:0000122 | inferred from biological aspect of ancestor with PANTHER:PTN000976013	Noc2p-Noc3p complex ; GO:0030691 | inferred from biological aspect of ancestor with PANTHER:PTN000293925 nucleolus ; GO:0005730 | inferred from biological aspect of ancestor with PANTHER:PTN000293925 nucleoplasm ; GO:0005654 | inferred from biological aspect of ancestor with PANTHER:PTN000293925 nucleolus ; GO:0005730 | inferred from sequence or structural similarity with HGNC:24517 Noc1p-Noc2p c…	repressing transcription factor binding ; GO:0070491 | inferred from biological aspect of ancestor with PANTHER:PTN000976013 histone binding ; GO:0042393 | inferred from biological aspect of ancestor with PANTHER:PTN000976013 transcription corepressor activity ; GO:0003714 | inferred from biological aspect of ancestor with PANTHER:PTN000976013
HMC05230	62223	FBgn0030592	CG9514	-	Insufficient genetic data for FlyBase to solicit a summary. [Date last reviewed: 2016-06-30]	oxidation-reduction process ; GO:0055114 | inferred from electronic annotation with InterPro:IPR000172, InterPro:IPR007867, InterPro:IPR023753 ecdysteroid metabolic process ; GO:0045455 | inferred from sequence or structural similarity with Eo inferred from genomic context with Eo	-	oxidoreductase activity, acting on CH-OH group of donors ; GO:0016614 | inferred from electronic annotation with InterPro:IPR000172, InterPro:IPR007867 flavin adenine dinucleotide binding ; GO:0050660 | inferred from electronic annotation with InterPro:IPR000172 oxidoreductase activity ; GO:0016491 | inferred from sequence or structural similarity with Eo
HMC03879	55185	FBgn0027563	CG9631	-	Insufficient genetic data for FlyBase to solicit a summary. [Date last reviewed: 2016-06-30]	proteolysis ; GO:0006508 | inferred from electronic annotation with InterPro:IPR001254, InterPro:IPR018114 proteolysis ; GO:0006508 | inferred from sequence model	-	serine-type endopeptidase activity ; GO:0004252 | inferred from electronic annotation with InterPro:IPR001254, InterPro:IPR018114 endopeptidase activity ; GO:0004175 | inferred from sequence model
HMS02831	44110	FBgn0031485	CG9643	-	-	-	-	methyltransferase activity ; GO:0008168 | inferred from electronic annotation with InterPro:IPR026635
HMC05023	60030	FBgn0030775	CG9673	-	Insufficient genetic data for FlyBase to solicit a summary. [Date last reviewed: 2016-06-30]	proteolysis ; GO:0006508 | inferred from biological aspect of ancestor with PANTHER:PTN001207268	extracellular space ; GO:0005615 | inferred from biological aspect of ancestor with PANTHER:PTN001207268	serine-type endopeptidase activity ; GO:0004252 | inferred from biological aspect of ancestor with PANTHER:PTN001207268 serine-type endopeptidase activity ; GO:0004252 | NOT inferred from key residues
HMC03431	51857	FBgn0031428	CG9886	-	Insufficient genetic data for FlyBase to solicit a summary. [Date last reviewed: 2016-06-30]	protein phosphorylation ; GO:0006468 | inferred from biological aspect of ancestor with PANTHER:PTN000259988 protein phosphorylation ; GO:0006468 | inferred from sequence or structural similarity with HGNC:24247 protein phosphorylation ; GO:0006468 | inferred from sequence or structural similarity with UniProtKB:Q8IVS8	cytoplasm ; GO:0005737 | inferred from sequence or structural similarity with UniProtKB:Q8IVS8 cytoplasm ; GO:0005737 | inferred from biological aspect of ancestor with PANTHER:PTN000259988	glycerate kinase activity ; GO:0008887 | inferred from sequence or structural similarity with UniProtKB:Q8IVS8 glycerate kinase activity ; GO:0008887 | inferred from biological aspect of ancestor with PANTHER:PTN000259988 glycerate kinase activity ; GO:0008887 | inferred from sequence or structural similarity with HGNC:24247
HMJ23260	61817	FBgn0030757	CG9902	-	Insufficient genetic data for FlyBase to solicit a summary. [Date last reviewed: 2016-06-30]	-	-	-
HMC05154	62148	FBgn0031441	CG9962	-	-	protein phosphorylation ; GO:0006468 | inferred from direct assay peptidyl-serine phosphorylation ; GO:0018105 | inferred from biological aspect of ancestor with PANTHER:PTN002628885 Wnt signaling pathway ; GO:0016055 | inferred from biological aspect of ancestor with PANTHER:PTN002276147 positive regulation of proteasomal ubiquitin-dependent protein catabolic process ; GO:0032436 | inferred from…	cytoplasm ; GO:0005737 | inferred from direct assay cytoplasm ; GO:0005737 | inferred from biological aspect of ancestor with PANTHER:PTN000225966 nucleus ; GO:0005634 | inferred from biological aspect of ancestor with PANTHER:PTN000225966	ATP binding ; GO:0005524 | inferred from electronic annotation with InterPro:IPR000719, InterPro:IPR017441 protein serine/threonine kinase activity ; GO:0004674 | inferred from direct assay protein serine/threonine kinase activity ; GO:0004674 | inferred from biological aspect of ancestor with PANTHER:PTN002628885 protein serine/threonine kinase activity ; GO:0004674 | non-traceable author statem…
HMC05021	60028	FBgn0000303	ChAT	Choline acetyltransferase	Choline acetyltransferase (ChAT) catalyzes the biosynthesis of the neurotransmitter acetylcholine. ChAT is considered to be a specific marker for cholinergic neurons. [Date last reviewed: 2016-06-09]	neuromuscular synaptic transmission ; GO:0007274 | inferred from biological aspect of ancestor with PANTHER:PTN000502016 acetylcholine biosynthetic process ; GO:0008292 | inferred from biological aspect of ancestor with PANTHER:PTN000502016 acetylcholine biosynthetic process ; GO:0008292 | inferred from mutant phenotype neuromuscular synaptic transmission ; GO:0007274 | inferred from mutant pheno…	nucleus ; GO:0005634 | non-traceable author statement neuron projection ; GO:0043005 | inferred from biological aspect of ancestor with PANTHER:PTN000502016 cytosol ; GO:0005829 | non-traceable author statement cytoplasm ; GO:0005737 | inferred from biological aspect of ancestor with PANTHER:PTN000502016	choline O-acetyltransferase activity ; GO:0004102 | inferred from mutant phenotype choline O-acetyltransferase activity ; GO:0004102 | inferred from biological aspect of ancestor with PANTHER:PTN000502016 choline O-acetyltransferase activity ; GO:0004102 | inferred from direct assay
HMS01900	38984	FBgn0010808	Chchd3	Coiled-coil-helix-coiled-coil-helix domain containing 3	Coiled-coil-helix-coiled-coil-helix domain containing 3 (Chchd3) is a mitochondrial inner membrane protein that is required for mitochondrial fusion. Loss of ChChd3 leads to inactivation of Hippo activity, decreased tissue growth, cell proliferation defects, oxidative stress and JNK pathway activation. [Date last reviewed: 2017-05-18]	mitochondrial fusion ; GO:0008053 | inferred from mutant phenotype cristae formation ; GO:0042407 | inferred from mutant phenotype	mitochondrial inner membrane ; GO:0005743 | inferred from direct assay	-
HMJ23773	62377	FBgn0035499	Chd64	Chd64	-	smooth muscle contraction ; GO:0006939 | inferred from sequence or structural similarity juvenile hormone mediated signaling pathway ; GO:0035626 | inferred from mutant phenotype	striated muscle thin filament ; GO:0005865 | inferred from sequence or structural similarity	juvenile hormone response element binding ; GO:0070594 | inferred from direct assay actin binding ; GO:0003779 | inferred from sequence or structural similarity protein binding ; GO:0005515 | inferred from physical interaction with Fkbp39
HMC04781	57470	FBgn0044324	Chro	Chromator	Chromator (Chro) encodes a chromodomain protein that is required for proper microtubule spindle formation. It is important for normal cell cycle progression, functioning as a spatial regulator of cell cycle factors. [Date last reviewed: 2018-11-08]	chromosome organization ; GO:0051276 | inferred from mutant phenotype chromosome segregation ; GO:0007059 | inferred from mutant phenotype mitotic spindle organization ; GO:0007052 | inferred from mutant phenotype metaphase plate congression ; GO:0051310 | inferred from mutant phenotype mitotic spindle assembly checkpoint ; GO:0007094 | inferred from mutant phenotype metamorphosis ; GO:0007552 | …	centrosome ; GO:0005813 | inferred from direct assay spindle ; GO:0005819 | inferred from direct assay nucleus ; GO:0005634 | inferred from direct assay polytene chromosome interband ; GO:0005705 | inferred from direct assay polytene chromosome ; GO:0005700 | inferred from direct assay	histone binding ; GO:0042393 | inferred from physical interaction with His1 protein binding ; GO:0005515 | inferred from physical interaction with UniProtKB:A1Z8P9 protein binding ; GO:0005515 | inferred from physical interaction with UniProtKB:Q9VCH5,UniProtKB:Q9VGA4,UniProtKB:Q9VP57
HMC04541	57160	FBgn0250907	Cht10	Chitinase 10	Insufficient genetic data for FlyBase to solicit a summary. [Date last reviewed: 2016-06-30]	carbohydrate metabolic process ; GO:0005975 | inferred from electronic annotation with InterPro:IPR001223, InterPro:IPR001579, InterPro:IPR013781 chitin catabolic process ; GO:0006032 | inferred from biological aspect of ancestor with PANTHER:PTN000126545 chitin catabolic process ; GO:0006032 | non-traceable author statement	extracellular region ; GO:0005576 | inferred from biological aspect of ancestor with PANTHER:PTN000126545	chitinase activity ; GO:0004568 | non-traceable author statement chitinase activity ; GO:0004568 | inferred from biological aspect of ancestor with PANTHER:PTN000126545 chitin binding ; GO:0008061 | inferred from biological aspect of ancestor with PANTHER:PTN000126545
HMS02636	42943	FBgn0000259	CkIIbeta	Casein kinase II beta subunit	Casein kinase II Î² subunit (CkIIÎ²) is the regulatory subunit of the CKII holoenzyme, a protein serine/threonine kinase composed of a and b subunits. Interactions have been reported with other kinases (e.g., PIP4K and S6kII), the orb RNA-binding protein, the Hedgehog signaling pathway and clock proteins such as tim and per. CkIIÎ² functions in oogenesis, neurogenesis, development (brain and othe…	eclosion rhythm ; GO:0008062 | traceable author statement protein phosphorylation ; GO:0006468 | non-traceable author statement rhythmic behavior ; GO:0007622 | traceable author statement circadian rhythm ; GO:0007623 | inferred from mutant phenotype mushroom body development ; GO:0016319 | inferred from mutant phenotype intracellular mRNA localization involved in pattern specification process ; …	cytoplasm ; GO:0005737 | inferred from direct assay protein kinase CK2 complex ; GO:0005956 | inferred from biological aspect of ancestor with PANTHER:PTN000201362 nucleus ; GO:0005634 | colocalizes_with inferred from biological aspect of ancestor with PANTHER:PTN000201365 cytosol ; GO:0005829 | inferred from direct assay nucleus ; GO:0005634 | inferred from direct assay cytoplasm ; GO:0005737 | …	protein kinase activity ; GO:0004672 | non-traceable author statement protein serine/threonine kinase activity ; GO:0004674 | inferred from direct assay protein kinase regulator activity ; GO:0019887 | inferred from direct assay protein serine/threonine kinase activity ; GO:0004674 | contributes_to inferred from biological aspect of ancestor with PANTHER:PTN000201362 protein kinase regulator acti…
HMJ23659	62302	FBgn0015621	Clp	Clipper	Insufficient genetic data for FlyBase to solicit a summary. [Date last reviewed: 2016-06-30]	pre-mRNA cleavage required for polyadenylation ; GO:0098789 | inferred from biological aspect of ancestor with PANTHER:PTN000559780 mRNA polyadenylation ; GO:0006378 | inferred from sequence or structural similarity with protein_id:AAD00321	mRNA cleavage and polyadenylation specificity factor complex ; GO:0005847 | inferred from sequence or structural similarity with protein_id:AAD00321	zinc ion binding ; GO:0008270 | inferred from electronic annotation with InterPro:IPR001878 nucleic acid binding ; GO:0003676 | inferred from electronic annotation with InterPro:IPR001878, InterPro:IPR036875 endoribonuclease activity ; GO:0004521 | inferred from direct assay
HMC04534	57154	FBgn0015621	Clp	Clipper	Insufficient genetic data for FlyBase to solicit a summary. [Date last reviewed: 2016-06-30]	pre-mRNA cleavage required for polyadenylation ; GO:0098789 | inferred from biological aspect of ancestor with PANTHER:PTN000559780 mRNA polyadenylation ; GO:0006378 | inferred from sequence or structural similarity with protein_id:AAD00321	mRNA cleavage and polyadenylation specificity factor complex ; GO:0005847 | inferred from sequence or structural similarity with protein_id:AAD00321	zinc ion binding ; GO:0008270 | inferred from electronic annotation with InterPro:IPR001878 nucleic acid binding ; GO:0003676 | inferred from electronic annotation with InterPro:IPR001878, InterPro:IPR036875 endoribonuclease activity ; GO:0004521 | inferred from direct assay
HMJ21427	54004	FBgn0040232	cmet	CENP-meta	-	regulation of cell cycle ; GO:0051726 | inferred from mutant phenotype mitotic metaphase plate congression ; GO:0007080 | inferred from mutant phenotype mitotic metaphase plate congression ; GO:0007080 | inferred from biological aspect of ancestor with PANTHER:PTN001947122 microtubule-based movement ; GO:0007018 | inferred from biological aspect of ancestor with PANTHER:PTN000648413 microtubule-b…	microtubule ; GO:0005874 | inferred from biological aspect of ancestor with PANTHER:PTN000648413 kinesin complex ; GO:0005871 | inferred from biological aspect of ancestor with PANTHER:PTN000648413 condensed chromosome outer kinetochore ; GO:0000940 | non-traceable author statement kinesin complex ; GO:0005871 | inferred from sequence or structural similarity kinetochore ; GO:0000776 | inferred f…	ATP binding ; GO:0005524 | inferred from electronic annotation with InterPro:IPR001752, InterPro:IPR019821 ATP-dependent microtubule motor activity, plus-end-directed ; GO:0008574 | inferred from sequence or structural similarity with HGNC:1856 microtubule binding ; GO:0008017 | inferred from biological aspect of ancestor with PANTHER:PTN000648413 microtubule motor activity ; GO:0003777 | inferre…
HMJ21485	54042	FBgn0032922	Coq3	Coenzyme Q3	-	ubiquinone biosynthetic process ; GO:0006744 | inferred from electronic annotation with InterPro:IPR010233 wound healing ; GO:0042060 | inferred from mutant phenotype	-	2-polyprenyl-6-methoxy-1,4-benzoquinone methyltransferase activity ; GO:0008425 | inferred from electronic annotation with InterPro:IPR010233
HMC03565	53336	FBgn0050493	Coq9	Coenzyme Q9	-	ubiquinone biosynthetic process ; GO:0006744 | inferred from biological aspect of ancestor with PANTHER:PTN000484410 ubiquinone biosynthetic process ; GO:0006744 | inferred from sequence or structural similarity with UniProtKB:Q05779	mitochondrial inner membrane ; GO:0005743 | inferred from biological aspect of ancestor with PANTHER:PTN000484410 mitochondrial inner membrane ; GO:0005743 | inferred from sequence or structural similarity with UniProtKB:Q05779	lipid binding ; GO:0008289 | inferred from biological aspect of ancestor with PANTHER:PTN000484410
HMC03418	51845	FBgn0010434	cora	coracle	-	adult somatic muscle development ; GO:0007527 | inferred from mutant phenotype cell-cell junction organization ; GO:0045216 | traceable author statement cell adhesion involved in heart morphogenesis ; GO:0061343 | inferred from mutant phenotype actomyosin structure organization ; GO:0031032 | inferred from biological aspect of ancestor with PANTHER:PTN001150527 dorsal closure ; GO:0007391 | non-t…	cytoskeleton ; GO:0005856 | inferred from electronic annotation with InterPro:IPR000299, InterPro:IPR008379 septate junction ; GO:0005918 | non-traceable author statement plasma membrane ; GO:0005886 | inferred from direct assay septate junction ; GO:0005918 | inferred from direct assay smooth septate junction ; GO:0005920 | inferred from direct assay plasma membrane ; GO:0005886 | inferred from …	actin binding ; GO:0003779 | inferred from electronic annotation with InterPro:IPR008379 structural molecule activity ; GO:0005198 | inferred from electronic annotation with InterPro:IPR008379 cytoskeletal protein binding ; GO:0008092 | inferred from sequence or structural similarity
HMC04889	57572	FBgn0040529	COX7A	Cytochrome c oxidase subunit 7A	Insufficient genetic data for FlyBase to solicit a summary. [Date last reviewed: 2016-06-30]	mitochondrial respirasome assembly ; GO:0097250 | inferred from biological aspect of ancestor with PANTHER:PTN000828143 mitochondrial electron transport, cytochrome c to oxygen ; GO:0006123 | inferred from sequence or structural similarity with UniProtKB:P24310 regulation of oxidative phosphorylation ; GO:0002082 | inferred from biological aspect of ancestor with PANTHER:PTN000828143	mitochondrion ; GO:0005739 | inferred from high throughput direct assay mitochondrial respiratory chain complex IV ; GO:0005751 | inferred from sequence or structural similarity with UniProtKB:P24310	cytochrome-c oxidase activity ; GO:0004129 | inferred from sequence or structural similarity with UniProtKB:P24310
HMC03910	55696	FBgn0261065	Cpsf73	Cleavage and polyadenylation specificity factor 73	Insufficient genetic data for FlyBase to solicit a summary. [Date last reviewed: 2016-06-30]	mRNA 3'-end processing by stem-loop binding and cleavage ; GO:0006398 | inferred from mutant phenotype mRNA polyadenylation ; GO:0006378 | inferred from mutant phenotype mRNA polyadenylation ; GO:0006378 | inferred from sequence or structural similarity with protein_id:AAB70268 mRNA 3'-end processing by stem-loop binding and cleavage ; GO:0006398 | inferred from biological aspect of ancestor with…	mRNA cleavage and polyadenylation specificity factor complex ; GO:0005847 | inferred from biological aspect of ancestor with PANTHER:PTN000128607 mRNA cleavage and polyadenylation specificity factor complex ; GO:0005847 | inferred from sequence or structural similarity with protein_id:AAB70268 mRNA cleavage and polyadenylation specificity factor complex ; GO:0005847 | non-traceable author stateme…	endoribonuclease activity ; GO:0004521 | inferred from biological aspect of ancestor with PANTHER:PTN000128607 RNA binding ; GO:0003723 | inferred from biological aspect of ancestor with PANTHER:PTN000128607 protein binding ; GO:0005515 | inferred from physical interaction with UniProtKB:Q8MSU4 5'-3' exonuclease activity ; GO:0008409 | inferred from biological aspect of ancestor with PANTHER:PTN0…
HMJ23935	62455	FBgn0035383	CPT2	Carnitine palmitoyltransferase 2	Insufficient genetic data for FlyBase to solicit a summary. [Date last reviewed: 2016-06-30]	fatty acid beta-oxidation ; GO:0006635 | inferred from mutant phenotype triglyceride homeostasis ; GO:0070328 | inferred from mutant phenotype fatty acid beta-oxidation ; GO:0006635 | inferred from biological aspect of ancestor with PANTHER:PTN000501944 response to starvation ; GO:0042594 | inferred from mutant phenotype ketone body biosynthetic process ; GO:0046951 | inferred from mutant phenoty…	mitochondrion ; GO:0005739 | inferred from biological aspect of ancestor with PANTHER:PTN000501944	carnitine O-palmitoyltransferase activity ; GO:0004095 | inferred from biological aspect of ancestor with PANTHER:PTN000501944
HMS02442	42017	FBgn0041605	cpx	complexin	Complexin is a presynaptic cytosolic protein that regulates SNARE complex assembly and fuction. It has both positive and negative roles in synaptic transmission, serving as the synaptic vesicle fusion clamp and as an activator of evoked release. [Date last reviewed: 2016-06-23]	synaptic vesicle exocytosis ; GO:0016079 | inferred from biological aspect of ancestor with PANTHER:PTN000422952 neuromuscular synaptic transmission ; GO:0007274 | inferred from mutant phenotype synaptic vesicle exocytosis ; GO:0016079 | inferred from mutant phenotype synaptic vesicle exocytosis ; GO:0016079 | inferred from sequence or structural similarity regulation of neurotransmitter secretio…	SNARE complex ; GO:0031201 | inferred from biological aspect of ancestor with PANTHER:PTN001047612 neuromuscular junction ; GO:0031594 | inferred from direct assay type I terminal bouton ; GO:0061174 | inferred from direct assay terminal bouton ; GO:0043195 | inferred from direct assay membrane ; GO:0016020 | inferred from sequence or structural similarity with UniProtKB:Q8R1B5 presynaptic active…	syntaxin binding ; GO:0019905 | inferred from electronic annotation with InterPro:IPR008849 neurotransmitter transporter activity ; GO:0005326 | inferred from sequence or structural similarity with UniProtKB:P63040 SNARE binding ; GO:0000149 | inferred from biological aspect of ancestor with PANTHER:PTN001047612
HMJ02218	42562	FBgn0004396	CrebA	Cyclic-AMP response element binding protein A	Cyclic-AMP response element binding protein A (CrebA) is a leucine-zipper transcription factor. CrebA upregulates genes encoding protein components of the canonical secretory pathway and tissue-specific genes in the salivary gland and epidermis. [Date last reviewed: 2016-09-01]	salivary gland development ; GO:0007431 | traceable author statement salivary gland development ; GO:0007431 | inferred from mutant phenotype larval chitin-based cuticle development ; GO:0008363 | inferred from mutant phenotype positive regulation of transcription by RNA polymerase II ; GO:0045944 | inferred from direct assay chitin-based larval cuticle pattern formation ; GO:0035293 | inferred f…	nucleus ; GO:0005634 | inferred from direct assay polytene chromosome ; GO:0005700 | inferred from direct assay	cAMP response element binding ; GO:0035497 | inferred from biological aspect of ancestor with PANTHER:PTN001119596 enhancer sequence-specific DNA binding ; GO:0001158 | inferred from direct assay DNA-binding transcription factor activity ; GO:0003700 | inferred from direct assay sequence-specific DNA binding ; GO:0043565 | inferred from direct assay DNA binding ; GO:0003677 | inferred from direct…
HMJ22842	60472	FBgn0021738	Crg-1	Circadianly Regulated Gene	-	regulation of transcription, DNA-templated ; GO:0006355 | inferred from electronic annotation with InterPro:IPR001766	-	sequence-specific DNA binding ; GO:0043565 | inferred from electronic annotation with InterPro:IPR001766 DNA-binding transcription factor activity ; GO:0003700 | inferred from electronic annotation with InterPro:IPR001766
HMS02202	41669	FBgn0020309	crol	crooked legs	Crooked legs is a zinc finger transcription factor induced by 20-hydroxyecdysone at the onset of metamorphosis. It regulates wg transcription and cell cycle progression in the Drosophila wing. Its over-expression in the eye accelerates the cell cycle and de-represses silenced genes. [Date last reviewed: 2016-08-25]	imaginal disc-derived wing morphogenesis ; GO:0007476 | inferred from mutant phenotype inferred from genetic interaction with if inferred from genetic interaction with mys cell adhesion ; GO:0007155 | inferred from mutant phenotype positive regulation of mitotic cell cycle ; GO:0045931 | inferred from mutant phenotype negative regulation of transcription, DNA-templated ; GO:0045892 | inferred fro…	nucleus ; GO:0005634 | inferred from direct assay heterochromatin ; GO:0000792 | inferred from direct assay	nucleic acid binding ; GO:0003676 | inferred from electronic annotation with InterPro:IPR013087
HMJ02217	42561	FBgn0036746	Crtc	CREB-regulated transcription coactivator	CREB-regulated transcription coactivator (CRTC) is a highly conserved transcriptional coactivator of cAMP-response element-binding protein (CREB). Its nuclear localization is regulated by several factors including intracellular cAMP or calcium levels, or calcineurin. Sik family kinases also phosphorylate to inhibit CRTC and, consequently, control energy homeostais and lipid metabolism. [Date last…	protein homotetramerization ; GO:0051289 | inferred from electronic annotation with InterPro:IPR024783 positive regulation of CREB transcription factor activity ; GO:0032793 | inferred from biological aspect of ancestor with PANTHER:PTN001006040 response to starvation ; GO:0042594 | inferred from mutant phenotype response to oxidative stress ; GO:0006979 | inferred from mutant phenotype positive …	cytoplasm ; GO:0005737 | inferred from biological aspect of ancestor with PANTHER:PTN001006040 nucleus ; GO:0005634 | inferred from direct assay nucleus ; GO:0005634 | inferred from biological aspect of ancestor with PANTHER:PTN001006040 cytosol ; GO:0005829 | inferred from direct assay	cAMP response element binding protein binding ; GO:0008140 | inferred from biological aspect of ancestor with PANTHER:PTN001006040
HMS02392	41991	FBgn0028837	CSN6	COP9 signalosome subunit 6	COP9 signalosome subunit 6 is the subunit 6 of the COP9 signalosome (CSN). The CSN plays a central role in the regulation of E3-cullin RING ubiquitin ligases. [Date last reviewed: 2016-06-30]	female germ-line stem cell population maintenance ; GO:0036099 | inferred from mutant phenotype protein stabilization ; GO:0050821 | inferred from mutant phenotype male germ-line cyst encapsulation ; GO:0048140 | inferred from mutant phenotype germ cell development ; GO:0007281 | inferred from mutant phenotype protein deneddylation ; GO:0000338 | inferred from sequence or structural similarity wi…	COP9 signalosome ; GO:0008180 | inferred from biological aspect of ancestor with PANTHER:PTN000057105 COP9 signalosome ; GO:0008180 | inferred from sequence or structural similarity with MGI:MGI:1349439	protein dimerization activity ; GO:0046983 | inferred from direct assay zinc ion binding ; GO:0008270 | NOT inferred from direct assay metallopeptidase activity ; GO:0008237 | NOT inferred from key residues
HMS02554	42862	FBgn0011760	ctp	cut up	Cut up (Ctp) is the 8 kDa (LC8/DLC1) subunit of the cytoplasmic Dynein, as well as the Myosin V. It homodimerizes and binds to a variety of proteins. It is involved in both dynein-dependent and independent functions such as cell viability, axonal guidance, spermatid growth and individualization, and regulation of spermatogonial divisions. [Date last reviewed: 2016-09-01]	sperm individualization ; GO:0007291 | inferred from mutant phenotype establishment of mitotic spindle orientation ; GO:0000132 | inferred from mutant phenotype spermatid nucleus elongation ; GO:0007290 | inferred from mutant phenotype microtubule anchoring at centrosome ; GO:0034454 | inferred from mutant phenotype imaginal disc-derived wing morphogenesis ; GO:0007476 | inferred from mutant phen…	cytoplasm ; GO:0005737 | inferred from direct assay cytoplasmic dynein complex ; GO:0005868 | inferred from direct assay centriole ; GO:0005814 | inferred from direct assay dynein complex ; GO:0030286 | inferred from biological aspect of ancestor with PANTHER:PTN000223361 dynein complex ; GO:0030286 | inferred from direct assay dynein complex ; GO:0030286 | inferred from sequence or structural si…	dynein light intermediate chain binding ; GO:0051959 | inferred from direct assay protein binding ; GO:0005515 | inferred from physical interaction with UniProtKB:Q9V9Y9 protein homodimerization activity ; GO:0042803 | inferred from direct assay ATP-dependent microtubule motor activity, plus-end-directed ; GO:0008574 | contributes_to inferred from biological aspect of ancestor with PANTHER:PTN000…
HMS02554	42862	FBgn0011760	ctp	cut up	Cut up (Ctp) is the 8 kDa (LC8/DLC1) subunit of the cytoplasmic Dynein, as well as the Myosin V. It homodimerizes and binds to a variety of proteins. It is involved in both dynein-dependent and independent functions such as cell viability, axonal guidance, spermatid growth and individualization, and regulation of spermatogonial divisions. [Date last reviewed: 2016-09-01]	sperm individualization ; GO:0007291 | inferred from mutant phenotype establishment of mitotic spindle orientation ; GO:0000132 | inferred from mutant phenotype spermatid nucleus elongation ; GO:0007290 | inferred from mutant phenotype microtubule anchoring at centrosome ; GO:0034454 | inferred from mutant phenotype imaginal disc-derived wing morphogenesis ; GO:0007476 | inferred from mutant phen…	cytoplasm ; GO:0005737 | inferred from direct assay cytoplasmic dynein complex ; GO:0005868 | inferred from direct assay centriole ; GO:0005814 | inferred from direct assay dynein complex ; GO:0030286 | inferred from biological aspect of ancestor with PANTHER:PTN000223361 dynein complex ; GO:0030286 | inferred from direct assay dynein complex ; GO:0030286 | inferred from sequence or structural si…	dynein light intermediate chain binding ; GO:0051959 | inferred from direct assay protein binding ; GO:0005515 | inferred from physical interaction with UniProtKB:Q9V9Y9 protein homodimerization activity ; GO:0042803 | inferred from direct assay ATP-dependent microtubule motor activity, plus-end-directed ; GO:0008574 | contributes_to inferred from biological aspect of ancestor with PANTHER:PTN000…
HMJ02094	53378	FBgn0266452	CTPsyn	CTP synthase	CTP synthase (CTPsyn) is the rate limiting enzyme for the de novo synthesis of the nucleotide CTP. CTPsyn forms an evolutionarily conserved filamentous structure termed the cytoophidium. CTPsyn acts downstream of Myc and is required for Myc-mediated cell size control. [Date last reviewed: 2016-09-01]	CTP biosynthetic process ; GO:0006241 | inferred from sequence or structural similarity with HGNC:2519 CTP biosynthetic process ; GO:0006241 | inferred from sequence or structural similarity with UniProtKB:P17812 larval lymph gland hemopoiesis ; GO:0035167 | inferred from mutant phenotype CTP biosynthetic process ; GO:0006241 | inferred from biological aspect of ancestor with PANTHER:PTN000167473…	cytoplasm ; GO:0005737 | inferred from biological aspect of ancestor with PANTHER:PTN000167476 cytoplasm ; GO:0005737 | inferred from direct assay cytoophidium ; GO:0097268 | inferred from direct assay cytosol ; GO:0005829 | inferred from high throughput direct assay cytoophidium ; GO:0097268 | inferred from biological aspect of ancestor with PANTHER:PTN000167476	identical protein binding ; GO:0042802 | inferred from biological aspect of ancestor with PANTHER:PTN000167473 CTP synthase activity ; GO:0003883 | inferred from biological aspect of ancestor with PANTHER:PTN000167473 CTP synthase activity ; GO:0003883 | inferred from sequence or structural similarity with HGNC:2519 CTP synthase activity ; GO:0003883 | inferred from sequence or structural similar…
HMS01656	37514	FBgn0000395	cv-2	crossveinless 2	Crossveinless 2 (Cv-2) is a secreted protein that binds BMPs, the BMP receptor tkv and Heparan Sulfate Proteoglycans. Cv-2 either promotes BMP signaling, as in the developing crossveins, or inhibits BMP signaling, as in the early embryo. [Date last reviewed: 2016-06-09]	regulation of BMP signaling pathway ; GO:0030510 | inferred from genetic interaction with sog inferred from physical interaction with dpp inferred from physical interaction with tkv inferred from physical interaction with gbb imaginal disc-derived wing vein specification ; GO:0007474 | inferred from mutant phenotype imaginal disc-derived wing morphogenesis ; GO:0007476 | inferred from mutant phen…	cell surface ; GO:0009986 | inferred from direct assay	BMP binding ; GO:0036122 | inferred from physical interaction with dpp inferred from physical interaction with gbb heparan sulfate proteoglycan binding ; GO:0043395 | inferred from genetic interaction with botv BMP receptor binding ; GO:0070700 | inferred from physical interaction with tkv
HMS02135	40887	FBgn0031452	Cwc25	Cwc25	Insufficient genetic data for FlyBase to solicit a summary. [Date last reviewed: 2016-06-30]	-	cellular_component ; GO:0005575 | no biological data available	molecular_function ; GO:0003674 | no biological data available
HMJ21345	53963	FBgn0013773	Cyp6a22	Cyp6a22	Insufficient genetic data for FlyBase to solicit a summary. [Date last reviewed: 2016-06-30]	oxidation-reduction process ; GO:0055114 | inferred from electronic annotation with InterPro:IPR001128, InterPro:IPR002401, InterPro:IPR017972	-	oxidoreductase activity, acting on paired donors, with incorporation or reduction of molecular oxygen ; GO:0016705 | inferred from electronic annotation with InterPro:IPR001128, InterPro:IPR002401, InterPro:IPR017972 heme binding ; GO:0020037 | inferred from electronic annotation with InterPro:IPR001128, InterPro:IPR002401 iron ion binding ; GO:0005506 | inferred from electronic annotation with I…
HMC03940	55253	FBgn0010220	Dbp45A	DEAD box protein 45A	Insufficient genetic data for FlyBase to solicit a summary. [Date last reviewed: 2016-06-30]	regulation of alternative mRNA splicing, via spliceosome ; GO:0000381 | inferred from high throughput mutant phenotype	nucleus ; GO:0005634 | inferred by curator from GO:0000381	ATP binding ; GO:0005524 | inferred from electronic annotation with InterPro:IPR011545 nucleic acid binding ; GO:0003676 | inferred from electronic annotation with InterPro:IPR011545 ATP-dependent RNA helicase activity ; GO:0004004 | inferred from sequence or structural similarity with SGD:S000001212
HMS02594	42901	FBgn0039016	Dcr-1	Dicer-1	-	RNA interference ; GO:0016246 | traceable author statement dendrite morphogenesis ; GO:0048813 | inferred from mutant phenotype dsRNA transport ; GO:0033227 | inferred from mutant phenotype production of siRNA involved in RNA interference ; GO:0030422 | inferred from biological aspect of ancestor with PANTHER:PTN000383724 production of miRNAs involved in gene silencing by miRNA ; GO:0035196 | inf…	RISC-loading complex ; GO:0070578 | inferred from sequence or structural similarity with UniProtKB:Q9UPY3 RISC complex ; GO:0016442 | inferred from biological aspect of ancestor with PANTHER:PTN000383724 micro-ribonucleoprotein complex ; GO:0035068 | inferred from sequence or structural similarity with UniProtKB:Q9UPY3 cytoplasm ; GO:0005737 | inferred from direct assay nucleus ; GO:0005634 | col…	single-stranded RNA binding ; GO:0003727 | inferred from direct assay protein binding ; GO:0005515 | inferred from physical interaction with piwi inferred from physical interaction with vas ribonuclease III activity ; GO:0004525 | inferred from biological aspect of ancestor with PANTHER:PTN000383724 protein binding ; GO:0005515 | inferred from physical interaction with loqs double-stranded RNA bi…
HMJ22897	60499	FBgn0033206	DCTN4-p62	Dynactin 4, p62 subunit	-	nuclear migration ; GO:0007097 | inferred from biological aspect of ancestor with PANTHER:PTN000989859 microtubule-based movement ; GO:0007018 | inferred from sequence or structural similarity	dynactin complex ; GO:0005869 | inferred from biological aspect of ancestor with PANTHER:PTN000989859 dynactin complex ; GO:0005869 | inferred from sequence or structural similarity	-
HMJ24065	62521	FBgn0031601	Dim1	Dim1	-	mRNA splicing, via spliceosome ; GO:0000398 | inferred from sequence or structural similarity with SGD:S000006286 mRNA splicing, via spliceosome ; GO:0000398 | inferred by curator from GO:0071011	U5 snRNP ; GO:0005682 | inferred from biological aspect of ancestor with PANTHER:PTN000248409 U4/U6 x U5 tri-snRNP complex ; GO:0046540 | inferred from biological aspect of ancestor with PANTHER:PTN000248409 small nuclear ribonucleoprotein complex ; GO:0030532 | inferred from sequence or structural similarity with SGD:S000006286 precatalytic spliceosome ; GO:0071011 | inferred from high throughpu…	molecular_function ; GO:0003674 | no biological data available
HMC03851	55171	FBgn0031601	Dim1	Dim1	-	mRNA splicing, via spliceosome ; GO:0000398 | inferred from sequence or structural similarity with SGD:S000006286 mRNA splicing, via spliceosome ; GO:0000398 | inferred by curator from GO:0071011	U5 snRNP ; GO:0005682 | inferred from biological aspect of ancestor with PANTHER:PTN000248409 U4/U6 x U5 tri-snRNP complex ; GO:0046540 | inferred from biological aspect of ancestor with PANTHER:PTN000248409 small nuclear ribonucleoprotein complex ; GO:0030532 | inferred from sequence or structural similarity with SGD:S000006286 precatalytic spliceosome ; GO:0071011 | inferred from high throughpu…	molecular_function ; GO:0003674 | no biological data available
HMS01879	38965	FBgn0052791	DIP-alpha	Dpr-interacting protein alpha	Insufficient genetic data for FlyBase to solicit a summary. [Date last reviewed: 2017-07-13]	synapse organization ; GO:0050808 | inferred from expression pattern	neuron projection membrane ; GO:0032589 | inferred from direct assay integral component of plasma membrane ; GO:0005887 | inferred from sequence model	-
HMS01954	39035	FBgn0001624	dlg1	discs large 1	-	synaptic growth at neuromuscular junction ; GO:0051124 | inferred from mutant phenotype gravitaxis ; GO:0042332 | inferred from mutant phenotype nervous system development ; GO:0007399 | inferred from mutant phenotype cell fate specification ; GO:0001708 | inferred from mutant phenotype septate junction assembly ; GO:0019991 | traceable author statement establishment or maintenance of epithelial …	tricellular tight junction ; GO:0061689 | inferred from direct assay lateral plasma membrane ; GO:0016328 | inferred from direct assay plasma membrane ; GO:0005886 | inferred from high throughput direct assay septate junction ; GO:0005918 | traceable author statement membrane ; GO:0016020 | traceable author statement plasma membrane ; GO:0005886 | inferred from mutant phenotype type Ib terminal b…	ionotropic glutamate receptor binding ; GO:0035255 | inferred from biological aspect of ancestor with PANTHER:PTN001501163 epidermal growth factor receptor binding ; GO:0005154 | traceable author statement guanylate kinase activity ; GO:0004385 | traceable author statement protein binding ; GO:0005515 | inferred from physical interaction with gukh
HMJ23170	61334	FBgn0032363	Dlg5	Discs large 5	Insufficient genetic data for FlyBase to solicit a summary. [Date last reviewed: 2016-06-30]	border follicle cell migration ; GO:0007298 | inferred from mutant phenotype antimicrobial humoral response ; GO:0019730 | inferred from mutant phenotype	apical part of cell ; GO:0045177 | inferred from direct assay plasma membrane ; GO:0005886 | inferred from high throughput direct assay	-
HMJ21620	52951	FBgn0262619	DNAlig1	DNA ligase 1	-	DNA biosynthetic process ; GO:0071897 | inferred from electronic annotation with InterPro:IPR000977 DNA recombination ; GO:0006310 | inferred from electronic annotation with InterPro:IPR000977, InterPro:IPR012308, InterPro:IPR012309, InterPro:IPR012310 DNA ligation involved in DNA repair ; GO:0051103 | inferred from electronic annotation with InterPro:IPR016059 Okazaki fragment processing involve…	mitochondrion ; GO:0005739 | inferred from biological aspect of ancestor with PANTHER:PTN000048763 cytoplasm ; GO:0005737 | inferred from direct assay nucleus ; GO:0005634 | inferred from biological aspect of ancestor with PANTHER:PTN000048763 nuclear replication fork ; GO:0043596 | NOT inferred from direct assay cytoplasm ; GO:0005737 | inferred from biological aspect of ancestor with PANTHER:PT…	ATP binding ; GO:0005524 | inferred from electronic annotation with InterPro:IPR000977, InterPro:IPR012310 DNA binding ; GO:0003677 | inferred from electronic annotation with InterPro:IPR012308 DNA ligase (ATP) activity ; GO:0003910 | inferred from biological aspect of ancestor with PANTHER:PTN000048695 DNA ligase (ATP) activity ; GO:0003910 | inferred from direct assay
HMJ23033	61254	FBgn0259113	DNApol-alpha180	DNA polymerase alpha 180kD	DNA polymerase Î± 180kD is the catalytic subunit of DNA polymerase Î±, responsible for initial synthesis on the leading strand and on each Okazai fragment of the lagging strand. [Date last reviewed: 2016-06-23]	DNA replication ; GO:0006260 | inferred from direct assay leading strand elongation ; GO:0006272 | inferred from biological aspect of ancestor with PANTHER:PTN000035348 synthesis of RNA primer involved in mitotic DNA replication ; GO:1902981 | inferred from biological aspect of ancestor with PANTHER:PTN000035348 mitotic DNA replication initiation ; GO:1902975 | inferred from biological aspect of …	alpha DNA polymerase:primase complex ; GO:0005658 | inferred from biological aspect of ancestor with PANTHER:PTN000035348 alpha DNA polymerase:primase complex ; GO:0005658 | inferred from direct assay nucleus ; GO:0005634 | inferred from direct assay	nucleoside binding ; GO:0001882 | inferred from electronic annotation with InterPro:IPR015088 DNA-directed DNA polymerase activity ; GO:0003887 | inferred from direct assay DNA-directed DNA polymerase activity ; GO:0003887 | non-traceable author statement purine nucleotide binding ; GO:0017076 | inferred from biological aspect of ancestor with PANTHER:PTN000035348 protein heterodimerization activ…
HMC03570	53341	FBgn0259113	DNApol-alpha180	DNA polymerase alpha 180kD	DNA polymerase Î± 180kD is the catalytic subunit of DNA polymerase Î±, responsible for initial synthesis on the leading strand and on each Okazai fragment of the lagging strand. [Date last reviewed: 2016-06-23]	DNA replication ; GO:0006260 | inferred from direct assay leading strand elongation ; GO:0006272 | inferred from biological aspect of ancestor with PANTHER:PTN000035348 synthesis of RNA primer involved in mitotic DNA replication ; GO:1902981 | inferred from biological aspect of ancestor with PANTHER:PTN000035348 mitotic DNA replication initiation ; GO:1902975 | inferred from biological aspect of …	alpha DNA polymerase:primase complex ; GO:0005658 | inferred from biological aspect of ancestor with PANTHER:PTN000035348 alpha DNA polymerase:primase complex ; GO:0005658 | inferred from direct assay nucleus ; GO:0005634 | inferred from direct assay	nucleoside binding ; GO:0001882 | inferred from electronic annotation with InterPro:IPR015088 DNA-directed DNA polymerase activity ; GO:0003887 | inferred from direct assay DNA-directed DNA polymerase activity ; GO:0003887 | non-traceable author statement purine nucleotide binding ; GO:0017076 | inferred from biological aspect of ancestor with PANTHER:PTN000035348 protein heterodimerization activ…
HMS03720	54460	FBgn0000482	dor	deep orange	-	cell division ; GO:0051301 | inferred from mutant phenotype pteridine biosynthetic process ; GO:0006728 | inferred from mutant phenotype autophagosome maturation ; GO:0097352 | inferred from mutant phenotype endosome to lysosome transport ; GO:0008333 | inferred from mutant phenotype lysosome organization ; GO:0007040 | inferred from biological aspect of ancestor with PANTHER:PTN001154188 lysosom…	endosome ; GO:0005768 | inferred from direct assay lysosome ; GO:0005764 | inferred from direct assay CORVET complex ; GO:0033263 | inferred from direct assay synapse ; GO:0045202 | inferred from mutant phenotype HOPS complex ; GO:0030897 | inferred from sequence or structural similarity with SGD:S000004138 HOPS complex ; GO:0030897 | inferred from mutant phenotype HOPS complex ; GO:0030897 | inf…	protein binding ; GO:0005515 | inferred from physical interaction with UniProtKB:A4V4S5,UniProtKB:M9PF72,UniProtKB:Q9VHG1,UniProtKB:Q9VRX2 inferred from physical interaction with UniProtKB:Q9V3I2 inferred from physical interaction with UniProtKB:Q9VRX2 zinc ion binding ; GO:0008270 | inferred from sequence model protein binding ; GO:0005515 | inferred from physical interaction with UniProtKB:Q9Y1…
HMS02241	41677	FBgn0002183	dre4	dre4	Dre4 is a chromatin regulator that, along with Ssrp, forms the protein complex, FACT (facilitates chromatin transcription). FACT facilitates GAGA factor-directed chromatin remodeling. [Date last reviewed: 2016-12-01]	transcription elongation from RNA polymerase II promoter ; GO:0006368 | inferred from biological aspect of ancestor with PANTHER:PTN000360139 regulation of chromatin assembly or disassembly ; GO:0001672 | inferred from mutant phenotype positive regulation of transcription elongation from RNA polymerase II promoter ; GO:0032968 | inferred from mutant phenotype positive regulation of transcription …	polytene chromosome puff ; GO:0005703 | inferred from direct assay FACT complex ; GO:0035101 | traceable author statement FACT complex ; GO:0035101 | inferred from biological aspect of ancestor with PANTHER:PTN000360139 FACT complex ; GO:0035101 | inferred from direct assay nucleolus ; GO:0005730 | inferred from direct assay nucleus ; GO:0005634 | inferred from direct assay	nucleosome binding ; GO:0031491 | inferred from biological aspect of ancestor with PANTHER:PTN000360139 chromatin binding ; GO:0003682 | inferred from direct assay nucleosome binding ; GO:0031491 | inferred from direct assay histone binding ; GO:0042393 | inferred from biological aspect of ancestor with PANTHER:PTN000360139
HMJ22371	58286	FBgn0000546	EcR	Ecdysone receptor	Ecdysone receptor (EcR) interacts with usp to form the nuclear ecdysone receptor heterodimer, which modulates, in conjunction with co-activators and co-repressors, the activities of hundreds of genes in a tissue- and stage-specific way. EcR is widely expressed in embryonic and larval tissues and in some adult tissues where its activities (modulated by the hormone ecdysone) trigger both molting an…	cholesterol homeostasis ; GO:0042632 | inferred from mutant phenotype pupariation ; GO:0035073 | inferred from mutant phenotype oogenesis ; GO:0048477 | non-traceable author statement epidermis development ; GO:0008544 | inferred from mutant phenotype mushroom body development ; GO:0016319 | inferred from mutant phenotype ecdysone receptor-mediated signaling pathway ; GO:0035076 | inferred from m…	RNA polymerase II transcription factor complex ; GO:0090575 | inferred from biological aspect of ancestor with PANTHER:PTN000637751 polytene chromosome ; GO:0005700 | inferred from direct assay nucleus ; GO:0005634 | inferred from direct assay ecdysone receptor holocomplex ; GO:0008230 | traceable author statement cytoplasm ; GO:0005737 | inferred from direct assay repressor ecdysone receptor com…	zinc ion binding ; GO:0008270 | inferred from electronic annotation with InterPro:IPR001628, InterPro:IPR013088 RNA polymerase II regulatory region sequence-specific DNA binding ; GO:0000977 | inferred from direct assay DNA binding ; GO:0003677 | non-traceable author statement protein binding ; GO:0005515 | inferred from physical interaction with Utx nuclear receptor activity ; GO:0004879 | infer…
HMS05003	60012	FBgn0003731	Egfr	Epidermal growth factor receptor	Epidermal growth factor receptor (Egfr) is the transmembrane tyrosine kinase receptor for signaling ligands in the TGFÎ± family (grk, spi, vn, and Krn), which utilises the intracellular MAP kinase pathway. Egfr roles include growth regulation, cell survival and developmental patterning. [Date last reviewed: 2016-10-06]	epidermal growth factor receptor signaling pathway ; GO:0007173 | inferred from genetic interaction with Ras85D epidermal growth factor receptor signaling pathway ; GO:0007173 | inferred from direct assay negative regulation of apoptotic signaling pathway ; GO:2001234 | inferred from genetic interaction with rpr positive regulation of border follicle cell migration ; GO:1903688 | inferred from ge…	cytoneme ; GO:0035230 | colocalizes_with inferred from direct assay integral component of plasma membrane ; GO:0005887 | inferred from biological aspect of ancestor with PANTHER:PTN002356460 basal plasma membrane ; GO:0009925 | inferred from biological aspect of ancestor with PANTHER:PTN000698827 receptor complex ; GO:0043235 | inferred from biological aspect of ancestor with PANTHER:PTN002356460…	protein domain specific binding ; GO:0019904 | inferred from electronic annotation with InterPro:IPR000308 ATP binding ; GO:0005524 | inferred from electronic annotation with InterPro:IPR000719, InterPro:IPR006211, InterPro:IPR017441 protein binding ; GO:0005515 | inferred from physical interaction with ec epidermal growth factor-activated receptor activity ; GO:0005006 | inferred from direct ass…
HMS02632	42939	FBgn0034180	Ehbp1	Eps15 homology domain containing protein-binding protein 1	-	sensory organ precursor cell division ; GO:0045035 | inferred from mutant phenotype regulation of basement membrane organization ; GO:0110011 | inferred from mutant phenotype positive regulation of Notch signaling pathway ; GO:0045747 | inferred from mutant phenotype basolateral protein secretion ; GO:0110010 | inferred from mutant phenotype basement membrane constituent secretion ; GO:0061864 | …	cell cortex ; GO:0005938 | inferred from direct assay	actin binding ; GO:0003779 | inferred from sequence or structural similarity
HMC04556	57174	FBgn0035423	eIF1	eukaryotic translation initiation factor 1	Insufficient genetic data for FlyBase to solicit a summary. [Date last reviewed: 2016-06-30]	cellular response to hypoxia ; GO:0071456 | inferred from mutant phenotype formation of translation preinitiation complex ; GO:0001731 | inferred from sequence or structural similarity with SGD:S000005188	eukaryotic 43S preinitiation complex ; GO:0016282 | inferred from biological aspect of ancestor with PANTHER:PTN000044132 eukaryotic 43S preinitiation complex ; GO:0016282 | inferred from sequence or structural similarity with SGD:S000005188 multi-eIF complex ; GO:0043614 | inferred from sequence or structural similarity with SGD:S000005188	translation initiation factor activity ; GO:0003743 | inferred from biological aspect of ancestor with PANTHER:PTN000044132 ribosomal small subunit binding ; GO:0043024 | inferred from biological aspect of ancestor with PANTHER:PTN000044132 RNA binding ; GO:0003723 | inferred from biological aspect of ancestor with PANTHER:PTN000044131 translation initiation factor activity ; GO:0003743 | inferre…
HMC03768	55624	FBgn0039726	eIF2Balpha	eukaryotic translation initiation factor 2B subunit alpha	Insufficient genetic data for FlyBase to solicit a summary. [Date last reviewed: 2016-06-30]	translational initiation ; GO:0006413 | inferred from sequence or structural similarity with SGD:S000001734 translational initiation ; GO:0006413 | inferred from sequence or structural similarity	eukaryotic translation initiation factor 2B complex ; GO:0005851 | inferred from sequence or structural similarity eukaryotic translation initiation factor 2B complex ; GO:0005851 | inferred from sequence or structural similarity with SGD:S000001734 cytosol ; GO:0005829 | inferred from sequence or structural similarity	translation initiation factor activity ; GO:0003743 | inferred from sequence or structural similarity with SGD:S000001734 translation initiation factor activity ; GO:0003743 | inferred from sequence or structural similarity enzyme regulator activity ; GO:0030234 | inferred from genetic interaction with SGD:S000001734
HMC03465	51891	FBgn0034858	eIF2Bdelta	eukaryotic translation initiation factor 2B subunit delta	Insufficient genetic data for FlyBase to solicit a summary. [Date last reviewed: 2016-06-30]	translational initiation ; GO:0006413 | inferred from sequence or structural similarity with SGD:S000003315 translational initiation ; GO:0006413 | inferred from sequence or structural similarity	eukaryotic translation initiation factor 2B complex ; GO:0005851 | inferred from sequence or structural similarity cytosol ; GO:0005829 | inferred from sequence or structural similarity eukaryotic translation initiation factor 2B complex ; GO:0005851 | inferred from sequence or structural similarity with SGD:S000003315	translation initiation factor activity ; GO:0003743 | inferred from sequence or structural similarity translation initiation factor activity ; GO:0003743 | inferred from sequence or structural similarity with SGD:S000003315
HMJ21745	53022	FBgn0014849	Eig71Ei	Eig71Ei	-	defense response to bacterium ; GO:0042742 | inferred from sequence or structural similarity with MGI:MGI:94880 metamorphosis ; GO:0007552 | inferred from expression pattern	extracellular region ; GO:0005576 | inferred from sequence model	-
HMC04773	57868	FBgn0264490	Eip93F	Ecdysone-induced protein 93F	Ecdysone-induced protein 93F is a DNA binding protein that plays an import role in the regulation of cell death during fly metamorphosis. Its transcription is steroid-regulated. [Date last reviewed: 2016-06-16]	cellular response to hypoxia ; GO:0071456 | inferred from mutant phenotype positive regulation of transcription, DNA-templated ; GO:0045893 | traceable author statement	nucleus ; GO:0005634 | non-traceable author statement polytene chromosome ; GO:0005700 | traceable author statement polytene chromosome ; GO:0005700 | non-traceable author statement transcriptionally active chromatin ; GO:0035327 | colocalizes_with inferred from direct assay nucleus ; GO:0005634 | traceable author statement nucleus ; GO:0005634 | inferred from direct assay	DNA binding ; GO:0003677 | inferred from electronic annotation with InterPro:IPR007889, InterPro:IPR009057
HMJ23520	61937	FBgn0035849	ERR	estrogen-related receptor	Estrogen-related receptor directly induces a transcriptional switch in mid-embryogenesis, up-regulating the genes that act in biosynthetic pathways associated with aerobic glycolysis. This nuclear receptor establishes the metabolic state that supports growth during larval stages. [Date last reviewed: 2016-08-25]	carbohydrate metabolic process ; GO:0005975 | inferred from direct assay spermatogenesis ; GO:0007283 | inferred from mutant phenotype regulation of transcription by RNA polymerase II ; GO:0006357 | inferred from mutant phenotype	nucleus ; GO:0005634 | inferred from sequence or structural similarity with UniProtKB:P03372	DNA-binding transcription factor activity ; GO:0003700 | inferred from electronic annotation with InterPro:IPR001628 steroid hormone receptor activity ; GO:0003707 | inferred from electronic annotation with InterPro:IPR001723, InterPro:IPR024178, InterPro:IPR027289 zinc ion binding ; GO:0008270 | inferred from electronic annotation with InterPro:IPR001628, InterPro:IPR013088, InterPro:IPR024178 s…
HMS02657	43285	FBgn0023506	Es2	Es2	Insufficient genetic data for FlyBase to solicit a summary. [Date last reviewed: 2016-06-30]	nervous system development ; GO:0007399 | inferred from sequence or structural similarity with UniProtKB:O70279 mRNA splicing, via spliceosome ; GO:0000398 | inferred by curator from GO:0071013	catalytic step 2 spliceosome ; GO:0071013 | inferred from high throughput direct assay nucleus ; GO:0005634 | inferred from sequence or structural similarity with MGI:MGI:107854	-
HMC03744	55731	FBgn0011554	etaTry	etaTrypsin	Î·Trypsin is a putative digestive enzyme with predicted serine-type endopeptidase activity. The gene is highly expressed and enriched in the midgut, an organ involved in digestion. [Date last reviewed: 2016-06-30]	proteolysis ; GO:0006508 | inferred from electronic annotation with InterPro:IPR001254, InterPro:IPR001314, InterPro:IPR018114 proteolysis ; GO:0006508 | inferred from sequence model	cytoplasm ; GO:0005737 | inferred from biological aspect of ancestor with PANTHER:PTN001208729	serine-type endopeptidase activity ; GO:0004252 | inferred from sequence or structural similarity serine-type endopeptidase activity ; GO:0004252 | inferred from sequence model serine-type endopeptidase activity ; GO:0004252 | inferred from biological aspect of ancestor with PANTHER:PTN001208729
HMS01818	38350	FBgn0262740	Evi5	Ecotropic viral integration site 5	-	regulation of cell migration ; GO:0030334 | inferred from direct assay intracellular protein transport ; GO:0006886 | inferred from biological aspect of ancestor with PANTHER:PTN000537561 border follicle cell migration ; GO:0007298 | inferred from mutant phenotype regulation of GTPase activity ; GO:0043087 | inferred from sequence or structural similarity with Evi5 regulation of protein localizat…	cytoplasm ; GO:0005737 | inferred from direct assay recycling endosome ; GO:0055037 | colocalizes_with inferred from direct assay vesicle ; GO:0031982 | inferred from direct assay Golgi apparatus ; GO:0005794 | inferred from direct assay	Rab GTPase binding ; GO:0017137 | inferred from physical interaction with Rab6 Rab GTPase binding ; GO:0017137 | inferred from physical interaction with Rab11 GTPase activator activity ; GO:0005096 | inferred from direct assay inferred from physical interaction with Rab11 Rab GTPase binding ; GO:0017137 | inferred from biological aspect of ancestor with PANTHER:PTN000537561 GTPase activator activ…
HMS04515	57314	FBgn0000320	eya	eyes absent	eyes absent (eya) encodes a transcriptional cofactor that physically interacts with several other retinal determination proteins, including those encoded by ey, dac, and so. The product of eya regulates eye, gonad, and brain development as well as axon pathfinding. [Date last reviewed: 2018-09-06]	histone dephosphorylation ; GO:0016576 | inferred from biological aspect of ancestor with PANTHER:PTN000022641 innate immune response ; GO:0045087 | inferred from genetic interaction with DNaseII ovarian follicle cell development ; GO:0030707 | inferred from mutant phenotype positive regulation of gene expression ; GO:0010628 | inferred from mutant phenotype gonad development ; GO:0008406 | infer…	cytoplasm ; GO:0005737 | inferred from high throughput direct assay nucleus ; GO:0005634 | inferred from direct assay cytosol ; GO:0005829 | inferred from direct assay nucleus ; GO:0005634 | inferred from biological aspect of ancestor with PANTHER:PTN000022641	protein tyrosine phosphatase activity, metal-dependent ; GO:0030946 | inferred from direct assay transcription factor binding ; GO:0008134 | inferred from physical interaction with so phosphoprotein phosphatase activity ; GO:0004721 | inferred from mutant phenotype transcription coactivator activity ; GO:0003713 | inferred from mutant phenotype protein tyrosine phosphatase activity ; GO:0004725 |…
HMJ02126	42553	FBgn0003062	Fib	Fibrillarin	Fibrillarin is an rRNA 2'-O-methyltransferase required for pre-rRNA processing. [Date last reviewed: 2016-06-30]	rRNA methylation ; GO:0031167 | inferred from biological aspect of ancestor with PANTHER:PTN000036740 histone glutamine methylation ; GO:1990258 | inferred from biological aspect of ancestor with PANTHER:PTN000036740 box C/D snoRNA 3'-end processing ; GO:0000494 | inferred from biological aspect of ancestor with PANTHER:PTN000036740	dense fibrillar component ; GO:0001651 | inferred from sequence or structural similarity with UniProtKB:P22509 small-subunit processome ; GO:0032040 | inferred from biological aspect of ancestor with PANTHER:PTN000036740 small nucleolar ribonucleoprotein complex ; GO:0005732 | inferred from sequence or structural similarity nucleolus ; GO:0005730 | inferred from direct assay box C/D snoRNP comple…	RNA binding ; GO:0003723 | inferred from biological aspect of ancestor with PANTHER:PTN000036740 rRNA methyltransferase activity ; GO:0008649 | inferred from biological aspect of ancestor with PANTHER:PTN000036740 histone-glutamine methyltransferase activity ; GO:1990259 | inferred from biological aspect of ancestor with PANTHER:PTN000036740
HMS04465	57022	FBgn0000711	flw	flapwing	-	protein dephosphorylation ; GO:0006470 | non-traceable author statement chromosome segregation ; GO:0007059 | inferred from mutant phenotype negative regulation of JNK cascade ; GO:0046329 | inferred from genetic interaction with bsk inferred from genetic interaction with puc imaginal disc-derived wing morphogenesis ; GO:0007476 | inferred from mutant phenotype mesoderm development ; GO:0007498 |…	protein phosphatase type 1 complex ; GO:0000164 | inferred from electronic annotation with InterPro:IPR037979, InterPro:IPR037981 PTW/PP1 phosphatase complex ; GO:0072357 | inferred from electronic annotation with InterPro:IPR037979 cytoplasm ; GO:0005737 | inferred from biological aspect of ancestor with PANTHER:PTN000185232 nucleus ; GO:0005634 | inferred from biological aspect of ancestor with…	protein serine/threonine phosphatase activity ; GO:0004722 | inferred from biological aspect of ancestor with PANTHER:PTN000185232 protein serine/threonine phosphatase activity ; GO:0004722 | non-traceable author statement myosin phosphatase activity ; GO:0017018 | inferred from direct assay
HMS02748	44032	FBgn0031633	Fnta	Farnesyl transferase alpha	Insufficient genetic data for FlyBase to solicit a summary. [Date last reviewed: 2016-06-30]	positive regulation of Ras protein signal transduction ; GO:0046579 | inferred from high throughput genetic interaction with Ras85D protein geranylgeranylation ; GO:0018344 | inferred from biological aspect of ancestor with PANTHER:PTN000122903 protein farnesylation ; GO:0018343 | inferred from biological aspect of ancestor with PANTHER:PTN000122903	protein farnesyltransferase complex ; GO:0005965 | inferred from biological aspect of ancestor with PANTHER:PTN000122903 cytoplasm ; GO:0005737 | inferred from biological aspect of ancestor with PANTHER:PTN000122800 CAAX-protein geranylgeranyltransferase complex ; GO:0005953 | inferred from biological aspect of ancestor with PANTHER:PTN000122903	protein farnesyltransferase activity ; GO:0004660 | contributes_to inferred from biological aspect of ancestor with PANTHER:PTN000122903 CAAX-protein geranylgeranyltransferase activity ; GO:0004662 | contributes_to inferred from biological aspect of ancestor with PANTHER:PTN000122903
HMC03968	55281	FBgn0024236	foi	fear-of-intimacy	-	cell migration ; GO:0016477 | inferred from mutant phenotype zinc ion import across plasma membrane ; GO:0071578 | inferred from biological aspect of ancestor with PANTHER:PTN000953562 gonadal mesoderm development ; GO:0007506 | inferred from mutant phenotype central nervous system development ; GO:0007417 | inferred from mutant phenotype pole cell migration ; GO:0007280 | traceable author statem…	plasma membrane ; GO:0005886 | inferred from direct assay cell surface ; GO:0009986 | inferred from direct assay integral component of plasma membrane ; GO:0005887 | inferred from biological aspect of ancestor with PANTHER:PTN000953562 integral component of plasma membrane ; GO:0005887 | inferred from direct assay basolateral plasma membrane ; GO:0016323 | inferred from direct assay	zinc ion transmembrane transporter activity ; GO:0005385 | inferred from direct assay zinc ion transmembrane transporter activity ; GO:0005385 | inferred from biological aspect of ancestor with PANTHER:PTN000953562
HMS04486	57041	FBgn0000721	for	foraging	Foraging (For) is a serine/threonine kinase and a member of the Protein Kinase G (PKG) family. For roles include feeding, locomotion, metabolism, development, olfactory habituation, learning and memory, stress, social behavior, as well as Malpighian tubule, heart, muscle and synaptic function. [Date last reviewed: 2016-12-01]	regulation of heart contraction ; GO:0008016 | inferred from mutant phenotype motor neuron axon guidance ; GO:0008045 | inferred from mutant phenotype regulation of response to food ; GO:0032095 | inferred from mutant phenotype larval feeding behavior ; GO:0030536 | traceable author statement protein phosphorylation ; GO:0006468 | non-traceable author statement short-term memory ; GO:0007614 | in…	plasma membrane ; GO:0005886 | inferred from direct assay cytosol ; GO:0005829 | inferred from high throughput direct assay cytoplasm ; GO:0005737 | inferred from direct assay	ATP binding ; GO:0005524 | inferred from electronic annotation with InterPro:IPR000719, InterPro:IPR000961, InterPro:IPR002290, InterPro:IPR002374, InterPro:IPR017441 cGMP-dependent protein kinase activity ; GO:0004692 | inferred from direct assay protein serine/threonine kinase activity ; GO:0004674 | non-traceable author statement
HMS02181	40933	FBgn0001086	fzy	fizzy	fizzy (fzy) encodes WD40 domain protein required for the full ubiquitin ligase activity of the anaphase-promoting complex/cyclosome (APC/C) in mitosis and meiosis. The product of fzy functions to target substrates for destruction and drive metaphase and anaphase transition. [Date last reviewed: 2018-09-13]	mitotic cell cycle ; GO:0000278 | inferred from high throughput mutant phenotype anaphase-promoting complex-dependent catabolic process ; GO:0031145 | inferred from direct assay female meiosis I ; GO:0007144 | inferred from genetic interaction with cort female meiosis II ; GO:0007147 | inferred from mutant phenotype anaphase-promoting complex-dependent catabolic process ; GO:0031145 | inferred fr…	kinetochore ; GO:0000776 | inferred from direct assay centrosome ; GO:0005813 | inferred from direct assay anaphase-promoting complex ; GO:0005680 | inferred from direct assay kinetochore ; GO:0000776 | traceable author statement cytoplasm ; GO:0005737 | traceable author statement anaphase-promoting complex ; GO:0005680 | inferred from sequence or structural similarity with HGNC:24824 spindle ; G…	anaphase-promoting complex binding ; GO:0010997 | inferred from electronic annotation with InterPro:IPR033010 ubiquitin-protein transferase activator activity ; GO:0097027 | inferred from electronic annotation with InterPro:IPR033010 ubiquitin protein ligase activity ; GO:0061630 | inferred from direct assay
HMS01848	38379	FBgn0051148	Gba1a	Glucocerebrosidase 1a	Insufficient genetic data for FlyBase to solicit a summary. [Date last reviewed: 2016-06-30]	adult locomotory behavior ; GO:0008344 | inferred from genetic interaction with Gba1b memory ; GO:0007613 | inferred from genetic interaction with Gba1b neuron cellular homeostasis ; GO:0070050 | inferred from genetic interaction with Gba1b determination of adult lifespan ; GO:0008340 | inferred from genetic interaction with Gba1b glucosylceramide catabolic process ; GO:0006680 | inferred from bi…	-	glucosylceramidase activity ; GO:0004348 | inferred from biological aspect of ancestor with PANTHER:PTN001667738 glucosylceramidase activity ; GO:0004348 | inferred from genetic interaction with Gba1b hydrolase activity ; GO:0016787 | inferred from biological aspect of ancestor with PANTHER:PTN000869634 inferred from biological aspect of ancestor with PANTHER:PTN002476147
HMJ23341	61852	FBgn0261703	gce	germ cell-expressed bHLH-PAS	Germ cell-expressed bHLH-PAS is a bHLH-PAS domain transcription factor paralogous to Met. It is a receptor for the sesquiterpenoid juvenile hormone. [Date last reviewed: 2016-08-18]	positive regulation of transcription by RNA polymerase II ; GO:0045944 | inferred from mutant phenotype juvenile hormone mediated signaling pathway ; GO:0035626 | inferred from mutant phenotype regulation of transcription, DNA-templated ; GO:0006355 | inferred from sequence or structural similarity with Met negative regulation of programmed cell death ; GO:0043069 | inferred from genetic interact…	transcription factor complex ; GO:0005667 | inferred from electronic annotation with InterPro:IPR001067 cytoplasm ; GO:0005737 | inferred from electronic annotation with InterPro:IPR001067 nucleus ; GO:0005634 | inferred from electronic annotation with InterPro:IPR001067 nucleus ; GO:0005634 | inferred by curator from GO:0003700	protein heterodimerization activity ; GO:0046982 | inferred from physical interaction with ftz-f1 nuclear receptor activity ; GO:0004879 | inferred from mutant phenotype DNA-binding transcription factor activity ; GO:0003700 | inferred from sequence or structural similarity with Met juvenile hormone binding ; GO:0005500 | inferred from direct assay transcription factor binding ; GO:0008134 | infe…
HMS02610	42917	FBgn0038692	Gdn1	Gdown1	-	-	RNA polymerase II, holoenzyme ; GO:0016591 | inferred from electronic annotation with InterPro:IPR026213	-
HMS02954	50720	FBgn0033081	geminin	geminin	geminin (geminin) encodes a protein that interacts with the replication factor encoded by dup and regulates the Egfr pathway, DNA replication and chromosome ploidy. [Date last reviewed: 2018-03-08]	negative regulation of DNA replication ; GO:0008156 | inferred from direct assay negative regulation of DNA replication ; GO:0008156 | inferred from mutant phenotype negative regulation of DNA replication ; GO:0008156 | inferred from direct assay inferred from mutant phenotype endomitotic cell cycle ; GO:0007113 | inferred from mutant phenotype eggshell chorion gene amplification ; GO:0007307 | t…	nucleus ; GO:0005634 | inferred from direct assay	-
HMS05289	63015	FBgn0038149	GILT1	Gamma-interferon-inducible lysosomal thiol reductase 1	-	positive regulation of defense response to bacterium ; GO:1900426 | inferred from mutant phenotype oxidation-reduction process ; GO:0055114 | inferred from sequence model with Pfam:PF03227	plasma membrane ; GO:0005886 | inferred from direct assay inferred from high throughput direct assay	disulfide oxidoreductase activity ; GO:0015036 | inferred from sequence model with Pfam:PF03227
HMJ22052	58115	FBgn0001987	Gli	Gliotactin	Gliotactin is a transmembrane protein localized at tricellular junctions. It is necessary for septate junction and permeability barrier formation. [Date last reviewed: 2016-06-23]	spermatid differentiation ; GO:0048515 | inferred from mutant phenotype cell adhesion involved in heart morphogenesis ; GO:0061343 | inferred from mutant phenotype synaptic vesicle endocytosis ; GO:0048488 | inferred from biological aspect of ancestor with PANTHER:PTN000168538 modulation of chemical synaptic transmission ; GO:0050804 | inferred from biological aspect of ancestor with PANTHER:PTN0…	cell surface ; GO:0009986 | inferred from biological aspect of ancestor with PANTHER:PTN000168538 septate junction ; GO:0005918 | inferred from direct assay tricellular tight junction ; GO:0061689 | inferred from direct assay synapse ; GO:0045202 | inferred from biological aspect of ancestor with PANTHER:PTN000168538 plasma membrane ; GO:0005886 | inferred from direct assay integral component of …	neurexin family protein binding ; GO:0042043 | inferred from biological aspect of ancestor with PANTHER:PTN000168538 carboxylic ester hydrolase activity ; GO:0052689 | inferred from sequence or structural similarity signaling receptor activity ; GO:0038023 | inferred from biological aspect of ancestor with PANTHER:PTN000168538
HMS00341	32350	FBgn0015391	glu	gluon	Gluon (Glu) is a subunit of the multiprotein complex condensin that is required for chromosome condensation and sister chromatid segregation. Glu contributes to nervous system development and glucose metabolism. [Date last reviewed: 2017-06-15]	sister chromatid segregation ; GO:0000819 | inferred from mutant phenotype mitotic cell cycle ; GO:0000278 | inferred from mutant phenotype chromosome condensation ; GO:0030261 | inferred from mutant phenotype mitotic sister chromatid segregation ; GO:0000070 | inferred from sequence or structural similarity with SGD:S000004076 inferred from mutant phenotype mitotic chromosome condensation ; GO:0…	condensin complex ; GO:0000796 | non-traceable author statement cytoplasm ; GO:0005737 | inferred from direct assay condensin complex ; GO:0000796 | inferred from sequence or structural similarity with HGNC:14013 nucleus ; GO:0005634 | inferred from direct assay condensin complex ; GO:0000796 | inferred from direct assay chromatin ; GO:0000785 | inferred from direct assay condensin complex ; GO:0…	ATP binding ; GO:0005524 | inferred from electronic annotation with InterPro:IPR010935 ATPase activity ; GO:0016887 | inferred from sequence or structural similarity with SGD:S000004076 chromatin binding ; GO:0003682 | inferred from sequence or structural similarity with SGD:S000004076 protein heterodimerization activity ; GO:0046982 | inferred from sequence or structural similarity with HGNC:140…
HMJ21245	53912	FBgn0031661	Gmd	GDP-mannose 4,6-dehydratase	-	GDP-mannose metabolic process ; GO:0019673 | inferred from biological aspect of ancestor with PANTHER:PTN000041603 'de novo' GDP-L-fucose biosynthetic process ; GO:0042351 | inferred from biological aspect of ancestor with PANTHER:PTN000041603 Notch signaling pathway ; GO:0007219 | inferred from mutant phenotype GDP-L-fucose biosynthetic process ; GO:0042350 | inferred from direct assay oogenesis…	cytoplasm ; GO:0005737 | inferred from biological aspect of ancestor with PANTHER:PTN000041603	GDP-mannose 4,6-dehydratase activity ; GO:0008446 | inferred from biological aspect of ancestor with PANTHER:PTN000041603 GDP-mannose 4,6-dehydratase activity ; GO:0008446 | inferred from direct assay
HMS02868	44572	FBgn0004913	Gnf1	Germ line transcription factor 1	Germ line transcription factor 1 (Gnf1) encodes the largest subunit of the replication factor C (RFC). RFC is a clamp loader that loads a sliding clamp (PCNA) trimer to the DNA replication fork. [Date last reviewed: 2018-09-13]	DNA replication ; GO:0006260 | inferred from electronic annotation with InterPro:IPR008921, InterPro:IPR012178, InterPro:IPR013725 DNA repair ; GO:0006281 | inferred from electronic annotation with InterPro:IPR012178 DNA replication ; GO:0006260 | non-traceable author statement dendrite morphogenesis ; GO:0048813 | inferred from mutant phenotype	DNA replication factor C complex ; GO:0005663 | inferred from electronic annotation with InterPro:IPR012178, InterPro:IPR013725 DNA replication factor C complex ; GO:0005663 | non-traceable author statement nucleus ; GO:0005634 | inferred from biological aspect of ancestor with PANTHER:PTN000121684 nucleus ; GO:0005634 | inferred from direct assay	ATP binding ; GO:0005524 | inferred from electronic annotation with InterPro:IPR003959, InterPro:IPR012178, InterPro:IPR013725 DNA clamp loader activity ; GO:0003689 | inferred from electronic annotation with InterPro:IPR012178, InterPro:IPR013725 DNA binding ; GO:0003677 | inferred from direct assay DNA binding ; GO:0003677 | non-traceable author statement DNA binding ; GO:0003677 | inferred fro…
HMC03748	55610	FBgn0053052	Gorab	Golgin, RAB6 interacting	Insufficient genetic data for FlyBase to solicit a summary. [Date last reviewed: 2016-06-30]	positive regulation of centriole replication ; GO:0046601 | inferred from mutant phenotype positive regulation of cilium assembly ; GO:0045724 | inferred from mutant phenotype positive regulation of cytokinesis ; GO:0032467 | inferred from mutant phenotype	centrosome ; GO:0005813 | inferred from direct assay centriole ; GO:0005814 | inferred from direct assay trans-Golgi network ; GO:0005802 | inferred from direct assay	protein binding ; GO:0005515 | inferred from physical interaction with UniProtKB:Q9VAC8
HMS02706	43993	FBgn0024232	gprs	gprs	Insufficient genetic data for FlyBase to solicit a summary. [Date last reviewed: 2016-06-30]	-	-	molecular_function ; GO:0003674 | no biological data available
HMS02002	40836	FBgn0001142	Gs1	Glutamine synthetase 1	Glutamine synthetase 1 (Gs1) encodes the mitochondrial enzyme that uses glutamate and ammonia as substrates to synthesize glutamine, which is a precursor of purine and pyrimidine synthesis. An adequate level of maternally supplied Gs1 product activity is necessary in the early embryonic development. High level of glutamine in mitochondria causes megamitochondrial formation in cells. [Date last re…	glutamine biosynthetic process ; GO:0006542 | inferred from electronic annotation with InterPro:IPR008147 phagocytosis ; GO:0006909 | inferred from mutant phenotype mitochondrion organization ; GO:0007005 | inferred from mutant phenotype inferred from genetic interaction with SelD glutamine metabolic process ; GO:0006541 | inferred from mutant phenotype inferred from genetic interaction with SelD	mitochondrion ; GO:0005739 | inferred from high throughput direct assay mitochondrion ; GO:0005739 | inferred from direct assay	glutamate-ammonia ligase activity ; GO:0004356 | inferred from direct assay
HMC04876	57559	FBgn0001150	gt	giant	Giant is a transcription factor in the basic leucine zipper family. It is one of the "gap" transcription factors, transcribed very early in embryonic development, that help to divide the embryo along the anteroposterior axis. [Date last reviewed: 2016-06-30]	specification of segmental identity, labial segment ; GO:0007381 | inferred from mutant phenotype negative regulation of transcription by RNA polymerase II ; GO:0000122 | inferred from mutant phenotype regulation of cell size ; GO:0008361 | inferred from mutant phenotype zygotic determination of anterior/posterior axis, embryo ; GO:0007354 | traceable author statement ring gland development ; GO:…	nucleus ; GO:0005634 | inferred from direct assay nucleus ; GO:0005634 | inferred from biological aspect of ancestor with PANTHER:PTN000945219	DNA-binding transcription factor activity, RNA polymerase II-specific ; GO:0000981 | inferred from direct assay DNA-binding transcription factor activity ; GO:0003700 | inferred from direct assay RNA polymerase II distal enhancer sequence-specific DNA binding ; GO:0000980 | inferred from direct assay RNA polymerase II regulatory region sequence-specific DNA binding ; GO:0000977 | inferred from bi…
HMS01210	34730	FBgn0037376	Hat1	Histone acetyltransferase 1	Histone acetyltransferase 1 (Hat1) encodes a B-type histone acetyltransferase that localizes to both the cytoplasm and the nucleus. It is involved in the escort machinery of newly synthesized histones H3 and H4 to chromatin and acetylates H4 at lysines 5 and 12. It also forms a complex with centromeric histone encoded by cid and is involved in cid chromatin assembly. [Date last reviewed: 2018-10-…	chromatin silencing at telomere ; GO:0006348 | inferred from electronic annotation with InterPro:IPR017380 positive regulation of innate immune response ; GO:0045089 | inferred from high throughput mutant phenotype histone H4 acetylation ; GO:0043967 | inferred from biological aspect of ancestor with PANTHER:PTN000248102 CENP-A containing nucleosome assembly ; GO:0034080 | inferred from mutant ph…	nuclear chromatin ; GO:0000790 | inferred from biological aspect of ancestor with PANTHER:PTN000248102	H4 histone acetyltransferase activity ; GO:0010485 | inferred from biological aspect of ancestor with PANTHER:PTN000248102 H4 histone acetyltransferase activity ; GO:0010485 | inferred from direct assay histone binding ; GO:0042393 | inferred from biological aspect of ancestor with PANTHER:PTN000248102
HMC03574	53345	FBgn0001179	hay	haywire	haywire (hay) encodes a ATP-dependent 3'-5' DNA helicase based on the similarity with the human gene XPB, which is a subunit of the DNA repair and basal transcription factor TFIIH. The product of hay contributes to response to UV and homeotic gene expression. [Date last reviewed: 2018-09-13]	transcription by RNA polymerase II ; GO:0006366 | inferred from mutant phenotype nucleotide-excision repair ; GO:0006289 | inferred from sequence or structural similarity with HGNC:3435 regulation of transcription, DNA-templated ; GO:0006355 | inferred from genetic interaction with hfp regulation of growth ; GO:0040008 | inferred from genetic interaction with hfp nucleotide-excision repair, DNA i…	transcription factor TFIIH holo complex ; GO:0005675 | inferred from physical interaction with CycH, Mat1, mrn, Xpd, Cdk7 nucleus ; GO:0005634 | inferred by curator from GO:0000381 transcription factor TFIIH holo complex ; GO:0005675 | inferred from direct assay transcription factor TFIIH holo complex ; GO:0005675 | inferred from sequence or structural similarity with HGNC:3435 inferred from sequ…	ATP binding ; GO:0005524 | inferred from electronic annotation with InterPro:IPR006935 DNA binding ; GO:0003677 | inferred from electronic annotation with InterPro:IPR006935 transcription factor binding ; GO:0008134 | inferred from biological aspect of ancestor with PANTHER:PTN000138598 helicase activity ; GO:0004386 | inferred from sequence or structural similarity with HGNC:3435 3'-5' DNA helic…
HMC03805	55655	FBgn0011224	heph	hephaestus	-	mRNA processing ; GO:0006397 | inferred from electronic annotation with InterPro:IPR006536 spermatid development ; GO:0007286 | inferred from mutant phenotype imaginal disc-derived wing vein morphogenesis ; GO:0008586 | inferred from mutant phenotype imaginal disc-derived wing margin morphogenesis ; GO:0008587 | inferred from mutant phenotype negative regulation of oskar mRNA translation ; GO:000…	nucleus ; GO:0005634 | inferred from electronic annotation with InterPro:IPR006536 cytosol ; GO:0005829 | inferred from high throughput direct assay ribonucleoprotein complex ; GO:1990904 | inferred from direct assay cytoplasm ; GO:0005737 | inferred from direct assay nucleus ; GO:0005634 | inferred from high throughput direct assay	translation repressor activity, mRNA regulatory element binding ; GO:0000900 | inferred from mutant phenotype mRNA binding ; GO:0003729 | inferred from sequence or structural similarity mRNA 3'-UTR binding ; GO:0003730 | inferred from direct assay
HMC04650	57257	FBgn0001185	her	hermaphrodite	-	sex differentiation ; GO:0007548 | traceable author statement sex determination ; GO:0007530 | inferred from mutant phenotype positive regulation of transcription by RNA polymerase II ; GO:0045944 | traceable author statement sex determination, primary response to X:A ratio ; GO:0007541 | traceable author statement female somatic sex determination ; GO:0019101 | non-traceable author statement reg…	-	nucleic acid binding ; GO:0003676 | inferred from electronic annotation with InterPro:IPR013087 DNA binding ; GO:0003677 | traceable author statement
HMJ22521	60352	FBgn0036057	Hez	Hezron	Insufficient genetic data for FlyBase to solicit a summary. [Date last reviewed: 2017-07-13]	RNA metabolic process ; GO:0016070 | inferred from biological aspect of ancestor with PANTHER:PTN000338840	-	molecular_function ; GO:0003674 | no biological data available
HMJ22521	60352	FBgn0036057	Hez	Hezron	Insufficient genetic data for FlyBase to solicit a summary. [Date last reviewed: 2017-07-13]	RNA metabolic process ; GO:0016070 | inferred from biological aspect of ancestor with PANTHER:PTN000338840	-	molecular_function ; GO:0003674 | no biological data available
HMS02387	41988	FBgn0061209	His2B:CG17949	His2B:CG17949	Insufficient genetic data for FlyBase to solicit a summary. [Date last reviewed: 2016-06-30]	chromatin assembly or disassembly ; GO:0006333 | inferred from sequence or structural similarity with SGD_LOCUS:HTB1; SGD:S000002632	nuclear nucleosome ; GO:0000788 | inferred from sequence or structural similarity with SGD_LOCUS:HTB1; SGD:S000002632	protein heterodimerization activity ; GO:0046982 | inferred from electronic annotation with InterPro:IPR009072 DNA binding ; GO:0003677 | inferred from sequence or structural similarity with SGD_LOCUS:HTB1; SGD:S000002632
HMS02387	41988	FBgn0053868	His2B:CG33868	His2B:CG33868	-	chromatin assembly or disassembly ; GO:0006333 | inferred from sequence or structural similarity with SGD_LOCUS:HTB1; SGD:S000002632	nuclear nucleosome ; GO:0000788 | inferred from sequence or structural similarity with SGD_LOCUS:HTB1; SGD:S000002632	protein heterodimerization activity ; GO:0046982 | inferred from electronic annotation with InterPro:IPR009072 DNA binding ; GO:0003677 | inferred from sequence or structural similarity with SGD_LOCUS:HTB1; SGD:S000002632
HMS02387	41988	FBgn0053870	His2B:CG33870	His2B:CG33870	-	chromatin assembly or disassembly ; GO:0006333 | inferred from sequence or structural similarity with SGD_LOCUS:HTB1; SGD:S000002632	nuclear nucleosome ; GO:0000788 | inferred from sequence or structural similarity with SGD_LOCUS:HTB1; SGD:S000002632	protein heterodimerization activity ; GO:0046982 | inferred from electronic annotation with InterPro:IPR009072 DNA binding ; GO:0003677 | inferred from sequence or structural similarity with SGD_LOCUS:HTB1; SGD:S000002632
HMS02387	41988	FBgn0053872	His2B:CG33872	His2B:CG33872	-	chromatin assembly or disassembly ; GO:0006333 | inferred from sequence or structural similarity with SGD_LOCUS:HTB1; SGD:S000002632	nuclear nucleosome ; GO:0000788 | inferred from sequence or structural similarity with SGD_LOCUS:HTB1; SGD:S000002632	protein heterodimerization activity ; GO:0046982 | inferred from electronic annotation with InterPro:IPR009072 DNA binding ; GO:0003677 | inferred from sequence or structural similarity with SGD_LOCUS:HTB1; SGD:S000002632
HMS02387	41988	FBgn0053874	His2B:CG33874	His2B:CG33874	-	chromatin assembly or disassembly ; GO:0006333 | inferred from sequence or structural similarity with SGD_LOCUS:HTB1; SGD:S000002632	nuclear nucleosome ; GO:0000788 | inferred from sequence or structural similarity with SGD_LOCUS:HTB1; SGD:S000002632	protein heterodimerization activity ; GO:0046982 | inferred from electronic annotation with InterPro:IPR009072 DNA binding ; GO:0003677 | inferred from sequence or structural similarity with SGD_LOCUS:HTB1; SGD:S000002632
HMS02387	41988	FBgn0053876	His2B:CG33876	His2B:CG33876	-	chromatin assembly or disassembly ; GO:0006333 | inferred from sequence or structural similarity with SGD_LOCUS:HTB1; SGD:S000002632	nuclear nucleosome ; GO:0000788 | inferred from sequence or structural similarity with SGD_LOCUS:HTB1; SGD:S000002632	protein heterodimerization activity ; GO:0046982 | inferred from electronic annotation with InterPro:IPR009072 DNA binding ; GO:0003677 | inferred from sequence or structural similarity with SGD_LOCUS:HTB1; SGD:S000002632
HMS02387	41988	FBgn0053878	His2B:CG33878	His2B:CG33878	-	chromatin assembly or disassembly ; GO:0006333 | inferred from sequence or structural similarity with SGD_LOCUS:HTB1; SGD:S000002632	nuclear nucleosome ; GO:0000788 | inferred from sequence or structural similarity with SGD_LOCUS:HTB1; SGD:S000002632	protein heterodimerization activity ; GO:0046982 | inferred from electronic annotation with InterPro:IPR009072 DNA binding ; GO:0003677 | inferred from sequence or structural similarity with SGD_LOCUS:HTB1; SGD:S000002632
HMS02387	41988	FBgn0053880	His2B:CG33880	His2B:CG33880	-	chromatin assembly or disassembly ; GO:0006333 | inferred from sequence or structural similarity with SGD_LOCUS:HTB1; SGD:S000002632	nuclear nucleosome ; GO:0000788 | inferred from sequence or structural similarity with SGD_LOCUS:HTB1; SGD:S000002632	protein heterodimerization activity ; GO:0046982 | inferred from electronic annotation with InterPro:IPR009072 DNA binding ; GO:0003677 | inferred from sequence or structural similarity with SGD_LOCUS:HTB1; SGD:S000002632
HMS02387	41988	FBgn0053882	His2B:CG33882	His2B:CG33882	-	chromatin assembly or disassembly ; GO:0006333 | inferred from sequence or structural similarity with SGD_LOCUS:HTB1; SGD:S000002632	nuclear nucleosome ; GO:0000788 | inferred from sequence or structural similarity with SGD_LOCUS:HTB1; SGD:S000002632	protein heterodimerization activity ; GO:0046982 | inferred from electronic annotation with InterPro:IPR009072 DNA binding ; GO:0003677 | inferred from sequence or structural similarity with SGD_LOCUS:HTB1; SGD:S000002632
HMS02387	41988	FBgn0053884	His2B:CG33884	His2B:CG33884	-	chromatin assembly or disassembly ; GO:0006333 | inferred from sequence or structural similarity with SGD_LOCUS:HTB1; SGD:S000002632	nuclear nucleosome ; GO:0000788 | inferred from sequence or structural similarity with SGD_LOCUS:HTB1; SGD:S000002632	protein heterodimerization activity ; GO:0046982 | inferred from electronic annotation with InterPro:IPR009072 DNA binding ; GO:0003677 | inferred from sequence or structural similarity with SGD_LOCUS:HTB1; SGD:S000002632
HMS02387	41988	FBgn0053886	His2B:CG33886	His2B:CG33886	-	chromatin assembly or disassembly ; GO:0006333 | inferred from sequence or structural similarity with SGD_LOCUS:HTB1; SGD:S000002632	nuclear nucleosome ; GO:0000788 | inferred from sequence or structural similarity with SGD_LOCUS:HTB1; SGD:S000002632	protein heterodimerization activity ; GO:0046982 | inferred from electronic annotation with InterPro:IPR009072 DNA binding ; GO:0003677 | inferred from sequence or structural similarity with SGD_LOCUS:HTB1; SGD:S000002632
HMS02387	41988	FBgn0053888	His2B:CG33888	His2B:CG33888	-	chromatin assembly or disassembly ; GO:0006333 | inferred from sequence or structural similarity with SGD_LOCUS:HTB1; SGD:S000002632	nuclear nucleosome ; GO:0000788 | inferred from sequence or structural similarity with SGD_LOCUS:HTB1; SGD:S000002632	protein heterodimerization activity ; GO:0046982 | inferred from electronic annotation with InterPro:IPR009072 DNA binding ; GO:0003677 | inferred from sequence or structural similarity with SGD_LOCUS:HTB1; SGD:S000002632
HMS02387	41988	FBgn0053890	His2B:CG33890	His2B:CG33890	-	chromatin assembly or disassembly ; GO:0006333 | inferred from sequence or structural similarity with SGD_LOCUS:HTB1; SGD:S000002632	nuclear nucleosome ; GO:0000788 | inferred from sequence or structural similarity with SGD_LOCUS:HTB1; SGD:S000002632	protein heterodimerization activity ; GO:0046982 | inferred from electronic annotation with InterPro:IPR009072 DNA binding ; GO:0003677 | inferred from sequence or structural similarity with SGD_LOCUS:HTB1; SGD:S000002632
HMS02387	41988	FBgn0053892	His2B:CG33892	His2B:CG33892	Insufficient genetic data for FlyBase to solicit a summary. [Date last reviewed: 2016-06-30]	chromatin assembly or disassembly ; GO:0006333 | inferred from sequence or structural similarity with SGD_LOCUS:HTB1; SGD:S000002632	nuclear nucleosome ; GO:0000788 | inferred from sequence or structural similarity with SGD_LOCUS:HTB1; SGD:S000002632	protein heterodimerization activity ; GO:0046982 | inferred from electronic annotation with InterPro:IPR009072 DNA binding ; GO:0003677 | inferred from sequence or structural similarity with SGD_LOCUS:HTB1; SGD:S000002632
HMS02387	41988	FBgn0053894	His2B:CG33894	His2B:CG33894	-	chromatin assembly or disassembly ; GO:0006333 | inferred from sequence or structural similarity with SGD_LOCUS:HTB1; SGD:S000002632	nuclear nucleosome ; GO:0000788 | inferred from sequence or structural similarity with SGD_LOCUS:HTB1; SGD:S000002632	protein heterodimerization activity ; GO:0046982 | inferred from electronic annotation with InterPro:IPR009072 DNA binding ; GO:0003677 | inferred from sequence or structural similarity with SGD_LOCUS:HTB1; SGD:S000002632
HMS02387	41988	FBgn0053896	His2B:CG33896	His2B:CG33896	-	chromatin assembly or disassembly ; GO:0006333 | inferred from sequence or structural similarity with SGD_LOCUS:HTB1; SGD:S000002632	nuclear nucleosome ; GO:0000788 | inferred from sequence or structural similarity with SGD_LOCUS:HTB1; SGD:S000002632	protein heterodimerization activity ; GO:0046982 | inferred from electronic annotation with InterPro:IPR009072 DNA binding ; GO:0003677 | inferred from sequence or structural similarity with SGD_LOCUS:HTB1; SGD:S000002632
HMS02387	41988	FBgn0053898	His2B:CG33898	His2B:CG33898	-	chromatin assembly or disassembly ; GO:0006333 | inferred from sequence or structural similarity with SGD_LOCUS:HTB1; SGD:S000002632	nuclear nucleosome ; GO:0000788 | inferred from sequence or structural similarity with SGD_LOCUS:HTB1; SGD:S000002632	protein heterodimerization activity ; GO:0046982 | inferred from electronic annotation with InterPro:IPR009072 DNA binding ; GO:0003677 | inferred from sequence or structural similarity with SGD_LOCUS:HTB1; SGD:S000002632
HMS02387	41988	FBgn0053900	His2B:CG33900	His2B:CG33900	-	chromatin assembly or disassembly ; GO:0006333 | inferred from sequence or structural similarity with SGD_LOCUS:HTB1; SGD:S000002632	nuclear nucleosome ; GO:0000788 | inferred from sequence or structural similarity with SGD_LOCUS:HTB1; SGD:S000002632	protein heterodimerization activity ; GO:0046982 | inferred from electronic annotation with InterPro:IPR009072 DNA binding ; GO:0003677 | inferred from sequence or structural similarity with SGD_LOCUS:HTB1; SGD:S000002632
HMS02387	41988	FBgn0053902	His2B:CG33902	His2B:CG33902	-	chromatin assembly or disassembly ; GO:0006333 | inferred from sequence or structural similarity with SGD_LOCUS:HTB1; SGD:S000002632	nuclear nucleosome ; GO:0000788 | inferred from sequence or structural similarity with SGD_LOCUS:HTB1; SGD:S000002632	protein heterodimerization activity ; GO:0046982 | inferred from electronic annotation with InterPro:IPR009072 DNA binding ; GO:0003677 | inferred from sequence or structural similarity with SGD_LOCUS:HTB1; SGD:S000002632
HMS02387	41988	FBgn0053904	His2B:CG33904	His2B:CG33904	-	chromatin assembly or disassembly ; GO:0006333 | inferred from sequence or structural similarity with SGD_LOCUS:HTB1; SGD:S000002632	nuclear nucleosome ; GO:0000788 | inferred from sequence or structural similarity with SGD_LOCUS:HTB1; SGD:S000002632	protein heterodimerization activity ; GO:0046982 | inferred from electronic annotation with InterPro:IPR009072 DNA binding ; GO:0003677 | inferred from sequence or structural similarity with SGD_LOCUS:HTB1; SGD:S000002632
HMS02387	41988	FBgn0053906	His2B:CG33906	His2B:CG33906	-	chromatin assembly or disassembly ; GO:0006333 | inferred from sequence or structural similarity with SGD_LOCUS:HTB1; SGD:S000002632	nuclear nucleosome ; GO:0000788 | inferred from sequence or structural similarity with SGD_LOCUS:HTB1; SGD:S000002632	protein heterodimerization activity ; GO:0046982 | inferred from electronic annotation with InterPro:IPR009072 DNA binding ; GO:0003677 | inferred from sequence or structural similarity with SGD_LOCUS:HTB1; SGD:S000002632
HMS02387	41988	FBgn0053908	His2B:CG33908	His2B:CG33908	-	chromatin assembly or disassembly ; GO:0006333 | inferred from sequence or structural similarity with SGD_LOCUS:HTB1; SGD:S000002632	nuclear nucleosome ; GO:0000788 | inferred from sequence or structural similarity with SGD_LOCUS:HTB1; SGD:S000002632	protein heterodimerization activity ; GO:0046982 | inferred from electronic annotation with InterPro:IPR009072 DNA binding ; GO:0003677 | inferred from sequence or structural similarity with SGD_LOCUS:HTB1; SGD:S000002632
HMS02387	41988	FBgn0053910	His2B:CG33910	His2B:CG33910	Insufficient genetic data for FlyBase to solicit a summary. [Date last reviewed: 2016-06-30]	chromatin assembly or disassembly ; GO:0006333 | inferred from sequence or structural similarity with SGD_LOCUS:HTB1; SGD:S000002632	nuclear nucleosome ; GO:0000788 | inferred from sequence or structural similarity with SGD_LOCUS:HTB1; SGD:S000002632	protein heterodimerization activity ; GO:0046982 | inferred from electronic annotation with InterPro:IPR009072 DNA binding ; GO:0003677 | inferred from sequence or structural similarity with SGD_LOCUS:HTB1; SGD:S000002632
HMC03232	51485	FBgn0027087	HisRS	Histidyl-tRNA synthetase	Insufficient genetic data for FlyBase to solicit a summary. [Date last reviewed: 2016-06-30]	histidyl-tRNA aminoacylation ; GO:0006427 | inferred from biological aspect of ancestor with PANTHER:PTN000159003 mitochondrial translation ; GO:0032543 | inferred from biological aspect of ancestor with PANTHER:PTN000159004 histidyl-tRNA aminoacylation ; GO:0006427 | traceable author statement	cytoplasm ; GO:0005737 | inferred from biological aspect of ancestor with PANTHER:PTN000159003 mitochondrion ; GO:0005739 | inferred from biological aspect of ancestor with PANTHER:PTN000159004 cytosol ; GO:0005829 | inferred from high throughput direct assay cytosol ; GO:0005829 | inferred from biological aspect of ancestor with PANTHER:PTN000159003 mitochondrion ; GO:0005739 | traceable author …	ATP binding ; GO:0005524 | inferred from electronic annotation with InterPro:IPR000738, InterPro:IPR015807 histidine-tRNA ligase activity ; GO:0004821 | inferred from biological aspect of ancestor with PANTHER:PTN000159003 histidine-tRNA ligase activity ; GO:0004821 | traceable author statement
HMC03232	51485	FBgn0027087	HisRS	Histidyl-tRNA synthetase	Insufficient genetic data for FlyBase to solicit a summary. [Date last reviewed: 2016-06-30]	histidyl-tRNA aminoacylation ; GO:0006427 | inferred from biological aspect of ancestor with PANTHER:PTN000159003 mitochondrial translation ; GO:0032543 | inferred from biological aspect of ancestor with PANTHER:PTN000159004 histidyl-tRNA aminoacylation ; GO:0006427 | traceable author statement	cytoplasm ; GO:0005737 | inferred from biological aspect of ancestor with PANTHER:PTN000159003 mitochondrion ; GO:0005739 | inferred from biological aspect of ancestor with PANTHER:PTN000159004 cytosol ; GO:0005829 | inferred from high throughput direct assay cytosol ; GO:0005829 | inferred from biological aspect of ancestor with PANTHER:PTN000159003 mitochondrion ; GO:0005739 | traceable author …	ATP binding ; GO:0005524 | inferred from electronic annotation with InterPro:IPR000738, InterPro:IPR015807 histidine-tRNA ligase activity ; GO:0004821 | inferred from biological aspect of ancestor with PANTHER:PTN000159003 histidine-tRNA ligase activity ; GO:0004821 | traceable author statement
HMC03053	50652	FBgn0263782	Hmgcr	HMG Coenzyme A reductase	-	oxidation-reduction process ; GO:0055114 | inferred from electronic annotation with InterPro:IPR002202, InterPro:IPR004554, InterPro:IPR004816, InterPro:IPR009029, InterPro:IPR023074, InterPro:IPR023076, InterPro:IPR023282 coenzyme A metabolic process ; GO:0015936 | inferred from electronic annotation with InterPro:IPR002202, InterPro:IPR009029 embryonic heart tube development ; GO:0035050 | infe…	integral component of membrane ; GO:0016021 | inferred from electronic annotation with InterPro:IPR000731, InterPro:IPR004554 endoplasmic reticulum membrane ; GO:0005789 | inferred from biological aspect of ancestor with PANTHER:PTN000060347 peroxisomal membrane ; GO:0005778 | inferred from biological aspect of ancestor with PANTHER:PTN000060347 peroxisomal membrane ; GO:0005778 | inferred from s…	NADP binding ; GO:0050661 | inferred from electronic annotation with InterPro:IPR004554, InterPro:IPR004816 hydroxymethylglutaryl-CoA reductase (NADPH) activity ; GO:0004420 | inferred from biological aspect of ancestor with PANTHER:PTN000060346 hydroxymethylglutaryl-CoA reductase activity ; GO:0042282 | inferred from biological aspect of ancestor with PANTHER:PTN000060346
HMC03500	53284	FBgn0038376	Hmt-1	Heavy metal tolerance factor 1	-	cadmium ion transmembrane transport ; GO:0070574 | NOT inferred from genetic interaction with PomBase:SPCC737.09c heme transport ; GO:0015886 | inferred from sequence or structural similarity with UniProtKB:Q9NP58 response to cadmium ion ; GO:0046686 | inferred from genetic interaction with PomBase:SPCC737.09c	vacuolar membrane ; GO:0005774 | inferred from biological aspect of ancestor with PANTHER:PTN002795047 integral component of membrane ; GO:0016021 | inferred from biological aspect of ancestor with PANTHER:PTN002517083 vacuolar membrane ; GO:0005774 | inferred from direct assay mitochondrial inner membrane ; GO:0005743 | inferred from sequence or structural similarity with UniProtKB:Q9NP58	ATP binding ; GO:0005524 | inferred from electronic annotation with InterPro:IPR003439, InterPro:IPR011527, InterPro:IPR017871 ATPase activity, coupled to transmembrane movement of substances ; GO:0042626 | inferred from sequence or structural similarity with UniProtKB:Q9NP58 heme transporter activity ; GO:0015232 | inferred from sequence or structural similarity with UniProtKB:Q9NP58 ATPase acti…
HMJ22710	60419	FBgn0264005	Hmx	H6-like-homeobox	-	negative regulation of transcription, DNA-templated ; GO:0045892 | inferred from sequence or structural similarity with UniProtKB:Q9NP08	-	sequence-specific DNA binding ; GO:0043565 | inferred from electronic annotation with InterPro:IPR017970 DNA binding ; GO:0003677 | inferred from sequence or structural similarity with UniProtKB:Q9NP08
HMC03820	55665	FBgn0264491	how	held out wings	Held out wings (How) is an RNA-binding protein which is highly expressed in the mesoderm and tendon cells. The gene is spliced into two isoforms: How(L) and How(S). How(L) induces RNA destabilization, whereas How(S) stabilizes the RNA targets. [Date last reviewed: 2016-08-25]	regulation of translation ; GO:0006417 | inferred from electronic annotation with InterPro:IPR031119 regulation of embryonic development ; GO:0045995 | inferred from mutant phenotype oenocyte development ; GO:0007438 | inferred from mutant phenotype cell differentiation ; GO:0030154 | traceable author statement germ-line stem cell population maintenance ; GO:0030718 | inferred from mutant phenoty…	cytoplasm ; GO:0005737 | inferred from direct assay nucleus ; GO:0005634 | inferred from direct assay nucleus ; GO:0005634 | inferred by curator from GO:0000381	single-stranded RNA binding ; GO:0003727 | inferred from electronic annotation with InterPro:IPR031119 mRNA binding ; GO:0003729 | inferred from direct assay mRNA 3'-UTR binding ; GO:0003730 | inferred from direct assay
HMJ21497	54803	FBgn0264562	Hr4	Hormone receptor 4	Hormone receptor 4 (Hr4) is a nuclear receptor that acts both upstream and downstream of the steroid hormone ecdysone. In the prothoracic gland Hr4 acts as a repressor of ecdysone production. In other tissues, including the salivary gland and the fat body, Hr4 is transcriptionally induced by ecdysone to transduce the effects of the hormone. [Date last reviewed: 2017-03-02]	cellular response to hypoxia ; GO:0071456 | inferred from mutant phenotype regulation of developmental growth ; GO:0048638 | inferred from mutant phenotype positive regulation of multicellular organism growth ; GO:0040018 | inferred from mutant phenotype negative regulation of transcription, DNA-templated ; GO:0045892 | inferred from mutant phenotype regulation of pupariation ; GO:0106023 | infer…	transcription factor complex ; GO:0005667 | inferred from biological aspect of ancestor with PANTHER:PTN000637657 cytoplasm ; GO:0005737 | inferred from direct assay nucleus ; GO:0005634 | inferred from biological aspect of ancestor with PANTHER:PTN000637657 nucleus ; GO:0005634 | inferred from direct assay	steroid hormone receptor activity ; GO:0003707 | inferred from electronic annotation with InterPro:IPR001723 zinc ion binding ; GO:0008270 | inferred from electronic annotation with InterPro:IPR001628, InterPro:IPR013088 nuclear receptor activity ; GO:0004879 | inferred from mutant phenotype nuclear receptor activity ; GO:0004879 | inferred from biological aspect of ancestor with PANTHER:PTN00063…
HMS02445	42610	FBgn0001225	Hsp26	Heat shock protein 26	-	chaperone-mediated protein folding ; GO:0061077 | inferred from direct assay protein refolding ; GO:0042026 | inferred from direct assay cold acclimation ; GO:0009631 | inferred from expression pattern determination of adult lifespan ; GO:0008340 | inferred from mutant phenotype chaperone-mediated protein folding ; GO:0061077 | inferred from sequence model response to heat ; GO:0009408 | inferred…	cytoplasm ; GO:0005737 | inferred from high throughput direct assay	unfolded protein binding ; GO:0051082 | inferred from sequence model myosin binding ; GO:0017022 | inferred from physical interaction with Myo10A unfolded protein binding ; GO:0051082 | inferred from direct assay
HMJ21725	53007	FBgn0001227	Hsp67Ba	Heat shock gene 67Ba	Insufficient genetic data for FlyBase to solicit a summary. [Date last reviewed: 2016-06-30]	chaperone-mediated protein folding ; GO:0061077 | inferred from sequence model response to heat ; GO:0009408 | inferred from direct assay	cellular_component ; GO:0005575 | no biological data available	unfolded protein binding ; GO:0051082 | inferred from sequence model
HMJ22375	58289	FBgn0010389	htl	heartless	Heartless (Htl) is a transmembrane tyrosine kinase receptor for secreted FGF ligands that utilizes the intracellular Ras-MAP kinase pathway. Htl contributes to embryonic mesoderm migration and the specification of several mature mesodermal cell derivatives. [Date last reviewed: 2017-03-02]	regulation of cell shape ; GO:0008360 | inferred from mutant phenotype mesodermal cell fate determination ; GO:0007500 | inferred from expression pattern mesodermal cell migration ; GO:0008078 | inferred from mutant phenotype glial cell migration ; GO:0008347 | inferred from mutant phenotype germ cell migration ; GO:0008354 | inferred from mutant phenotype heart development ; GO:0007507 | traceab…	integral component of plasma membrane ; GO:0005887 | inferred from biological aspect of ancestor with PANTHER:PTN002356460 receptor complex ; GO:0043235 | inferred from biological aspect of ancestor with PANTHER:PTN002356460	fibroblast growth factor-activated receptor activity ; GO:0005007 | inferred from electronic annotation with InterPro:IPR016248 ATP binding ; GO:0005524 | inferred from electronic annotation with InterPro:IPR000719, InterPro:IPR016248, InterPro:IPR017441 fibroblast growth factor-activated receptor activity ; GO:0005007 | traceable author statement protein tyrosine kinase activity ; GO:0004713 | n…
HMC03494	53278	FBgn0037657	hyx	hyrax	Hyrax is recruited by signaling pathway specific transcriptional regulators such as arm and ci and is important for the output of Wingless and Hedgehog pathways, respectively. [Date last reviewed: 2016-12-15]	histone modification ; GO:0016570 | inferred from electronic annotation with InterPro:IPR007852 recruitment of 3'-end processing factors to RNA polymerase II holoenzyme complex ; GO:0034402 | inferred from biological aspect of ancestor with PANTHER:PTN000279609 positive regulation of smoothened signaling pathway ; GO:0045880 | inferred from mutant phenotype inferred from genetic interaction with …	nucleus ; GO:0005634 | inferred from direct assay transcription factor complex ; GO:0005667 | inferred from physical interaction with ci Cdc73/Paf1 complex ; GO:0016593 | inferred from direct assay Cdc73/Paf1 complex ; GO:0016593 | inferred from biological aspect of ancestor with PANTHER:PTN000279609	RNA polymerase II complex binding ; GO:0000993 | inferred from biological aspect of ancestor with PANTHER:PTN000279609 transcription factor binding ; GO:0008134 | inferred from physical interaction with ci
HMC04127	56905	FBgn0013763	Idgf6	Imaginal disc growth factor 6	Imaginal disc growth factor 6 (Idgf6) is one of six genes in the IDGF family, which evolved from chitinases that lost their enzymatic activity. Idgf6 encodes a secreted protein that is highly expressed in larval fat body and adult head. Idgf6 product is involved in molting and egg chamber tube morphogenesis. [Date last reviewed: 2018-09-13]	carbohydrate metabolic process ; GO:0005975 | inferred from electronic annotation with InterPro:IPR001223, InterPro:IPR013781 ecdysis, chitin-based cuticle ; GO:0018990 | inferred from mutant phenotype chitin-based cuticle development ; GO:0040003 | inferred from mutant phenotype wound healing ; GO:0042060 | inferred from mutant phenotype imaginal disc development ; GO:0007444 | inferred from seq…	extracellular region ; GO:0005576 | inferred from high throughput direct assay extracellular space ; GO:0005615 | inferred from direct assay extracellular region ; GO:0005576 | inferred from biological aspect of ancestor with PANTHER:PTN000126545	chitinase activity ; GO:0004568 | NOT inferred from direct assay chitin binding ; GO:0008061 | inferred from biological aspect of ancestor with PANTHER:PTN000126545 chitin binding ; GO:0008061 | inferred from direct assay chitinase activity ; GO:0004568 | non-traceable author statement imaginal disc growth factor receptor binding ; GO:0008084 | inferred from sequence or structural similarity with…
HMS02431	42599	FBgn0034329	IM1	Immune induced molecule 1	Immune induced molecule 1 belongs to a class of small secreted peptides released in the hemolymph upon Toll pathway activation during microbial infection. [Date last reviewed: 2016-06-30]	defense response ; GO:0006952 | inferred from direct assay response to bacterium ; GO:0009617 | inferred from high throughput expression pattern	extracellular region ; GO:0005576 | inferred from direct assay	-
HMJ24160	62920	FBgn0025776	ind	intermediate neuroblasts defective	-	pattern specification process ; GO:0007389 | non-traceable author statement neuroblast fate determination ; GO:0007400 | traceable author statement regulation of transcription by RNA polymerase II ; GO:0006357 | inferred from mutant phenotype brain development ; GO:0007420 | traceable author statement negative regulation of transcription by RNA polymerase II ; GO:0000122 | inferred from direct as…	nucleus ; GO:0005634 | inferred from direct assay	DNA-binding transcription factor activity ; GO:0003700 | inferred from direct assay transcription factor binding ; GO:0008134 | inferred from physical interaction with D sequence-specific DNA binding ; GO:0043565 | inferred from direct assay
HMS01011	34037	FBgn0036273	INPP5E	Inositol polyphosphate 5-phosphatase E	-	protein localization to cilium ; GO:0061512 | inferred from mutant phenotype phosphatidylinositol dephosphorylation ; GO:0046856 | inferred from sequence or structural similarity with SGD:S000001264 dephosphorylation ; GO:0016311 | non-traceable author statement sensory perception of sound ; GO:0007605 | inferred from mutant phenotype	ciliary base ; GO:0097546 | inferred from direct assay membrane ; GO:0016020 | inferred from sequence or structural similarity with SGD:S000001264 cytoplasm ; GO:0005737 | inferred from sequence or structural similarity with SGD:S000001264	phosphatidylinositol-4,5-bisphosphate 5-phosphatase activity ; GO:0004439 | inferred from sequence or structural similarity with SGD:S000001264 inositol trisphosphate phosphatase activity ; GO:0046030 | non-traceable author statement
HMC03644	52904	FBgn0261383	IntS6	Integrator 6	-	snRNA 3'-end processing ; GO:0034472 | inferred from biological aspect of ancestor with PANTHER:PTN000310952 snRNA 3'-end processing ; GO:0034472 | inferred from direct assay snRNA processing ; GO:0016180 | inferred from sequence or structural similarity with HGNC:14879	nucleus ; GO:0005634 | inferred from sequence or structural similarity with UniProtKB:Q9UL03 integrator complex ; GO:0032039 | inferred from sequence or structural similarity with HGNC:14879 integrator complex ; GO:0032039 | inferred from biological aspect of ancestor with PANTHER:PTN000310952	molecular_function ; GO:0003674 | no biological data available
HMJ23453	61898	FBgn0030385	Ir11a	Ionotropic receptor 11a	Insufficient genetic data for FlyBase to solicit a summary. [Date last reviewed: 2016-06-30]	sensory perception of taste ; GO:0050909 | inferred from expression pattern detection of chemical stimulus ; GO:0009593 | inferred from sequence or structural similarity with Ir92a	integral component of membrane ; GO:0016021 | inferred from sequence model	ligand-gated ion channel activity ; GO:0015276 | inferred from sequence model
HMJ21583	54846	FBgn0036937	Ir76b	Ionotropic receptor 76b	Ionotropic receptor 76b is a member of the Ionotropic Receptor (IR) family of variant ionotropic glutamate receptors. It functions in chemosensory detection of various amines and salt, as a probable co-receptor subunit. [Date last reviewed: 2016-06-30]	cellular response to amino acid stimulus ; GO:0071230 | inferred from mutant phenotype transmission of nerve impulse ; GO:0019226 | inferred from mutant phenotype cellular response to salt ; GO:1902075 | inferred from mutant phenotype detection of chemical stimulus involved in sensory perception of smell ; GO:0050911 | inferred from direct assay detection of chemical stimulus ; GO:0009593 | infer…	sensory dendrite ; GO:0071683 | inferred from direct assay AMPA glutamate receptor complex ; GO:0032281 | inferred from biological aspect of ancestor with PANTHER:PTN000438080 receptor complex ; GO:0043235 | inferred from direct assay plasma membrane ; GO:0005886 | inferred from biological aspect of ancestor with PANTHER:PTN000437926 integral component of membrane ; GO:0016021 | inferred from seq…	sodium channel activity ; GO:0005272 | inferred from direct assay AMPA glutamate receptor activity ; GO:0004971 | inferred from biological aspect of ancestor with PANTHER:PTN000438080 salty taste receptor activity ; GO:0033039 | inferred from mutant phenotype olfactory receptor activity ; GO:0004984 | contributes_to inferred from direct assay ligand-gated ion channel activity ; GO:0015276 | infer…
HMJ21363	53975	FBgn0039080	Ir94h	Ionotropic receptor 94h	Insufficient genetic data for FlyBase to solicit a summary. [Date last reviewed: 2016-06-30]	detection of chemical stimulus ; GO:0009593 | inferred from sequence or structural similarity with Ir92a	integral component of membrane ; GO:0016021 | inferred from sequence model	ligand-gated ion channel activity ; GO:0015276 | inferred from sequence model
HMS02655	43284	FBgn0033958	jef	jet fuel	Insufficient genetic data for FlyBase to solicit a summary. [Date last reviewed: 2016-06-30]	-	-	-
HMC03780	55633	FBgn0086655	jing	jing	-	axon guidance ; GO:0007411 | inferred from mutant phenotype ventral midline development ; GO:0007418 | inferred from mutant phenotype open tracheal system development ; GO:0007424 | inferred from mutant phenotype imaginal disc-derived wing vein specification ; GO:0007474 | inferred from mutant phenotype tissue regeneration ; GO:0042246 | inferred from mutant phenotype glial cell migration ; GO:00…	ESC/E(Z) complex ; GO:0035098 | inferred from direct assay nucleus ; GO:0005634 | inferred from sequence or structural similarity with ci inferred from sequence or structural similarity with MGI:MGI:1338038 inferred from direct assay	nucleic acid binding ; GO:0003676 | inferred from electronic annotation with InterPro:IPR013087
HMC04030	55343	FBgn0035666	Jon65Aii	Jonah 65Aii	Insufficient genetic data for FlyBase to solicit a summary. [Date last reviewed: 2016-06-30]	proteolysis ; GO:0006508 | inferred from electronic annotation with InterPro:IPR001254, InterPro:IPR001314, InterPro:IPR018114 proteolysis ; GO:0006508 | inferred from sequence model	-	serine-type endopeptidase activity ; GO:0004252 | inferred from electronic annotation with InterPro:IPR001254, InterPro:IPR001314, InterPro:IPR018114 serine-type endopeptidase activity ; GO:0004252 | inferred from sequence model
HMS01631	36740	FBgn0261955	kdn	knockdown	-	carbohydrate metabolic process ; GO:0005975 | inferred from biological aspect of ancestor with PANTHER:PTN000201223 tricarboxylic acid cycle ; GO:0006099 | inferred from biological aspect of ancestor with PANTHER:PTN000201223 carbohydrate metabolic process ; GO:0005975 | inferred from sequence or structural similarity with UniProtKB:O75390	mitochondrion ; GO:0005739 | inferred from high throughput direct assay mitochondrial matrix ; GO:0005759 | inferred from biological aspect of ancestor with PANTHER:PTN000201222 mitochondrial matrix ; GO:0005759 | inferred from sequence or structural similarity with UniProtKB:O75390	citrate (Si)-synthase activity ; GO:0004108 | inferred from sequence or structural similarity with UniProtKB:O75390 citrate (Si)-synthase activity ; GO:0004108 | inferred from biological aspect of ancestor with PANTHER:PTN000201223 citrate (Si)-synthase activity ; GO:0004108 | inferred from direct assay
HMS02180	40932	FBgn0038475	Keap1	Keap1	Keap1 (Keap1) encodes a protein that interacts with the product of cnc to regulate the activation of genes by oxidative stress. [Date last reviewed: 2018-03-08]	protein autoubiquitination ; GO:0051865 | inferred from direct assay response to oxidative stress ; GO:0006979 | inferred from mutant phenotype	polytene chromosome puff ; GO:0005703 | inferred from direct assay nucleus ; GO:0005634 | inferred from direct assay	protein homodimerization activity ; GO:0042803 | inferred from direct assay actin binding ; GO:0003779 | inferred from sequence or structural similarity
HMC03906	55692	FBgn0024887	kin17	kin17	Insufficient genetic data for FlyBase to solicit a summary. [Date last reviewed: 2016-06-30]	DNA replication ; GO:0006260 | inferred from biological aspect of ancestor with PANTHER:PTN000301499 cellular response to DNA damage stimulus ; GO:0006974 | inferred from biological aspect of ancestor with PANTHER:PTN000301499 mRNA splicing, via spliceosome ; GO:0000398 | inferred by curator from GO:0071011	nucleus ; GO:0005634 | inferred from biological aspect of ancestor with PANTHER:PTN000301499 precatalytic spliceosome ; GO:0071011 | inferred from high throughput direct assay	double-stranded DNA binding ; GO:0003690 | inferred from biological aspect of ancestor with PANTHER:PTN000301499
HMS02429	42597	FBgn0010235	Klc	Kinesin light chain	Kinesin light chain (Klc) encodes a component of the kinesin motor protein complex, which moves along microtubules to transport cytoplasmic "cargoes" such as mRNAs, protein complexes, and organelles. [Date last reviewed: 2018-03-08]	microtubule-based movement ; GO:0007018 | inferred from sequence or structural similarity microtubule-based movement ; GO:0007018 | inferred from direct assay dorsal appendage formation ; GO:0046843 | inferred from mutant phenotype	kinesin complex ; GO:0005871 | inferred from electronic annotation with InterPro:IPR002151 kinesin complex ; GO:0005871 | inferred from sequence or structural similarity	protein binding ; GO:0005515 | inferred from physical interaction with UniProtKB:Q9W0K0 microtubule motor activity ; GO:0003777 | inferred from direct assay protein binding ; GO:0005515 | inferred from physical interaction with UniProtKB:Q9GQF1 microtubule motor activity ; GO:0003777 | inferred from sequence or structural similarity
HMS02172	40924	FBgn0265003	koi	klaroid	-	double-strand break repair via homologous recombination ; GO:0000724 | inferred from mutant phenotype nuclear envelope organization ; GO:0006998 | inferred from biological aspect of ancestor with PANTHER:PTN000308195 nucleus localization ; GO:0051647 | inferred from mutant phenotype nuclear migration ; GO:0007097 | inferred from mutant phenotype	nuclear envelope ; GO:0005635 | inferred from biological aspect of ancestor with PANTHER:PTN000308195 nuclear periphery ; GO:0034399 | inferred from direct assay perinuclear region of cytoplasm ; GO:0048471 | inferred from direct assay nuclear envelope ; GO:0005635 | inferred from direct assay	protein membrane anchor ; GO:0043495 | inferred from biological aspect of ancestor with PANTHER:PTN000308195
HMS02136	40888	FBgn0261574	kug	kugelei	Kugelei (also known as Fat2 or Fat-like) is a member of the cadherin superfamily of transmembrane proteins, which mediate cell-cell adhesion and/or cell-cell communication. It is related to ft and its roles include control of planar cell polarity, collective cell migration and morphogenesis. [Date last reviewed: 2016-06-30]	homophilic cell adhesion via plasma membrane adhesion molecules ; GO:0007156 | inferred from electronic annotation with InterPro:IPR002126 hindgut morphogenesis ; GO:0007442 | inferred from mutant phenotype cell-cell adhesion mediated by cadherin ; GO:0044331 | inferred from sequence model defense response to Gram-negative bacterium ; GO:0050829 | inferred from high throughput mutant phenotype es…	cell trailing edge ; GO:0031254 | inferred from direct assay actin-based cell projection ; GO:0098858 | inferred from direct assay integral component of plasma membrane ; GO:0005887 | inferred from sequence or structural similarity basal plasma membrane ; GO:0009925 | inferred from direct assay focal adhesion ; GO:0005925 | inferred from direct assay plasma membrane ; GO:0005886 | inferred from d…	calcium ion binding ; GO:0005509 | inferred from electronic annotation with InterPro:IPR001881, InterPro:IPR002126, InterPro:IPR015919, InterPro:IPR018097 protein-containing complex binding ; GO:0044877 | inferred from physical interaction with Abi cell adhesion molecule binding ; GO:0050839 | inferred from physical interaction with UniProtKB:A0A0B4K774 calcium ion binding ; GO:0005509 | inferred…
HMC04530	57153	FBgn0026713	l(1)G0007	lethal (1) G0007	-	regulation of alternative mRNA splicing, via spliceosome ; GO:0000381 | inferred from mutant phenotype mRNA splicing, via spliceosome ; GO:0000398 | inferred from biological aspect of ancestor with PANTHER:PTN000433947 mRNA splicing, via spliceosome ; GO:0000398 | inferred from sequence or structural similarity with SGD:S000001794	spliceosomal complex ; GO:0005681 | inferred from sequence or structural similarity with SGD:S000001794	ATP binding ; GO:0005524 | inferred from electronic annotation with InterPro:IPR002464, InterPro:IPR011545 RNA binding ; GO:0003723 | inferred from biological aspect of ancestor with PANTHER:PTN000433338 ATP-dependent RNA helicase activity ; GO:0004004 | inferred from sequence or structural similarity with SGD:S000001794 ATP-dependent 3'-5' RNA helicase activity ; GO:0034459 | inferred from biolo…
HMJ23881	62427	FBgn0026702	l(1)G0045	lethal (1) G0045	-	rRNA processing ; GO:0006364 | inferred from sequence or structural similarity with UniProtKB:F4IL30 tRNA 5'-leader removal ; GO:0001682 | inferred from sequence or structural similarity with UniProtKB:Q99575 tRNA processing ; GO:0008033 | inferred from biological aspect of ancestor with PANTHER:PTN000506667	ribonuclease MRP complex ; GO:0000172 | inferred from sequence or structural similarity with UniProtKB:Q99575 multimeric ribonuclease P complex ; GO:0030681 | inferred from sequence or structural similarity with UniProtKB:Q99575 ribonuclease MRP complex ; GO:0000172 | inferred from biological aspect of ancestor with PANTHER:PTN000506667 nucleolar ribonuclease P complex ; GO:0005655 | inferred fro…	ribonuclease P activity ; GO:0004526 | contributes_to inferred from sequence or structural similarity with UniProtKB:Q99575 ribonuclease P activity ; GO:0004526 | inferred from biological aspect of ancestor with PANTHER:PTN000506667 ribonuclease MRP activity ; GO:0000171 | inferred from biological aspect of ancestor with PANTHER:PTN000506667
HMC04370	56931	FBgn0086444	l(2)37Cb	lethal (2) 37Cb	-	mRNA splicing, via spliceosome ; GO:0000398 | inferred from sequence or structural similarity with SGD:S000005294 mRNA splicing, via spliceosome ; GO:0000398 | inferred by curator from GO:0071011,GO:0071013	spliceosomal complex ; GO:0005681 | inferred from biological aspect of ancestor with PANTHER:PTN000434013 catalytic step 2 spliceosome ; GO:0071013 | inferred from high throughput direct assay precatalytic spliceosome ; GO:0071011 | inferred from high throughput direct assay spliceosomal complex ; GO:0005681 | inferred from sequence or structural similarity with SGD:S000005294	ATP-dependent RNA helicase activity ; GO:0004004 | inferred from sequence or structural similarity with SGD:S000000815 ATP-dependent 3'-5' RNA helicase activity ; GO:0034459 | inferred from biological aspect of ancestor with PANTHER:PTN001449167 RNA binding ; GO:0003723 | inferred from biological aspect of ancestor with PANTHER:PTN000433338
HMS01905	38989	FBgn0002121	l(2)gl	lethal (2) giant larvae	Lethal (2) giant larvae (L(2)gl) is a tumor suppressor protein that regulates cell polarity and asymmetric cell division. L(2)gl acts on the basolateral side of epithelial cells, antagonizing the activity of apical complex proteins baz, par-6 and aPKC. [Date last reviewed: 2016-12-01]	basal protein localization ; GO:0045175 | inferred from genetic interaction with jar apical protein localization ; GO:0045176 | inferred from mutant phenotype morphogenesis of an epithelium ; GO:0002009 | traceable author statement establishment of protein localization ; GO:0045184 | inferred from mutant phenotype septate junction assembly ; GO:0019991 | traceable author statement establishment o…	cell cortex ; GO:0005938 | inferred from direct assay cytoplasm ; GO:0005737 | inferred from biological aspect of ancestor with PANTHER:PTN000028271 extracellular matrix ; GO:0031012 | inferred from direct assay septate junction ; GO:0005918 | non-traceable author statement smooth septate junction ; GO:0005920 | inferred from direct assay cytoskeleton ; GO:0005856 | non-traceable author statement…	protein kinase inhibitor activity ; GO:0004860 | inferred from direct assay myosin II binding ; GO:0045159 | traceable author statement myosin II binding ; GO:0045159 | inferred from genetic interaction with zip Rab GTPase binding ; GO:0017137 | inferred from biological aspect of ancestor with PANTHER:PTN000028271 myosin binding ; GO:0017022 | inferred from genetic interaction with zip SNARE bind…
HMS02563	42870	FBgn0260655	l(3)76BDm	lethal (3) 76BDm	-	autophagosome assembly ; GO:0000045 | inferred from biological aspect of ancestor with PANTHER:PTN000312051 protein localization by the Cvt pathway ; GO:0032258 | inferred from biological aspect of ancestor with PANTHER:PTN000312051 endoplasmic reticulum to Golgi vesicle-mediated transport ; GO:0006888 | inferred from sequence or structural similarity with SGD:S000002515 autophagy of peroxisome ;…	cytoplasmic vesicle ; GO:0031410 | inferred from biological aspect of ancestor with PANTHER:PTN000312051 TRAPPIII protein complex ; GO:1990072 | inferred from biological aspect of ancestor with PANTHER:PTN000312051 phagophore assembly site ; GO:0000407 | inferred from biological aspect of ancestor with PANTHER:PTN000312051 TRAPP complex ; GO:0030008 | inferred from sequence or structural similari…	molecular_function ; GO:0003674 | no biological data available
HMS01698	38254	FBgn0032949	Lamp1	Lamp1	-	-	membrane ; GO:0016020 | inferred from electronic annotation with InterPro:IPR002000 lysosome ; GO:0005764 | inferred from direct assay	-
HMJ21839	57830	FBgn0020642	Lcp65Ac	Lcp65Ac	Insufficient genetic data for FlyBase to solicit a summary. [Date last reviewed: 2016-06-30]	chitin-based cuticle development ; GO:0040003 | inferred from sequence model	extracellular matrix ; GO:0031012 | inferred from sequence model	structural constituent of cuticle ; GO:0042302 | inferred from electronic annotation with InterPro:IPR000618 structural constituent of chitin-based larval cuticle ; GO:0008010 | inferred from sequence or structural similarity structural constituent of chitin-based larval cuticle ; GO:0008010 | inferred from sequence model
HMS05002	60010	FBgn0261524	lic	licorne	-	activation of MAPK activity ; GO:0000187 | inferred from direct assay stress-activated protein kinase signaling cascade ; GO:0031098 | inferred from biological aspect of ancestor with PANTHER:PTN000684825 p38MAPK cascade ; GO:0038066 | inferred from mutant phenotype positive regulation of cell size ; GO:0045793 | inferred from mutant phenotype inferred from genetic interaction with gig MAPK casca…	cytoplasm ; GO:0005737 | inferred from sequence or structural similarity with SGD:S000003664 cytoplasm ; GO:0005737 | inferred from biological aspect of ancestor with PANTHER:PTN000684825	ATP binding ; GO:0005524 | inferred from electronic annotation with InterPro:IPR000719 mitogen-activated protein kinase kinase kinase binding ; GO:0031435 | inferred from physical interaction with Mekk1 protein kinase activity ; GO:0004672 | inferred from direct assay MAP kinase kinase activity ; GO:0004708 | traceable author statement MAP kinase kinase activity ; GO:0004708 | inferred from direc…
HMC04867	57550	FBgn0020556	lncRNA:bxd	bithoraxoid	-	negative regulation of transcription, DNA-templated ; GO:0045892 | inferred from expression pattern	nucleus ; GO:0005634 | inferred from direct assay	-
HMJ21111	50998	FBgn0033309	Lnpk	Lunapark	Insufficient genetic data for FlyBase to solicit a summary. [Date last reviewed: 2016-06-30]	endoplasmic reticulum tubular network organization ; GO:0071786 | inferred from biological aspect of ancestor with PANTHER:PTN000499233	endomembrane system ; GO:0012505 | inferred from high throughput direct assay endoplasmic reticulum tubular network ; GO:0071782 | inferred from biological aspect of ancestor with PANTHER:PTN000499233	-
HMJ22079	58130	FBgn0028582	lqf	liquid facets	-	synaptic vesicle endocytosis ; GO:0048488 | non-traceable author statement endocytosis ; GO:0006897 | non-traceable author statement macroautophagy ; GO:0016236 | inferred from mutant phenotype positive regulation of Notch signaling pathway ; GO:0045747 | inferred from mutant phenotype receptor-mediated endocytosis ; GO:0006898 | inferred from mutant phenotype neurotransmitter secretion ; GO:0007…	lysosome ; GO:0005764 | inferred from direct assay nuclear periphery ; GO:0034399 | inferred from direct assay autophagosome ; GO:0005776 | inferred from direct assay	-
HMS02334	41937	FBgn0037621	M1BP	Motif 1 Binding Protein	Insufficient genetic data for FlyBase to solicit a summary. [Date last reviewed: 2016-06-30]	positive regulation of ERK1 and ERK2 cascade ; GO:0070374 | inferred from high throughput genetic interaction with Dsor1 ovarian follicle cell development ; GO:0030707 | inferred from mutant phenotype RNA polymerase II preinitiation complex assembly ; GO:0051123 | inferred from mutant phenotype regulation of transcription, DNA-templated ; GO:0006355 | inferred from biological aspect of ancestor w…	nucleus ; GO:0005634 | inferred from biological aspect of ancestor with PANTHER:PTN001227002	zinc ion binding ; GO:0008270 | inferred from electronic annotation with InterPro:IPR012934 DNA binding ; GO:0003677 | inferred from biological aspect of ancestor with PANTHER:PTN001227002 RNA polymerase II core promoter sequence-specific DNA binding ; GO:0000979 | inferred from direct assay DNA-binding transcription factor activity ; GO:0003700 | inferred from biological aspect of ancestor with …
HMS01645	37503	FBgn0037092	M6	M6	-	oogenesis ; GO:0048477 | inferred from mutant phenotype neuron projection development ; GO:0031175 | inferred from biological aspect of ancestor with PANTHER:PTN000188291 positive phototaxis ; GO:0046956 | inferred from mutant phenotype compound eye morphogenesis ; GO:0001745 | inferred from mutant phenotype	integral component of membrane ; GO:0016021 | inferred from electronic annotation with InterPro:IPR001614 plasma membrane ; GO:0005886 | inferred from biological aspect of ancestor with PANTHER:PTN000188291 plasma membrane ; GO:0005886 | inferred from direct assay	-
HMS02020	40853	FBgn0034534	maf-S	maf-S	-	head development ; GO:0060322 | inferred from mutant phenotype positive regulation of transcription by RNA polymerase II ; GO:0045944 | inferred from direct assay	nucleus ; GO:0005634 | inferred from biological aspect of ancestor with PANTHER:PTN002561999	sequence-specific DNA binding ; GO:0043565 | inferred from biological aspect of ancestor with PANTHER:PTN002561999 protein heterodimerization activity ; GO:0046982 | inferred from physical interaction with cnc DNA-binding transcription factor activity ; GO:0003700 | inferred from biological aspect of ancestor with PANTHER:PTN002561999 RNA polymerase II proximal promoter sequence-specific DNA bind…
HMJ21239	53909	FBgn0026666	MagR	Magnetic receptor	Insufficient genetic data for FlyBase to solicit a summary. [Date last reviewed: 2016-06-30]	protein maturation by iron-sulfur cluster transfer ; GO:0097428 | inferred from biological aspect of ancestor with PANTHER:PTN001601055 response to magnetism ; GO:0071000 | inferred from direct assay iron-sulfur cluster assembly ; GO:0016226 | inferred from biological aspect of ancestor with PANTHER:PTN001601055	mitochondrion ; GO:0005739 | inferred from biological aspect of ancestor with PANTHER:PTN000007993	structural molecule activity ; GO:0005198 | inferred from electronic annotation with InterPro:IPR016092 2 iron, 2 sulfur cluster binding ; GO:0051537 | inferred from biological aspect of ancestor with PANTHER:PTN001601055
HMC03650	52910	FBgn0050359	Mal-A5	Maltase A5	Insufficient genetic data for FlyBase to solicit a summary. [Date last reviewed: 2016-06-30]	carbohydrate metabolic process ; GO:0005975 | inferred from electronic annotation with InterPro:IPR006047, InterPro:IPR006589, InterPro:IPR013781	-	maltose alpha-glucosidase activity ; GO:0032450 | inferred from sequence or structural similarity with UniProtKB:P38158
HMC03356	52111	FBgn0025815	Mcm6	Minichromosome maintenance 6	Minichromosome maintenance 6 is a subunit of the hetero-hexameric Mini-Chromosome Maintenance (MCM) Complex, which is the eukaryotic replicative DNA helicase. MCM complex requires association with CDC45L and the GINS complex for full helicase activity. [Date last reviewed: 2016-06-23]	DNA replication initiation ; GO:0006270 | inferred from electronic annotation with InterPro:IPR008049 DNA replication ; GO:0006260 | traceable author statement eggshell chorion gene amplification ; GO:0007307 | traceable author statement eggshell chorion gene amplification ; GO:0007307 | inferred from mutant phenotype DNA replication ; GO:0006260 | inferred from mutant phenotype	MCM complex ; GO:0042555 | inferred from electronic annotation with InterPro:IPR008049 nucleus ; GO:0005634 | inferred from direct assay	ATP binding ; GO:0005524 | inferred from electronic annotation with InterPro:IPR001208, InterPro:IPR008049, InterPro:IPR018525 DNA binding ; GO:0003677 | inferred from electronic annotation with InterPro:IPR001208, InterPro:IPR008049, InterPro:IPR018525 3'-5' DNA helicase activity ; GO:0043138 | contributes_to inferred from direct assay
HMS04472	57027	FBgn0038772	mdlc	midlife crisis	Midlife crisis is a nuclear protein that is required for maintaining neuronal differentiation. [Date last reviewed: 2016-06-30]	snoRNA splicing ; GO:0034247 | inferred from biological aspect of ancestor with PANTHER:PTN000309255 neuron differentiation ; GO:0030182 | inferred from mutant phenotype mRNA splicing, via spliceosome ; GO:0000398 | inferred from sequence or structural similarity with SGD:S000004315 regulation of RNA splicing ; GO:0043484 | inferred from direct assay	U2-type spliceosomal complex ; GO:0005684 | inferred from sequence or structural similarity with SGD:S000004315 U2-type spliceosomal complex ; GO:0005684 | inferred from biological aspect of ancestor with PANTHER:PTN000309255 nucleus ; GO:0005634 | inferred from direct assay	metal ion binding ; GO:0046872 | inferred from electronic annotation with InterPro:IPR000571 zinc ion binding ; GO:0008270 | inferred from sequence model
HMJ21823	57815	FBgn0036811	MED11	Mediator complex subunit 11	-	transcription by RNA polymerase II ; GO:0006366 | inferred from mutant phenotype negative regulation of neuroblast proliferation ; GO:0007406 | inferred from mutant phenotype regulation of transcription by RNA polymerase II ; GO:0006357 | inferred from sequence or structural similarity with HGNC:11473	mediator complex ; GO:0016592 | inferred from direct assay mediator complex ; GO:0016592 | inferred from biological aspect of ancestor with PANTHER:PTN001485952 nucleus ; GO:0005634 | inferred from direct assay	protein binding ; GO:0005515 | inferred from physical interaction with UniProtKB:Q8MSX2 inferred from physical interaction with UniProtKB:Q9VEC1 transcription coregulator activity ; GO:0003712 | contributes_to inferred by curator from GO:0016592 transcription coactivator activity ; GO:0003713 | inferred from sequence or structural similarity with HGNC:11473
HMS01771	38938	FBgn0250820	meigo	medial glomeruli	Medial glomeruli (Meigo) is an evolutionarily conserved, multi-membrane pass protein that is mainly localized at the endoplasmic reticulum. Meigo genetically interacts with Ephrin in dendrite targeting of olfactory projection neurons. [Date last reviewed: 2016-06-23]	dendrite guidance ; GO:0070983 | inferred from mutant phenotype axon guidance ; GO:0007411 | inferred from mutant phenotype response to endoplasmic reticulum stress ; GO:0034976 | inferred from mutant phenotype inferred from genetic interaction with Hsc70-3 UDP-galactose transmembrane transport ; GO:0072334 | inferred from biological aspect of ancestor with PANTHER:PTN000081293 protein N-linked g…	endoplasmic reticulum membrane ; GO:0005789 | inferred from direct assay integral component of endoplasmic reticulum membrane ; GO:0030176 | inferred from biological aspect of ancestor with PANTHER:PTN000081292 integral component of Golgi membrane ; GO:0030173 | inferred from biological aspect of ancestor with PANTHER:PTN000081292	UDP-galactose transmembrane transporter activity ; GO:0005459 | inferred from biological aspect of ancestor with PANTHER:PTN000081293 UDP-glucose transmembrane transporter activity ; GO:0005460 | inferred from biological aspect of ancestor with PANTHER:PTN000081293 transmembrane transporter activity ; GO:0022857 | inferred from biological aspect of ancestor with PANTHER:PTN000081292
HMJ30025	62948	FBgn0035247	metl	methyltransferase-like	-	biological_process ; GO:0008150 | no biological data available	cellular_component ; GO:0005575 | no biological data available	tRNA (cytosine-3-)-methyltransferase activity ; GO:0052735 | inferred from biological aspect of ancestor with PANTHER:PTN000516223 S-adenosylmethionine-dependent methyltransferase activity ; GO:0008757 | inferred from sequence or structural similarity with EMBL:BC006985
HMC04301	56005	FBgn0027083	MetRS-m	Methionyl-tRNA synthetase, mitochondrial	-	methionyl-tRNA aminoacylation ; GO:0006431 | inferred from biological aspect of ancestor with PANTHER:PTN000235847 methionyl-tRNA aminoacylation ; GO:0006431 | traceable author statement methionyl-tRNA aminoacylation ; GO:0006431 | inferred from sequence or structural similarity with UniProtKB:Q96GW9	mitochondrial matrix ; GO:0005759 | inferred from sequence or structural similarity with UniProtKB:Q96GW9 mitochondrion ; GO:0005739 | inferred from biological aspect of ancestor with PANTHER:PTN000942566 mitochondrion ; GO:0005739 | traceable author statement	ATP binding ; GO:0005524 | inferred from electronic annotation with InterPro:IPR009080, InterPro:IPR014758, InterPro:IPR015413 methionine-tRNA ligase activity ; GO:0004825 | traceable author statement methionine-tRNA ligase activity ; GO:0004825 | inferred from biological aspect of ancestor with PANTHER:PTN000235847 methionine-tRNA ligase activity ; GO:0004825 | inferred from sequence or structur…
HMC04737	57430	FBgn0035473	mge	maggie	maggie (mge) encodes a protein predicted to act as a receptor of the TOM (translocase of outer membrane) complex, which is involved in protein import into mitochondria. The product of mge modulates cell death induced by the expression of the mouse Bax protein. [Date last reviewed: 2018-01-25]	intracellular protein transport ; GO:0006886 | inferred from electronic annotation with InterPro:IPR005683	mitochondrial outer membrane translocase complex ; GO:0005742 | inferred from sequence or structural similarity with SGD:S000005075 mitochondrion ; GO:0005739 | inferred from direct assay	P-P-bond-hydrolysis-driven protein transmembrane transporter activity ; GO:0015450 | inferred from sequence or structural similarity with SGD:S000005075
HMC03329	51774	FBgn0262519	Mi-2	Mi-2	Mi-2 is a nuclear ATP-dependent nucleosome remodeler of the CHD family. It associates with active chromatin and utilizes the energy of ATP hydrolysis to move nucleosomes along DNA. It is required for repression of cell type-specific genes, full activation of heat shock genes and regulates higher order chromatin structure of polytene chromosomes. [Date last reviewed: 2016-06-23]	negative regulation of transcription, DNA-templated ; GO:0045892 | inferred from genetic interaction with UniProtKB:P05084 ATP-dependent chromatin remodeling ; GO:0043044 | inferred from mutant phenotype regulation of transcription by RNA polymerase II ; GO:0006357 | inferred from mutant phenotype chromosome decondensation ; GO:0051312 | inferred from mutant phenotype chromosome organization ; GO…	transcriptionally active chromatin ; GO:0035327 | inferred from direct assay nucleus ; GO:0005634 | inferred from direct assay NuRD complex ; GO:0016581 | inferred from sequence or structural similarity nucleus ; GO:0005634 | inferred from high throughput direct assay polytene chromosome ; GO:0005700 | inferred from direct assay NuRD complex ; GO:0016581 | traceable author statement cytosol ; GO:…	ATP binding ; GO:0005524 | inferred from electronic annotation with InterPro:IPR000330, InterPro:IPR002464, InterPro:IPR012957, InterPro:IPR012958 helicase activity ; GO:0004386 | inferred from sequence or structural similarity chromatin binding ; GO:0003682 | inferred from direct assay DNA binding ; GO:0003677 | inferred from direct assay nucleosome-dependent ATPase activity ; GO:0070615 | contr…
HMJ24015	62491	FBgn0039588	mIF2	mitochondrial translation initiation factor 2	Insufficient genetic data for FlyBase to solicit a summary. [Date last reviewed: 2016-06-30]	translational initiation ; GO:0006413 | inferred from sequence or structural similarity with UniProtKB:P46199 mitochondrial translation ; GO:0032543 | inferred from sequence or structural similarity with SGD:S000005383 mitochondrial translational initiation ; GO:0070124 | inferred from biological aspect of ancestor with PANTHER:PTN000561955	mitochondrion ; GO:0005739 | inferred from biological aspect of ancestor with PANTHER:PTN000561955 mitochondrion ; GO:0005739 | inferred from sequence or structural similarity with UniProtKB:P46199 mitochondrion ; GO:0005739 | inferred from sequence or structural similarity with SGD:S000005383	GTP binding ; GO:0005525 | inferred from electronic annotation with InterPro:IPR000795, InterPro:IPR005225 translation initiation factor activity ; GO:0003743 | inferred from sequence or structural similarity with SGD:S000005383 GTPase activity ; GO:0003924 | inferred from sequence or structural similarity with SGD:S000005383 tRNA binding ; GO:0000049 | inferred from sequence or structural simila…
HMS00524	32834	FBgn0034430	mip40	Myb-interacting protein 40	Myb-interacting protein 40 (mip40) encodes a subunit of the MuvB core complex. The MuvB core binds to the oncoprotein encoded by Myb and the Rbf-E2f2-Dp tumor suppressor complex, thereby controlling the expression of many genes, including critical regulators of the cell cycle. [Date last reviewed: 2018-10-18]	eggshell chorion gene amplification ; GO:0007307 | inferred by curator from GO:0031523 negative regulation of transcription by RNA polymerase II ; GO:0000122 | inferred from mutant phenotype spermatogenesis ; GO:0007283 | inferred from mutant phenotype oogenesis ; GO:0048477 | inferred from mutant phenotype	transcriptional repressor complex ; GO:0017053 | inferred from electronic annotation with InterPro:IPR028226 Myb complex ; GO:0031523 | inferred from direct assay	molecular_function ; GO:0003674 | no biological data available
HMS04493	57584	FBgn0031044	MKP-4	MAPK Phosphatase 4	Insufficient genetic data for FlyBase to solicit a summary. [Date last reviewed: 2016-06-30]	protein dephosphorylation ; GO:0006470 | non-traceable author statement dephosphorylation ; GO:0016311 | inferred from direct assay protein dephosphorylation ; GO:0006470 | inferred from biological aspect of ancestor with PANTHER:PTN000806960 negative regulation of JUN kinase activity ; GO:0043508 | inferred from mutant phenotype	nucleus ; GO:0005634 | inferred from direct assay	protein tyrosine phosphatase activity ; GO:0004725 | inferred from electronic annotation with InterPro:IPR016130 protein tyrosine/serine/threonine phosphatase activity ; GO:0008138 | non-traceable author statement phosphatase activity ; GO:0016791 | inferred from direct assay protein tyrosine/serine/threonine phosphatase activity ; GO:0008138 | inferred from biological aspect of ancestor with PAN…
HMJ02214	42558	FBgn0023215	Mnt	Mnt	Mnt (Mnt) encodes a protein that belongs to the basic-helic-loop-helix-zipper class of transcription factors, which form heterodimers with the protein encoded by Max. Mnt product acts as a repressor of transcription by recruiting a co-repressor complex to its genomic binding sites. It antagonizes cell growth promoting functions of the product encoded by Myc and its depletion produces flies with l…	regulation of transcription, DNA-templated ; GO:0006355 | inferred from sequence or structural similarity with Myc regulation of cell cycle ; GO:0051726 | inferred from mutant phenotype negative regulation of transcription by RNA polymerase II ; GO:0000122 | inferred from direct assay negative regulation of cell growth ; GO:0030308 | inferred from mutant phenotype regulation of transcription, DNA…	nucleus ; GO:0005634 | inferred from high throughput direct assay nucleus ; GO:0005634 | inferred by curator from GO:0003700 nucleoplasm ; GO:0005654 | inferred from high throughput direct assay nucleus ; GO:0005634 | inferred from direct assay	sequence-specific DNA binding ; GO:0043565 | inferred from direct assay DNA-binding transcription factor activity ; GO:0003700 | inferred from sequence or structural similarity with Myc protein heterodimerization activity ; GO:0046982 | inferred from physical interaction with Max inferred from physical interaction with Sin3A protein binding ; GO:0005515 | inferred from physical interaction with M…
HMS02023	40856	FBgn0002791	mr	morula	Morula (Mr) is the APC2 subunit of the Anaphase Promoting Complex (APC). Mr strong alleles produce lethality, metaphase arrest and neuroblast polyploidy. Mr weak alleles result in female sterility, affecting the endocycle in the nurse cells, as well as metaphase arrest in early embryonic mitoses. [Date last reviewed: 2017-02-09]	regulation of cell cycle ; GO:0051726 | traceable author statement negative regulation of synaptic growth at neuromuscular junction ; GO:0045886 | inferred from mutant phenotype anaphase-promoting complex-dependent catabolic process ; GO:0031145 | inferred from sequence or structural similarity with SGD:S000004117 modulation of chemical synaptic transmission ; GO:0050804 | inferred from mutant ph…	ubiquitin ligase complex ; GO:0000151 | inferred from direct assay anaphase-promoting complex ; GO:0005680 | inferred from direct assay anaphase-promoting complex ; GO:0005680 | traceable author statement anaphase-promoting complex ; GO:0005680 | inferred from biological aspect of ancestor with PANTHER:PTN000231994	ubiquitin protein ligase binding ; GO:0031625 | inferred from electronic annotation with InterPro:IPR001373 ubiquitin protein ligase activity ; GO:0061630 | inferred from sequence or structural similarity with SGD:S000004117
HMS04494	57297	FBgn0030556	mRNA-cap	mRNA-capping-enzyme	Insufficient genetic data for FlyBase to solicit a summary. [Date last reviewed: 2016-06-30]	dephosphorylation ; GO:0016311 | inferred from electronic annotation with InterPro:IPR000340, InterPro:IPR000387, InterPro:IPR016130 positive regulation of smoothened signaling pathway ; GO:0045880 | inferred from mutant phenotype 7-methylguanosine mRNA capping ; GO:0006370 | inferred from genetic interaction with UniProtKB:O60942 7-methylguanosine mRNA capping ; GO:0006370 | inferred from biolog…	nucleus ; GO:0005634 | inferred from direct assay nucleus ; GO:0005634 | inferred from sequence or structural similarity with SGD:S000003098 cytoplasm ; GO:0005737 | inferred from direct assay	protein tyrosine phosphatase activity ; GO:0004725 | inferred from electronic annotation with InterPro:IPR016130 polynucleotide 5'-phosphatase activity ; GO:0004651 | inferred from electronic annotation with InterPro:IPR017074 protein tyrosine/serine/threonine phosphatase activity ; GO:0008138 | inferred from electronic annotation with InterPro:IPR000340 protein tyrosine/serine/threonine phosphat…
HMJ23590	61964	FBgn0040389	mRpL14	mitochondrial ribosomal protein L14	-	translation ; GO:0006412 | inferred from sequence or structural similarity with EMBL:AA642134 mitochondrial translation ; GO:0032543 | traceable author statement	mitochondrial large ribosomal subunit ; GO:0005762 | inferred from sequence or structural similarity with EMBL:AA642134 mitochondrial large ribosomal subunit ; GO:0005762 | traceable author statement mitochondrion ; GO:0005739 | inferred from biological aspect of ancestor with PANTHER:PTN001077771	structural constituent of ribosome ; GO:0003735 | traceable author statement structural constituent of ribosome ; GO:0003735 | inferred from sequence or structural similarity with EMBL:AA642134
HMJ22045	58109	FBgn0036335	mRpL20	mitochondrial ribosomal protein L20	-	ribosomal large subunit assembly ; GO:0000027 | inferred from biological aspect of ancestor with PANTHER:PTN000105838 translation ; GO:0006412 | inferred from sequence or structural similarity with EMBL:AB049644 mitochondrial translation ; GO:0032543 | traceable author statement	mitochondrial ribosome ; GO:0005761 | inferred from biological aspect of ancestor with PANTHER:PTN000105858 mitochondrial large ribosomal subunit ; GO:0005762 | traceable author statement mitochondrial large ribosomal subunit ; GO:0005762 | inferred from sequence or structural similarity with EMBL:AB049644	rRNA binding ; GO:0019843 | inferred from electronic annotation with InterPro:IPR005813 structural constituent of ribosome ; GO:0003735 | inferred from biological aspect of ancestor with PANTHER:PTN000105838 structural constituent of ribosome ; GO:0003735 | inferred from sequence or structural similarity with EMBL:AB049644 structural constituent of ribosome ; GO:0003735 | traceable author stateme…
HMJ24012	62489	FBgn0042112	mRpL36	mitochondrial ribosomal protein L36	Insufficient genetic data for FlyBase to solicit a summary. [Date last reviewed: 2016-06-30]	mitochondrial translation ; GO:0032543 | inferred from sequence or structural similarity with SGD:S000000326 mitochondrial translation ; GO:0032543 | traceable author statement	mitochondrial large ribosomal subunit ; GO:0005762 | inferred from sequence or structural similarity with SGD:S000000326 mitochondrial large ribosomal subunit ; GO:0005762 | traceable author statement mitochondrion ; GO:0005739 | inferred from sequence or structural similarity with SGD:S000000326	structural constituent of ribosome ; GO:0003735 | traceable author statement structural constituent of ribosome ; GO:0003735 | inferred from sequence or structural similarity with SGD:S000000326
HMC04905	57716	FBgn0038678	mRpL55	mitochondrial ribosomal protein L55	Mitochondrial ribosomal protein L55 is involved in mitochondrial biogenesis and cell division. [Date last reviewed: 2016-12-15]	translation ; GO:0006412 | inferred from biological aspect of ancestor with PANTHER:PTN002147485 mitochondrial translation ; GO:0032543 | traceable author statement translation ; GO:0006412 | inferred from sequence or structural similarity with UniProtKB:P0C2B8	mitochondrial large ribosomal subunit ; GO:0005762 | inferred from biological aspect of ancestor with PANTHER:PTN002147485 mitochondrial large ribosomal subunit ; GO:0005762 | inferred from sequence or structural similarity with UniProtKB:P0C2B8 mitochondrial large ribosomal subunit ; GO:0005762 | traceable author statement mitochondrial large ribosomal subunit ; GO:0005762 | inferred from sequen…	structural constituent of ribosome ; GO:0003735 | traceable author statement structural constituent of ribosome ; GO:0003735 | inferred from biological aspect of ancestor with PANTHER:PTN002147485 structural constituent of ribosome ; GO:0003735 | inferred from sequence or structural similarity with UniProtKB:P0C2B8 structural constituent of ribosome ; GO:0003735 | inferred from sequence or struct…
HMJ23340	61851	FBgn0032849	mRpS18B	mitochondrial ribosomal protein S18B	Insufficient genetic data for FlyBase to solicit a summary. [Date last reviewed: 2016-06-30]	mitochondrial translation ; GO:0032543 | traceable author statement mitochondrial translation ; GO:0032543 | inferred from sequence or structural similarity with UniProtKB:P82918 translation ; GO:0006412 | inferred from sequence or structural similarity with UniProtKB:Q9Y676	mitochondrial small ribosomal subunit ; GO:0005763 | inferred from sequence or structural similarity with UniProtKB:Q9Y676 mitochondrion ; GO:0005739 | inferred from biological aspect of ancestor with PANTHER:PTN001000149 mitochondrial small ribosomal subunit ; GO:0005763 | traceable author statement mitochondrial small ribosomal subunit ; GO:0005763 | inferred from sequence or structural similar…	structural constituent of ribosome ; GO:0003735 | inferred from sequence or structural similarity with UniProtKB:P82918 structural constituent of ribosome ; GO:0003735 | traceable author statement structural constituent of ribosome ; GO:0003735 | inferred from sequence or structural similarity with UniProtKB:Q9Y676
HMJ22708	60417	FBgn0044510	mRpS5	mitochondrial ribosomal protein S5	Insufficient genetic data for FlyBase to solicit a summary. [Date last reviewed: 2016-06-30]	translation ; GO:0006412 | inferred from sequence or structural similarity with UniProtKB:P82675 mitochondrial translation ; GO:0032543 | traceable author statement	mitochondrial small ribosomal subunit ; GO:0005763 | traceable author statement mitochondrial small ribosomal subunit ; GO:0005763 | inferred from sequence or structural similarity with UniProtKB:P82675 mitochondrial small ribosomal subunit ; GO:0005763 | inferred from biological aspect of ancestor with PANTHER:PTN000346855	RNA binding ; GO:0003723 | inferred from electronic annotation with InterPro:IPR013810 structural constituent of ribosome ; GO:0003735 | inferred from biological aspect of ancestor with PANTHER:PTN000346706 structural constituent of ribosome ; GO:0003735 | traceable author statement structural constituent of ribosome ; GO:0003735 | inferred from sequence or structural similarity with UniProtKB:P8…
HMJ02084	42518	FBgn0010909	msn	misshapen	Misshapen is a Sterile 20 MAP kinase kinase kinase. [Date last reviewed: 2017-02-09]	regulation of embryonic cell shape ; GO:0016476 | inferred from mutant phenotype neuron projection morphogenesis ; GO:0048812 | inferred from biological aspect of ancestor with PANTHER:PTN000685430 axon guidance ; GO:0007411 | inferred from mutant phenotype activation of MAPKKK activity ; GO:0000185 | non-traceable author statement response to wounding ; GO:0009611 | inferred from expression patt…	contractile ring ; GO:0070938 | colocalizes_with inferred from high throughput direct assay cytoplasm ; GO:0005737 | inferred from biological aspect of ancestor with PANTHER:PTN000684825 cell cortex ; GO:0005938 | inferred from direct assay	ATP binding ; GO:0005524 | inferred from electronic annotation with InterPro:IPR000719, InterPro:IPR002290, InterPro:IPR017441 MAP kinase kinase kinase kinase activity ; GO:0008349 | inferred from electronic annotation with InterPro:IPR021160 protein serine/threonine kinase activity ; GO:0004674 | inferred from biological aspect of ancestor with PANTHER:PTN000684825 JUN kinase kinase kinase kinas…
HMS01906	38990	FBgn0027948	msps	mini spindles	-	cytoplasmic microtubule organization ; GO:0031122 | inferred from mutant phenotype centrosome duplication ; GO:0051298 | inferred from biological aspect of ancestor with PANTHER:PTN000288762 endoplasmic reticulum organization ; GO:0007029 | inferred from mutant phenotype establishment or maintenance of neuroblast polarity ; GO:0045196 | inferred from mutant phenotype female meiotic nuclear divisi…	spindle pole ; GO:0000922 | inferred from biological aspect of ancestor with PANTHER:PTN000288762 microtubule plus-end ; GO:0035371 | colocalizes_with inferred from biological aspect of ancestor with PANTHER:PTN000288762 centrosome ; GO:0005813 | non-traceable author statement centrosome ; GO:0005813 | inferred from biological aspect of ancestor with PANTHER:PTN000288762 spindle pole ; GO:0000922…	tubulin binding ; GO:0015631 | inferred from direct assay microtubule plus-end binding ; GO:0051010 | inferred from biological aspect of ancestor with PANTHER:PTN000288762 microtubule binding ; GO:0008017 | inferred from sequence or structural similarity with NCBI_gi:2136282 protein binding ; GO:0005515 | inferred from physical interaction with tacc
HMS01667	38224	FBgn0028707	Mt2	Methyltransferase 2	Methyltransferase 2 is a (cytosine-5) tRNA methyltransferase. The modification protects tRNAs against endonucleolytic cleavage and contributes to stress resistance, protein translation and small RNA-mediated gene regulation. [Date last reviewed: 2016-06-23]	telomere maintenance ; GO:0000723 | inferred from mutant phenotype DNA methylation involved in embryo development ; GO:0043045 | inferred from mutant phenotype response to oxidative stress ; GO:0006979 | inferred from mutant phenotype tRNA methylation ; GO:0030488 | inferred from mutant phenotype positive regulation of innate immune response ; GO:0045089 | inferred from mutant phenotype positive …	nuclear matrix ; GO:0016363 | inferred from direct assay nucleus ; GO:0005634 | inferred from direct assay nucleolus ; GO:0005730 | NOT inferred from direct assay nucleosome ; GO:0000786 | NOT inferred from direct assay cytoplasmic stress granule ; GO:0010494 | inferred from direct assay	tRNA methyltransferase activity ; GO:0008175 | inferred from mutant phenotype DNA (cytosine-5-)-methyltransferase activity ; GO:0003886 | inferred from sequence or structural similarity methyltransferase activity ; GO:0008168 | inferred from sequence or structural similarity with MGI:MGI:1274787 DNA (cytosine-5-)-methyltransferase activity ; GO:0003886 | inferred from direct assay
HMS01902	38986	FBgn0027786	Mtch	Mitochondrial carrier homolog 1	-	-	-	-
HMJ23618	61992	FBgn0260386	mtg	mind the gap	-	chitin metabolic process ; GO:0006030 | inferred from electronic annotation with InterPro:IPR002557 synapse assembly ; GO:0007416 | inferred from direct assay	synaptic cleft ; GO:0043083 | inferred from direct assay extracellular region ; GO:0005576 | inferred from direct assay terminal bouton ; GO:0043195 | inferred from direct assay extracellular space ; GO:0005615 | inferred from direct assay	chitin binding ; GO:0008061 | inferred from electronic annotation with InterPro:IPR002557 carbohydrate derivative binding ; GO:0097367 | inferred from direct assay
HMC03186	51932	FBgn0039532	Mtl	Mig-2-like	-	lamellipodium assembly ; GO:0030032 | inferred from mutant phenotype actin filament organization ; GO:0007015 | inferred from biological aspect of ancestor with PANTHER:PTN001178288 dorsal closure ; GO:0007391 | inferred from mutant phenotype cell migration ; GO:0016477 | inferred from biological aspect of ancestor with PANTHER:PTN001178288 morphogenesis of an epithelium ; GO:0002009 | traceable …	neuron projection ; GO:0043005 | inferred from biological aspect of ancestor with PANTHER:PTN002514689 cell projection ; GO:0042995 | inferred from biological aspect of ancestor with PANTHER:PTN002514688 plasma membrane ; GO:0005886 | inferred from biological aspect of ancestor with PANTHER:PTN001178288 cytoskeleton ; GO:0005856 | colocalizes_with inferred from biological aspect of ancestor with …	GTP binding ; GO:0005525 | inferred from biological aspect of ancestor with PANTHER:PTN000632671 GTPase activity ; GO:0003924 | inferred from sequence or structural similarity with WB:WBGene00003239 GTPase activity ; GO:0003924 | inferred from biological aspect of ancestor with PANTHER:PTN000632671 protein kinase binding ; GO:0019901 | inferred from biological aspect of ancestor with PANTHER:PTN0…
HMJ23337	61849	FBgn0028530	mTTF	mitochondrial transcription termination factor	mitochondrial transcription termination factor (mTTF) encodes a sequence-specific DNA binding protein that interacts with two regions of the mitochondrial genome, each located at the common 3' end of oppositely transcribed gene clusters. The mTTF product arrests transcription in the 'forward' direction, as well as acting as a replication fork barrier, which is believed to prevent collisions betwe…	regulation of transcription, DNA-templated ; GO:0006355 | inferred from electronic annotation with InterPro:IPR003690 termination of mitochondrial transcription ; GO:0006393 | inferred from biological aspect of ancestor with PANTHER:PTN001035337 termination of mitochondrial transcription ; GO:0006393 | inferred from direct assay	mitochondrion ; GO:0005739 | inferred from direct assay	double-stranded DNA binding ; GO:0003690 | inferred from electronic annotation with InterPro:IPR003690 DNA binding ; GO:0003677 | inferred from direct assay
HMC05134	62840	FBgn0052656	Muc11A	Mucin 11A	Insufficient genetic data for FlyBase to solicit a summary. [Date last reviewed: 2016-06-30]	chitin metabolic process ; GO:0006030 | inferred from electronic annotation with InterPro:IPR002557	extracellular region ; GO:0005576 | inferred from electronic annotation with InterPro:IPR002557 extracellular matrix ; GO:0031012 | inferred from sequence model	chitin binding ; GO:0008061 | inferred from electronic annotation with InterPro:IPR002557 extracellular matrix structural constituent ; GO:0005201 | inferred from sequence model
HMS00381	34951	FBgn0002909	mus312	mutagen-sensitive 312	Mutagen-sensitive 312 is a scaffolding protein that interacts with at least three structure-selective endonucleases (mei-9-Ercc1, mus81-mms4, and slx1). It is involved in DNA repair and meiotic recombination pathways. [Date last reviewed: 2016-06-23]	DNA replication ; GO:0006260 | inferred from electronic annotation with InterPro:IPR018574 meiotic chromosome segregation ; GO:0045132 | inferred from mutant phenotype meiotic DNA double-strand break processing ; GO:0000706 | inferred from biological aspect of ancestor with PANTHER:PTN001853063 interstrand cross-link repair ; GO:0036297 | inferred from biological aspect of ancestor with PANTHER:P…	Slx1-Slx4 complex ; GO:0033557 | inferred from direct assay Slx1-Slx4 complex ; GO:0033557 | inferred from biological aspect of ancestor with PANTHER:PTN001853063 protein-containing complex ; GO:0032991 | inferred from direct assay	protein binding ; GO:0005515 | inferred from physical interaction with slx1 protein binding ; GO:0005515 | inferred from physical interaction with mei-9 5'-flap endonuclease activity ; GO:0017108 | contributes_to inferred from biological aspect of ancestor with PANTHER:PTN001853063 crossover junction endodeoxyribonuclease activity ; GO:0008821 | contributes_to inferred from biological aspect of a…
HMS00381	34951	FBgn0002909	mus312	mutagen-sensitive 312	Mutagen-sensitive 312 is a scaffolding protein that interacts with at least three structure-selective endonucleases (mei-9-Ercc1, mus81-mms4, and slx1). It is involved in DNA repair and meiotic recombination pathways. [Date last reviewed: 2016-06-23]	DNA replication ; GO:0006260 | inferred from electronic annotation with InterPro:IPR018574 meiotic chromosome segregation ; GO:0045132 | inferred from mutant phenotype meiotic DNA double-strand break processing ; GO:0000706 | inferred from biological aspect of ancestor with PANTHER:PTN001853063 interstrand cross-link repair ; GO:0036297 | inferred from biological aspect of ancestor with PANTHER:P…	Slx1-Slx4 complex ; GO:0033557 | inferred from direct assay Slx1-Slx4 complex ; GO:0033557 | inferred from biological aspect of ancestor with PANTHER:PTN001853063 protein-containing complex ; GO:0032991 | inferred from direct assay	protein binding ; GO:0005515 | inferred from physical interaction with slx1 protein binding ; GO:0005515 | inferred from physical interaction with mei-9 5'-flap endonuclease activity ; GO:0017108 | contributes_to inferred from biological aspect of ancestor with PANTHER:PTN001853063 crossover junction endodeoxyribonuclease activity ; GO:0008821 | contributes_to inferred from biological aspect of a…
HMC04849	57534	FBgn0040298	Myt1	Myt1	-	female meiotic nuclear division ; GO:0007143 | inferred from mutant phenotype meiotic cell cycle ; GO:0051321 | inferred from mutant phenotype protein phosphorylation ; GO:0006468 | inferred from direct assay negative regulation of mitotic cell cycle ; GO:0045930 | inferred from mutant phenotype male meiotic nuclear division ; GO:0007140 | inferred from mutant phenotype spermatogonial cell divisi…	membrane ; GO:0016020 | inferred from electronic annotation with InterPro:IPR016235 Golgi apparatus ; GO:0005794 | inferred from direct assay nucleus ; GO:0005634 | inferred from biological aspect of ancestor with PANTHER:PTN000113604	ATP binding ; GO:0005524 | inferred from electronic annotation with InterPro:IPR000719, InterPro:IPR017441 protein serine/threonine kinase activity ; GO:0004674 | inferred from electronic annotation with InterPro:IPR016235 protein kinase activity ; GO:0004672 | inferred from biological aspect of ancestor with PANTHER:PTN000113601 protein serine/threonine/tyrosine kinase activity ; GO:0004712 | in…
HMC04814	57499	FBgn0039909	ND-49	NADH dehydrogenase (ubiquinone) 49 kDa subunit	Insufficient genetic data for FlyBase to solicit a summary. [Date last reviewed: 2016-06-30]	mitochondrial electron transport, NADH to ubiquinone ; GO:0006120 | inferred from sequence or structural similarity with UniProtKB:O95299	mitochondrial respiratory chain complex I ; GO:0005747 | inferred from sequence or structural similarity with UniProtKB:O95299 mitochondrion ; GO:0005739 | inferred from high throughput direct assay	NAD binding ; GO:0051287 | inferred from electronic annotation with InterPro:IPR001135 quinone binding ; GO:0048038 | inferred from electronic annotation with InterPro:IPR001135 NADH dehydrogenase activity ; GO:0003954 | inferred from sequence or structural similarity with UniProtKB:O95299
HMJ23156	61321	FBgn0034645	ND-B12	NADH dehydrogenase (ubiquinone) B12 subunit	Insufficient genetic data for FlyBase to solicit a summary. [Date last reviewed: 2016-06-30]	mitochondrial respiratory chain complex I assembly ; GO:0032981 | inferred from biological aspect of ancestor with PANTHER:PTN001031099 mitochondrial electron transport, NADH to ubiquinone ; GO:0006120 | inferred from sequence or structural similarity with UniProtKB:O43676	mitochondrial respiratory chain complex I ; GO:0005747 | inferred from biological aspect of ancestor with PANTHER:PTN001031099 mitochondrial respiratory chain complex I ; GO:0005747 | inferred from sequence or structural similarity with UniProtKB:O43676	NADH dehydrogenase activity ; GO:0003954 | inferred from sequence or structural similarity with UniProtKB:O43676
HMS00665	32877	FBgn0032393	Nfs1	Nfs1 cysteine desulfurase	Insufficient genetic data for FlyBase to solicit a summary. [Date last reviewed: 2016-06-30]	[2Fe-2S] cluster assembly ; GO:0044571 | inferred from electronic annotation with InterPro:IPR010240 mitochondrial tRNA thio-modification ; GO:0070903 | inferred from sequence or structural similarity with UniProtKB:P25374 iron-sulfur cluster assembly ; GO:0016226 | inferred from sequence or structural similarity with UniProtKB:P25374 iron-sulfur cluster assembly ; GO:0016226 | inferred from dire…	nucleus ; GO:0005634 | inferred from direct assay L-cysteine desulfurase complex ; GO:1990221 | inferred from physical interaction with bcn92 L-cysteine desulfurase complex ; GO:1990221 | inferred from sequence or structural similarity with UniProtKB:P25374 cytosol ; GO:0005829 | inferred from direct assay mitochondrion ; GO:0005739 | inferred from sequence or structural similarity with UniProtKB…	pyridoxal phosphate binding ; GO:0030170 | inferred from electronic annotation with InterPro:IPR010240 cysteine desulfurase activity ; GO:0031071 | inferred from sequence or structural similarity with UniProtKB:P25374 cysteine desulfurase activity ; GO:0031071 | inferred from direct assay
HMJ02081	56852	FBgn0027548	nito	spenito	-	positive regulation of canonical Wnt signaling pathway ; GO:0090263 | inferred from genetic interaction with arm inferred from genetic interaction with wg positive regulation of gene expression ; GO:0010628 | inferred from genetic interaction with Hipk wing disc pattern formation ; GO:0035222 | inferred from mutant phenotype negative regulation of stem cell differentiation ; GO:2000737 | inferred…	nucleus ; GO:0005634 | inferred from biological aspect of ancestor with PANTHER:PTN000573351 nucleus ; GO:0005634 | inferred from direct assay RNA N6-methyladenosine methyltransferase complex ; GO:0036396 | inferred from direct assay precatalytic spliceosome ; GO:0071011 | inferred from high throughput direct assay	mRNA binding ; GO:0003729 | inferred from sequence or structural similarity RNA binding ; GO:0003723 | inferred from sequence or structural similarity with UniProtKB:P53617
HMS02200	41667	FBgn0010399	Nmdar1	NMDA receptor 1	-	ion transport ; GO:0006811 | inferred from electronic annotation with InterPro:IPR001508 long-term memory ; GO:0007616 | inferred from mutant phenotype calcium ion homeostasis ; GO:0055074 | inferred from mutant phenotype long-term memory ; GO:0007616 | inferred from genetic interaction with Nmdar2 regulation of membrane potential ; GO:0042391 | inferred from mutant phenotype ionotropic glutamate…	integral component of membrane ; GO:0016021 | inferred from direct assay postsynaptic membrane ; GO:0045211 | inferred from direct assay NMDA selective glutamate receptor complex ; GO:0017146 | inferred from biological aspect of ancestor with PANTHER:PTN001451205 plasma membrane ; GO:0005886 | inferred from biological aspect of ancestor with PANTHER:PTN000437926 NMDA selective glutamate receptor …	NMDA glutamate receptor activity ; GO:0004972 | inferred from biological aspect of ancestor with PANTHER:PTN001451205 NMDA glutamate receptor activity ; GO:0004972 | inferred from sequence or structural similarity NMDA glutamate receptor activity ; GO:0004972 | contributes_to inferred from direct assay
HMS02628	42935	FBgn0038585	Non3	Novel nucleolar protein 3	Insufficient genetic data for FlyBase to solicit a summary. [Date last reviewed: 2016-06-30]	mitotic spindle assembly ; GO:0090307 | inferred from mutant phenotype ribosomal large subunit assembly ; GO:0000027 | inferred from biological aspect of ancestor with PANTHER:PTN000296192 maturation of LSU-rRNA from tricistronic rRNA transcript (SSU-rRNA, 5.8S rRNA, LSU-rRNA) ; GO:0000463 | inferred from biological aspect of ancestor with PANTHER:PTN000296192	nucleolus ; GO:0005730 | inferred from biological aspect of ancestor with PANTHER:PTN000296192 nucleolus ; GO:0005730 | inferred from direct assay	rRNA binding ; GO:0019843 | inferred from electronic annotation with InterPro:IPR039770
HMC03949	55262	FBgn0026196	nop5	nop5	Insufficient genetic data for FlyBase to solicit a summary. [Date last reviewed: 2016-06-30]	rRNA processing ; GO:0006364 | inferred from sequence or structural similarity with SGD:S000005837	small-subunit processome ; GO:0032040 | inferred from biological aspect of ancestor with PANTHER:PTN000096022 box C/D snoRNP complex ; GO:0031428 | inferred from biological aspect of ancestor with PANTHER:PTN000096022 nucleolus ; GO:0005730 | inferred from sequence or structural similarity with SGD:S000005837 inferred from direct assay	snoRNA binding ; GO:0030515 | inferred from biological aspect of ancestor with PANTHER:PTN000096022
HMJ22363	58279	FBgn0030344	Nrd1	Nardilysin	-	proteolysis ; GO:0006508 | inferred from electronic annotation with InterPro:IPR001431 chaperone-mediated protein folding ; GO:0061077 | inferred from direct assay	mitochondrion ; GO:0005739 | inferred from direct assay chaperone complex ; GO:0101031 | inferred from direct assay	metalloendopeptidase activity ; GO:0004222 | inferred from electronic annotation with InterPro:IPR001431 metal ion binding ; GO:0046872 | inferred from electronic annotation with InterPro:IPR011237, InterPro:IPR011249 protein folding chaperone ; GO:0044183 | inferred from direct assay
HMJ22547	60367	FBgn0032946	nrv3	nervana 3	Nervana 3 (Nrv3) is one of three beta subunits of the sodium-potassium pump (ATPalpha). Nrv3 is expressed in the nervous system, including subsets of the CNS and Johnston's organ neurons, and is required for hearing. [Date last reviewed: 2017-03-02]	response to auditory stimulus ; GO:0010996 | inferred from mutant phenotype sensory perception of sound ; GO:0007605 | inferred from mutant phenotype potassium ion import across plasma membrane ; GO:1990573 | inferred from biological aspect of ancestor with PANTHER:PTN000897489 cellular sodium ion homeostasis ; GO:0006883 | inferred from biological aspect of ancestor with PANTHER:PTN000897489 sod…	sodium:potassium-exchanging ATPase complex ; GO:0005890 | inferred from biological aspect of ancestor with PANTHER:PTN000897489	sodium:potassium-exchanging ATPase activity ; GO:0005391 | contributes_to inferred from biological aspect of ancestor with PANTHER:PTN000897489 ATPase activator activity ; GO:0001671 | inferred from biological aspect of ancestor with PANTHER:PTN000897489
HMJ23534	61950	FBgn0038473	Ns1	Nucleostemin 1	Nucleostemin 1 (Ns1) encodes a GTPase that is enriched in the peripheral granular components of nucleoli of most larval and adult cells. It is required for nucleolar release of the large ribosomal subunit. Depletion of the Ns1 product reduces viability of midgut imaginal island cells and ribosome abundance in polyploid cells. [Date last reviewed: 2018-11-15]	ribosomal large subunit biogenesis ; GO:0042273 | inferred from mutant phenotype regulation of multicellular organism growth ; GO:0040014 | inferred from mutant phenotype mitotic spindle assembly ; GO:0090307 | inferred from mutant phenotype regulation of cell population proliferation ; GO:0042127 | inferred from mutant phenotype	nucleolus ; GO:0005730 | inferred from direct assay nucleolus ; GO:0005730 | inferred from biological aspect of ancestor with PANTHER:PTN000119956 granular component ; GO:0001652 | inferred from direct assay	GTPase activity ; GO:0003924 | inferred from direct assay ATPase activity ; GO:0016887 | inferred from direct assay GTP binding ; GO:0005525 | inferred from sequence or structural similarity with UniProtKB:Q811S9
HMJ22458	58328	FBgn0262527	nsl1	non-specific lethal 1	-	germarium-derived female germ-line cyst formation ; GO:0030727 | inferred from genetic interaction with nos larval somatic muscle development ; GO:0007526 | inferred from mutant phenotype positive regulation of transcription, DNA-templated ; GO:0045893 | inferred from mutant phenotype germ-line stem cell population maintenance ; GO:0030718 | inferred from genetic interaction with nos regulation o…	NSL complex ; GO:0044545 | inferred from biological aspect of ancestor with PANTHER:PTN001095998 nucleus ; GO:0005634 | inferred from direct assay polytene chromosome interband ; GO:0005705 | inferred from direct assay cytoplasm ; GO:0005737 | inferred from direct assay NSL complex ; GO:0044545 | inferred from direct assay	histone acetyltransferase activity (H4-K8 specific) ; GO:0043996 | contributes_to inferred from biological aspect of ancestor with PANTHER:PTN001095998 histone acetyltransferase activity (H4-K16 specific) ; GO:0046972 | contributes_to inferred from biological aspect of ancestor with PANTHER:PTN001095998 protein binding ; GO:0005515 | inferred from physical interaction with Rcd5 histone acetyltran…
HMJ22393	58290	FBgn0039004	Nup133	Nucleoporin 133kD	Insufficient genetic data for FlyBase to solicit a summary. [Date last reviewed: 2016-06-30]	nuclear pore distribution ; GO:0031081 | inferred from biological aspect of ancestor with PANTHER:PTN000334066 protein import into nucleus ; GO:0006606 | inferred from biological aspect of ancestor with PANTHER:PTN000334066 mRNA export from nucleus ; GO:0006406 | inferred from sequence or structural similarity with HGNC:18016	nuclear pore outer ring ; GO:0031080 | inferred from sequence or structural similarity with HGNC:18016 nuclear pore outer ring ; GO:0031080 | inferred from biological aspect of ancestor with PANTHER:PTN000334066 condensed chromosome kinetochore ; GO:0000777 | colocalizes_with inferred from biological aspect of ancestor with PANTHER:PTN000334066	structural constituent of nuclear pore ; GO:0017056 | inferred from sequence or structural similarity with HGNC:18016 structural constituent of nuclear pore ; GO:0017056 | inferred from biological aspect of ancestor with PANTHER:PTN000334066
HMC03668	52927	FBgn0034118	Nup62	Nucleoporin 62kD	-	oocyte karyosome formation ; GO:0030717 | inferred from mutant phenotype inferred from genetic interaction with UniProtKB:Q7K0D8 inferred from genetic interaction with UniProtKB:Q9V463 inferred from genetic interaction with UniProtKB:Q9VKJ3 inferred from genetic interaction with UniProtKB:Q9VWE6 regulation of nucleus size ; GO:0097298 | inferred from mutant phenotype protein import into nucleus ;…	nuclear envelope ; GO:0005635 | inferred from direct assay chromatin ; GO:0000785 | inferred from mutant phenotype nuclear pore central transport channel ; GO:0044613 | inferred from biological aspect of ancestor with PANTHER:PTN000249931 nuclear pore central transport channel ; GO:0044613 | inferred from sequence or structural similarity with SGD:S000003577	structural constituent of nuclear pore ; GO:0017056 | inferred from biological aspect of ancestor with PANTHER:PTN000249931 chromatin DNA binding ; GO:0031490 | inferred from mutant phenotype phospholipid binding ; GO:0005543 | inferred from biological aspect of ancestor with PANTHER:PTN000249931 structural constituent of nuclear pore ; GO:0017056 | inferred from sequence or structural similarity…
HMJ22916	61195	FBgn0033508	Obp46a	Odorant-binding protein 46a	Insufficient genetic data for FlyBase to solicit a summary. [Date last reviewed: 2016-06-30]	sensory perception of chemical stimulus ; GO:0007606 | inferred from sequence or structural similarity with lush sensory perception of chemical stimulus ; GO:0007606 | inferred from sequence alignment with UniProtKB:P34174	extracellular region ; GO:0005576 | inferred from sequence model	odorant binding ; GO:0005549 | inferred from sequence or structural similarity with lush odorant binding ; GO:0005549 | inferred from sequence alignment with UniProtKB:P34174
HMJ21588	54851	FBgn0040296	Ocho	Ocho	Insufficient genetic data for FlyBase to solicit a summary. [Date last reviewed: 2016-06-30]	Notch signaling pathway ; GO:0007219 | inferred from biological aspect of ancestor with PANTHER:PTN000262353 cell fate specification ; GO:0001708 | inferred from biological aspect of ancestor with PANTHER:PTN000262353 negative regulation of Notch signaling pathway ; GO:0045746 | inferred from sequence or structural similarity with UniProtKB:O97179 sensory organ development ; GO:0007423 | inferred…	-	ubiquitin protein ligase binding ; GO:0031625 | inferred from biological aspect of ancestor with PANTHER:PTN000262353 ubiquitin protein ligase binding ; GO:0031625 | inferred from physical interaction with neur
HMJ22156	58179	FBgn0038980	Octbeta1R	Octopamine beta1 receptor	-	G protein-coupled receptor signaling pathway ; GO:0007186 | inferred from sequence or structural similarity adenylate cyclase-modulating G protein-coupled receptor signaling pathway ; GO:0007188 | inferred from direct assay adenylate cyclase-activating G protein-coupled receptor signaling pathway ; GO:0007189 | inferred from direct assay positive regulation of cytosolic calcium ion concentration …	integral component of plasma membrane ; GO:0005887 | inferred from direct assay integral component of membrane ; GO:0016021 | inferred from sequence or structural similarity integral component of membrane ; GO:0016021 | non-traceable author statement integral component of plasma membrane ; GO:0005887 | inferred by curator from GO:0004989	adrenergic receptor activity ; GO:0004935 | inferred from electronic annotation with InterPro:IPR002233 octopamine receptor activity ; GO:0004989 | inferred from direct assay octopamine receptor activity ; GO:0004989 | inferred from biological aspect of ancestor with PANTHER:PTN001206597 G protein-coupled amine receptor activity ; GO:0008227 | inferred from sequence or structural similarity
HMJ23640	62283	FBgn0250910	Octbeta3R	Octopamine beta3 receptor	Insufficient genetic data for FlyBase to solicit a summary. [Date last reviewed: 2016-06-30]	adenylate cyclase-activating G protein-coupled receptor signaling pathway ; GO:0007189 | inferred from sequence or structural similarity with UniProtKB:Q9VCZ3 inferred from direct assay G protein-coupled receptor signaling pathway ; GO:0007186 | inferred from sequence or structural similarity G protein-coupled receptor signaling pathway ; GO:0007186 | inferred from direct assay	integral component of plasma membrane ; GO:0005887 | inferred from direct assay integral component of membrane ; GO:0016021 | inferred from sequence or structural similarity	octopamine receptor activity ; GO:0004989 | inferred from biological aspect of ancestor with PANTHER:PTN001206597 octopamine receptor activity ; GO:0004989 | inferred from sequence or structural similarity with UniProtKB:Q9VCZ3 inferred from direct assay G protein-coupled amine receptor activity ; GO:0008227 | inferred from sequence or structural similarity
HMC05191	62184	FBgn0038551	Odj	Oddjob	-	heterochromatin organization involved in chromatin silencing ; GO:0070868 | inferred from mutant phenotype	nucleus ; GO:0005634 | inferred from electronic annotation with InterPro:IPR012934 heterochromatin ; GO:0000792 | inferred from direct assay	zinc ion binding ; GO:0008270 | inferred from electronic annotation with InterPro:IPR012934 DNA binding ; GO:0003677 | inferred from direct assay
HMJ23636	62010	FBgn0033043	Or42b	Odorant receptor 42b	SKP1-related A (SkpA) is a subunit of Skp, Cullin, F-box (SCF)-containing ubiquitin ligase complexes. It regulates centrosome duplication, chromatin condensation, cell cycle progression, cell polarity, dendrite pruning and endoreduplication. [Date last reviewed: 2016-09-01]	detection of chemical stimulus involved in sensory perception of smell ; GO:0050911 | inferred from biological aspect of ancestor with PANTHER:PTN000474402 sensory perception of smell ; GO:0007608 | inferred from mutant phenotype	integral component of membrane ; GO:0016021 | inferred from biological aspect of ancestor with PANTHER:PTN000474402 plasma membrane ; GO:0005886 | inferred from biological aspect of ancestor with PANTHER:PTN000474402 dendrite membrane ; GO:0032590 | inferred from sequence or structural similarity with Or22a	olfactory receptor activity ; GO:0004984 | inferred from biological aspect of ancestor with PANTHER:PTN000474402 olfactory receptor activity ; GO:0004984 | inferred from mutant phenotype odorant binding ; GO:0005549 | inferred from sequence or structural similarity with Or43b
HMJ21558	54839	FBgn0037418	Osi11	Osiris 11	Insufficient genetic data for FlyBase to solicit a summary. [Date last reviewed: 2016-06-30]	biological_process ; GO:0008150 | no biological data available	integral component of plasma membrane ; GO:0005887 | inferred from sequence model	molecular_function ; GO:0003674 | no biological data available
HMJ23695	62338	FBgn0040087	p115	p115	P115 is a key protein of the early secretory pathway where it interacts with GM130 and Rab proteins. Depletion from S2 Cells leads to a fragmentation of the Golgi but without impairing transport efficiency. [Date last reviewed: 2016-08-18]	vesicle fusion with Golgi apparatus ; GO:0048280 | inferred from electronic annotation with InterPro:IPR006953 Golgi organization ; GO:0007030 | inferred from mutant phenotype transcytosis ; GO:0045056 | inferred from biological aspect of ancestor with PANTHER:PTN000000707 intracellular protein transport ; GO:0006886 | inferred from biological aspect of ancestor with PANTHER:PTN000000707 regulati…	Golgi membrane ; GO:0000139 | inferred from electronic annotation with InterPro:IPR006953 Golgi stack ; GO:0005795 | inferred from biological aspect of ancestor with PANTHER:PTN000000707 Golgi stack ; GO:0005795 | inferred from direct assay ER to Golgi transport vesicle membrane ; GO:0012507 | inferred from biological aspect of ancestor with PANTHER:PTN000000707 endoplasmic reticulum ; GO:0005783…	protein transporter activity ; GO:0008565 | inferred from biological aspect of ancestor with PANTHER:PTN000000707
HMC04104	56883	FBgn0027580	PCB	Pyruvate carboxylase	Insufficient genetic data for FlyBase to solicit a summary. [Date last reviewed: 2016-06-30]	pyruvate metabolic process ; GO:0006090 | inferred from sequence or structural similarity with UniProtKB:P11498 gluconeogenesis ; GO:0006094 | inferred from biological aspect of ancestor with PANTHER:PTN001821692 pyruvate metabolic process ; GO:0006090 | inferred from biological aspect of ancestor with PANTHER:PTN001821692	mitochondrion ; GO:0005739 | inferred from high throughput direct assay mitochondrial matrix ; GO:0005759 | inferred from sequence or structural similarity with UniProtKB:P11498 cytoplasm ; GO:0005737 | inferred from biological aspect of ancestor with PANTHER:PTN001821692	ATP binding ; GO:0005524 | inferred from electronic annotation with InterPro:IPR005479, InterPro:IPR005930, InterPro:IPR011761, InterPro:IPR011764, InterPro:IPR013815, InterPro:IPR013816 biotin binding ; GO:0009374 | inferred from electronic annotation with InterPro:IPR005930 metal ion binding ; GO:0046872 | inferred from electronic annotation with InterPro:IPR011761 pyruvate carboxylase activity…
HMC03648	52908	FBgn0053198	pen-2	presenilin enhancer	-	amyloid-beta formation ; GO:0034205 | inferred from direct assay membrane protein ectodomain proteolysis ; GO:0006509 | inferred from direct assay amyloid-beta formation ; GO:0034205 | inferred from mutant phenotype Notch signaling pathway ; GO:0007219 | inferred from mutant phenotype Notch signaling pathway ; GO:0007219 | inferred from genetic interaction with aph-1, Nct, Psn Notch receptor proc…	late endosome ; GO:0005770 | inferred from direct assay gamma-secretase complex ; GO:0070765 | inferred from biological aspect of ancestor with PANTHER:PTN000418972 gamma-secretase complex ; GO:0070765 | inferred from physical interaction with aph-1, Nct, Psn recycling endosome ; GO:0055037 | inferred from direct assay	-
HMC05030	60037	FBgn0030310	PGRP-SA	Peptidoglycan recognition protein SA	Peptidoglycan recognition protein SA is a secreted protein that mediates Toll pathway activation during bacterial infection. It binds to peptidoglycans and, together with GNBP1, activates the serine protease modSP. [Date last reviewed: 2016-06-23]	innate immune response ; GO:0045087 | inferred from electronic annotation with InterPro:IPR017331 defense response to Gram-positive bacterium ; GO:0050830 | inferred from genetic interaction with GNBP1, modSP defense response to Gram-positive bacterium ; GO:0050830 | inferred from genetic interaction with GNBP1 positive regulation of biosynthetic process of antibacterial peptides active against G…	extracellular space ; GO:0005615 | inferred from biological aspect of ancestor with PANTHER:PTN001664863 extracellular region ; GO:0005576 | inferred from direct assay	zinc ion binding ; GO:0008270 | inferred from electronic annotation with InterPro:IPR006619 peptidoglycan binding ; GO:0042834 | inferred from biological aspect of ancestor with PANTHER:PTN001664863 peptidoglycan receptor activity ; GO:0016019 | inferred from sequence or structural similarity with UniProtKB:O76537 peptidoglycan binding ; GO:0042834 | inferred from direct assay peptidoglycan recep…
HMS02619	42926	FBgn0002521	pho	pleiohomeotic	Pleiohomeotic is a zinc-finger protein that binds to Polycomb Response Elements and is required for recruitment of Polycomb group protein complexes to chromatin. It is primarily a transcriptional repressor. [Date last reviewed: 2016-06-23]	DNA topological change ; GO:0006265 | inferred from direct assay dendrite morphogenesis ; GO:0048813 | inferred from mutant phenotype regulation of transcription, DNA-templated ; GO:0006355 | inferred from mutant phenotype chromatin silencing ; GO:0006342 | non-traceable author statement chromatin remodeling ; GO:0006338 | inferred by curator from GO:0031011 gene silencing ; GO:0016458 | inferred…	polytene chromosome puff ; GO:0005703 | inferred from direct assay nucleus ; GO:0005634 | inferred from biological aspect of ancestor with PANTHER:PTN000360827 nucleus ; GO:0005634 | inferred from direct assay nuclear chromatin ; GO:0000790 | inferred from direct assay PcG protein complex ; GO:0031519 | inferred from direct assay nuclear chromatin ; GO:0000790 | inferred from biological aspect of…	protein binding ; GO:0005515 | inferred from physical interaction with UniProtKB:Q9VDY1 sequence-specific DNA binding ; GO:0043565 | inferred from biological aspect of ancestor with PANTHER:PTN000360827 DNA binding ; GO:0003677 | traceable author statement DNA binding ; GO:0003677 | inferred from direct assay RNA polymerase II distal enhancer sequence-specific DNA binding ; GO:0000980 | inferred …
HMS02398	41997	FBgn0260962	pic	piccolo	piccolo encodes the Ddb1 protein, which functions to recruit substrate receptors to Cul4-based E3 ubiquitin ligase complexes, which catalyze the ubiquitylation and subsequent destruction of proteins that function in cell growth and proliferation as well as transcription, replication and repair of the genome. [Date last reviewed: 2016-08-25]	DNA repair ; GO:0006281 | inferred from electronic annotation with InterPro:IPR031297 wing disc development ; GO:0035220 | inferred from mutant phenotype negative regulation of smoothened signaling pathway ; GO:0045879 | inferred from mutant phenotype eggshell chorion gene amplification ; GO:0007307 | inferred from direct assay defense response to fungus ; GO:0050832 | inferred from mutant phenot…	nucleus ; GO:0005634 | inferred from sequence or structural similarity with UniProtKB:Q16531 cytoplasm ; GO:0005737 | inferred from sequence or structural similarity with UniProtKB:Q16531 nucleus ; GO:0005634 | inferred from biological aspect of ancestor with PANTHER:PTN000068362	protein binding ; GO:0005515 | inferred from physical interaction with UniProtKB:Q7K0T0 inferred from physical interaction with UniProtKB:Q9VMI1 damaged DNA binding ; GO:0003684 | inferred from biological aspect of ancestor with PANTHER:PTN000068363
HMJ23951	62696	FBgn0034270	PIG-A	Phosphatidylinositol glycan anchor biosynthesis class A	Insufficient genetic data for FlyBase to solicit a summary. [Date last reviewed: 2016-06-30]	GPI anchor biosynthetic process ; GO:0006506 | inferred from biological aspect of ancestor with PANTHER:PTN000282535 GPI anchor biosynthetic process ; GO:0006506 | inferred from sequence or structural similarity with HGNC:8957	integral component of endoplasmic reticulum membrane ; GO:0030176 | inferred from sequence or structural similarity with HGNC:8957 glycosylphosphatidylinositol-N-acetylglucosaminyltransferase (GPI-GnT) complex ; GO:0000506 | inferred from biological aspect of ancestor with PANTHER:PTN000282535	phosphatidylinositol N-acetylglucosaminyltransferase activity ; GO:0017176 | inferred from biological aspect of ancestor with PANTHER:PTN000282535
HMC04931	57740	FBgn0086706	pix	pixie	pixie encodes ABCE1, which is an ATPase that functions as a translation recycling factor. It is required for the assembly of complexes involved in translation initiation, and plays a role in the regulation of cellular and organismal growth. [Date last reviewed: 2016-06-23]	nuclear-transcribed mRNA catabolic process, non-stop decay ; GO:0070481 | inferred from genetic interaction with pcm translation ; GO:0006412 | inferred from mutant phenotype translational termination ; GO:0006415 | inferred from biological aspect of ancestor with PANTHER:PTN000443727 ribosome disassembly ; GO:0032790 | inferred from sequence or structural similarity with SGD:S000002498 negative …	cytoplasm ; GO:0005737 | inferred from direct assay cytosol ; GO:0005829 | inferred from direct assay	ATPase activity ; GO:0016887 | inferred from electronic annotation with InterPro:IPR003439, InterPro:IPR017871 ATP binding ; GO:0005524 | inferred from mutant phenotype ATP binding ; GO:0005524 | inferred from biological aspect of ancestor with PANTHER:PTN000443727 iron ion binding ; GO:0005506 | inferred from biological aspect of ancestor with PANTHER:PTN000443727 translation initiation factor b…
HMC04936	57743	FBgn0000273	Pka-C1	Protein kinase, cAMP-dependent, catalytic subunit 1	Protein kinase, cAMP-dependent, catalytic subunit 1 is a serine/threonine kinase that contributes to axis specification, rhythmic behavior and synaptic transmission. [Date last reviewed: 2016-12-01]	sprouting of injured axon ; GO:0048682 | inferred from mutant phenotype positive regulation of smoothened signaling pathway ; GO:0045880 | inferred from mutant phenotype positive regulation of smoothened signaling pathway ; GO:0045880 | inferred from genetic interaction with Gprk2 regulation of pole plasm oskar mRNA localization ; GO:0007317 | inferred from mutant phenotype regulation of circadia…	cell body ; GO:0044297 | inferred from direct assay dendrite ; GO:0030425 | inferred from direct assay cytosol ; GO:0005829 | inferred from direct assay plasma membrane ; GO:0005886 | inferred from direct assay	ATP binding ; GO:0005524 | inferred from electronic annotation with InterPro:IPR000719, InterPro:IPR000961, InterPro:IPR002290, InterPro:IPR017441 protein binding ; GO:0005515 | inferred from physical interaction with slo protein serine/threonine kinase activity ; GO:0004674 | inferred from direct assay protein serine/threonine kinase activity ; GO:0004674 | inferred from mutant phenotype
HMJ30068	62991	FBgn0000442	Pkg21D	Protein kinase, cGMP-dependent at 21D	Protein kinase, cGMP-dependent at 21D is a Mg[+] dependent-kinase that is activated by cGMP. It contributes to somatic muscle development, salivary gland morphogenesis and epithelial fluid transport. [Date last reviewed: 2016-12-01]	larval somatic muscle development ; GO:0007526 | inferred from mutant phenotype protein phosphorylation ; GO:0006468 | inferred from direct assay protein phosphorylation ; GO:0006468 | non-traceable author statement	cytoplasm ; GO:0005737 | inferred from direct assay	ATP binding ; GO:0005524 | inferred from electronic annotation with InterPro:IPR000719, InterPro:IPR000961, InterPro:IPR002290, InterPro:IPR002374, InterPro:IPR017441 cGMP-dependent protein kinase activity ; GO:0004692 | inferred from direct assay protein serine/threonine kinase activity ; GO:0004674 | non-traceable author statement
HMS00530	33042	FBgn0003124	polo	polo	-	meiotic spindle midzone assembly ; GO:0051257 | inferred from mutant phenotype protein localization ; GO:0008104 | non-traceable author statement oocyte fate commitment ; GO:0048600 | inferred from mutant phenotype sperm aster formation ; GO:0035044 | inferred from mutant phenotype regulation of cytokinesis ; GO:0032465 | inferred from biological aspect of ancestor with PANTHER:PTN000679869 pronu…	spindle pole ; GO:0000922 | inferred from biological aspect of ancestor with PANTHER:PTN000679869 midbody ; GO:0030496 | inferred from direct assay spindle pole ; GO:0000922 | inferred from direct assay centriole ; GO:0005814 | inferred from direct assay centrosome ; GO:0005813 | inferred from biological aspect of ancestor with PANTHER:PTN000679869 kinetochore ; GO:0000776 | inferred from direct …	ATP binding ; GO:0005524 | inferred from electronic annotation with InterPro:IPR000719, InterPro:IPR002290 protein serine/threonine kinase activity ; GO:0004674 | inferred from sequence or structural similarity protein kinase activity ; GO:0004672 | non-traceable author statement protein kinase activity ; GO:0004672 | inferred from direct assay protein serine/threonine kinase activity ; GO:000467…
HMJ21614	52947	FBgn0036239	Pop2	Pop2	-	negative regulation of translation ; GO:0017148 | inferred from direct assay nuclear-transcribed mRNA poly(A) tail shortening ; GO:0000289 | inferred from mutant phenotype mRNA catabolic process ; GO:0006402 | inferred from direct assay negative regulation of translation ; GO:0017148 | inferred from biological aspect of ancestor with PANTHER:PTN000084083 exonucleolytic nuclear-transcribed mRNA ca…	P-body ; GO:0000932 | inferred from biological aspect of ancestor with PANTHER:PTN000084083 CCR4-NOT core complex ; GO:0030015 | inferred from biological aspect of ancestor with PANTHER:PTN000084083 cytosol ; GO:0005829 | inferred from high throughput direct assay cytoplasm ; GO:0005737 | inferred from direct assay CCR4-NOT complex ; GO:0030014 | inferred from direct assay	nucleic acid binding ; GO:0003676 | inferred from electronic annotation with InterPro:IPR012337 poly(A)-specific ribonuclease activity ; GO:0004535 | inferred from biological aspect of ancestor with PANTHER:PTN000084083 poly(A)-specific ribonuclease activity ; GO:0004535 | inferred from direct assay protein binding ; GO:0005515 | inferred from physical interaction with UniProtKB:Q8SY33
HMJ21831	57823	FBgn0023177	Pp4-19C	Protein phosphatase 19C	-	microtubule-based process ; GO:0007017 | inferred from mutant phenotype mitotic cell cycle ; GO:0000278 | inferred from mutant phenotype negative regulation of smoothened signaling pathway ; GO:0045879 | inferred from mutant phenotype protein dephosphorylation ; GO:0006470 | inferred from mutant phenotype negative regulation of smoothened signaling pathway ; GO:0045879 | inferred from genetic int…	centrosome ; GO:0005813 | inferred from direct assay chromosome, centromeric region ; GO:0000775 | inferred from physical interaction with Cenp-C protein phosphatase 4 complex ; GO:0030289 | inferred from direct assay nucleus ; GO:0005634 | inferred from direct assay cytoplasm ; GO:0005737 | inferred from direct assay	protein serine/threonine phosphatase activity ; GO:0004722 | inferred from mutant phenotype
HMC04959	57765	FBgn0003139	PpV	Protein phosphatase V	Protein phosphatase V (PpV) encodes the catalytic subunit of the protein phosphatase 6 (PP6), which negatively regulates JNK and AMPK signaling. PpV product is essential for lipid homeostasis and Ras-induced tumorigenesis. [Date last reviewed: 2018-09-20]	mitotic cell cycle ; GO:0000278 | inferred from mutant phenotype protein dephosphorylation ; GO:0006470 | non-traceable author statement G1/S transition of mitotic cell cycle ; GO:0000082 | inferred from genetic interaction with SGD:S000002205 negative regulation of JNK cascade ; GO:0046329 | inferred from mutant phenotype protein dephosphorylation ; GO:0006470 | inferred from sequence model	cytoplasm ; GO:0005737 | inferred from direct assay	hydrolase activity ; GO:0016787 | inferred from electronic annotation with InterPro:IPR004843, InterPro:IPR006186 protein serine/threonine phosphatase activity ; GO:0004722 | non-traceable author statement protein serine/threonine phosphatase activity ; GO:0004722 | inferred from sequence model
HMJ21589	54852	FBgn0039270	PQBP1	Poly-glutamine tract binding protein 1	Poly-glutamine tract binding protein 1 is a component of nuclear speckles and cytoplasmic stress granules. It is involved in RNA transcription, RNA splicing, and possibly in protein translation. [Date last reviewed: 2016-06-23]	microvillus organization ; GO:0032528 | inferred from mutant phenotype rhabdomere development ; GO:0042052 | inferred from mutant phenotype olfactory learning ; GO:0008355 | inferred from mutant phenotype mRNA splicing, via spliceosome ; GO:0000398 | inferred by curator from GO:0071011,GO:0071013 positive regulation of translation ; GO:0045727 | inferred from direct assay	rough endoplasmic reticulum ; GO:0005791 | inferred from direct assay catalytic step 2 spliceosome ; GO:0071013 | inferred from high throughput direct assay precatalytic spliceosome ; GO:0071011 | inferred from high throughput direct assay nucleus ; GO:0005634 | inferred from direct assay	-
HMC05249	62242	FBgn0032059	PrBP	Prenyl-binding protein	-	sensory perception of light stimulus ; GO:0050953 | inferred from electronic annotation with InterPro:IPR017287 mushroom body development ; GO:0016319 | inferred from mutant phenotype	nucleus ; GO:0005634 | inferred from direct assay cytoplasm ; GO:0005737 | inferred from direct assay	3',5'-cyclic-nucleotide phosphodiesterase activity ; GO:0004114 | inferred from electronic annotation with InterPro:IPR017287 protein binding ; GO:0005515 | inferred from physical interaction with UniProtKB:Q9VFI9
HMJ02107	42538	FBgn0004595	pros	prospero	Prospero (Pros) promotes the expression of neural differentiation genes and represses neuroblast stem cell identity genes and cell cycle proliferation genes; it is also important for astrocyte development. Pros is asymmetrically localized to the basal cortex during neuroblast asymmetric cell division, resulting in its partioning into GMC daughter cells, where it translocates into the nucleus. [Da…	glial cell differentiation ; GO:0010001 | inferred from mutant phenotype cell fate commitment ; GO:0045165 | inferred from mutant phenotype dendrite morphogenesis ; GO:0048813 | inferred from mutant phenotype axonogenesis ; GO:0007409 | inferred from mutant phenotype eye photoreceptor cell differentiation ; GO:0001754 | traceable author statement peripheral nervous system development ; GO:0007422…	nucleus ; GO:0005634 | inferred from biological aspect of ancestor with PANTHER:PTN000258074 apical cortex ; GO:0045179 | inferred from direct assay nucleus ; GO:0005634 | non-traceable author statement basal cortex ; GO:0045180 | non-traceable author statement plasma membrane ; GO:0005886 | inferred from direct assay nucleus ; GO:0005634 | inferred from direct assay basal cortex ; GO:0045180 | i…	DNA binding ; GO:0003677 | inferred from direct assay DNA-binding transcription factor activity ; GO:0003700 | traceable author statement DNA-binding transcription factor activity ; GO:0003700 | non-traceable author statement DNA-binding transcription repressor activity, RNA polymerase II-specific ; GO:0001227 | inferred from mutant phenotype DNA-binding transcription factor activity ; GO:0003700…
HMJ21359	53974	FBgn0250843	Prosalpha6	Proteasome alpha6 subunit	-	proteasomal protein catabolic process ; GO:0010498 | inferred from biological aspect of ancestor with PANTHER:PTN002266517 proteasome-mediated ubiquitin-dependent protein catabolic process ; GO:0043161 | inferred from biological aspect of ancestor with PANTHER:PTN000174701 proteasome-mediated ubiquitin-dependent protein catabolic process ; GO:0043161 | inferred by curator from GO:0000502 ventral …	proteasome core complex ; GO:0005839 | inferred from biological aspect of ancestor with PANTHER:PTN000174701 inferred from biological aspect of ancestor with PANTHER:PTN002266517 cytoplasm ; GO:0005737 | inferred from biological aspect of ancestor with PANTHER:PTN000174701 proteasome core complex, alpha-subunit complex ; GO:0019773 | inferred from sequence or structural similarity with UniProtKB:…	threonine-type endopeptidase activity ; GO:0004298 | inferred from electronic annotation with InterPro:IPR001353, InterPro:IPR023332 endopeptidase activity ; GO:0004175 | inferred from biological aspect of ancestor with PANTHER:PTN000174701 endopeptidase activity ; GO:0004175 | contributes_to inferred by curator from GO:0000502
HMC03943	55256	FBgn0036915	Prp3	Precursor RNA processing 3	-	mRNA splicing, via spliceosome ; GO:0000398 | inferred from sequence or structural similarity with SGD:S000003323 mRNA splicing, via spliceosome ; GO:0000398 | inferred from biological aspect of ancestor with PANTHER:PTN000368237 mRNA splicing, via spliceosome ; GO:0000398 | inferred by curator from GO:0071011 regulation of chromatin silencing ; GO:0031935 | inferred from mutant phenotype	U4/U6 x U5 tri-snRNP complex ; GO:0046540 | inferred from biological aspect of ancestor with PANTHER:PTN000368237 spliceosomal complex ; GO:0005681 | inferred from sequence or structural similarity with SGD:S000003323 nucleus ; GO:0005634 | inferred from direct assay precatalytic spliceosome ; GO:0071011 | inferred from high throughput direct assay	RNA binding ; GO:0003723 | inferred from sequence or structural similarity with HGNC:17348
HMC03485	51940	FBgn0036915	Prp3	Precursor RNA processing 3	-	mRNA splicing, via spliceosome ; GO:0000398 | inferred from sequence or structural similarity with SGD:S000003323 mRNA splicing, via spliceosome ; GO:0000398 | inferred from biological aspect of ancestor with PANTHER:PTN000368237 mRNA splicing, via spliceosome ; GO:0000398 | inferred by curator from GO:0071011 regulation of chromatin silencing ; GO:0031935 | inferred from mutant phenotype	U4/U6 x U5 tri-snRNP complex ; GO:0046540 | inferred from biological aspect of ancestor with PANTHER:PTN000368237 spliceosomal complex ; GO:0005681 | inferred from sequence or structural similarity with SGD:S000003323 nucleus ; GO:0005634 | inferred from direct assay precatalytic spliceosome ; GO:0071011 | inferred from high throughput direct assay	RNA binding ; GO:0003723 | inferred from sequence or structural similarity with HGNC:17348
HMC04052	55364	FBgn0036487	Prp31	Pre-mRNA processing factor 31	Prp31 is a splicing factor associated with U4/U6.U5 tri-snRNP. It plays important roles in pre-mRNA splicing and other steps of RNA processing. Prp31 is essential for photoreceptor development. [Date last reviewed: 2016-06-30]	spliceosomal tri-snRNP complex assembly ; GO:0000244 | inferred from electronic annotation with InterPro:IPR027105 mRNA splicing, via spliceosome ; GO:0000398 | inferred from biological aspect of ancestor with PANTHER:PTN000357441 mRNA splicing, via spliceosome ; GO:0000398 | inferred by curator from GO:0071011 mRNA splicing, via spliceosome ; GO:0000398 | inferred from sequence or structural sim…	U4/U6 x U5 tri-snRNP complex ; GO:0046540 | inferred from electronic annotation with InterPro:IPR027105 spliceosomal complex ; GO:0005681 | inferred from sequence or structural similarity with SGD:S000003323 inferred from sequence or structural similarity with protein_id:CAB43677 precatalytic spliceosome ; GO:0071011 | inferred from high throughput direct assay U4 snRNP ; GO:0005687 | inferred fr…	RNA binding ; GO:0003723 | inferred from sequence or structural similarity with HGNC:15446 ribonucleoprotein complex binding ; GO:0043021 | inferred from sequence or structural similarity with HGNC:15446
HMJ23254	61362	FBgn0031479	Prx6005	Peroxiredoxin 6005	Insufficient genetic data for FlyBase to solicit a summary. [Date last reviewed: 2016-06-30]	cell redox homeostasis ; GO:0045454 | inferred from electronic annotation with InterPro:IPR013766 oxidation-reduction process ; GO:0055114 | inferred from electronic annotation with InterPro:IPR000866, InterPro:IPR019479 cellular response to oxidative stress ; GO:0034599 | inferred from biological aspect of ancestor with PANTHER:PTN000073790 response to oxidative stress ; GO:0006979 | inferred fr…	cytosol ; GO:0005829 | inferred from biological aspect of ancestor with PANTHER:PTN000073790 cytosol ; GO:0005829 | inferred from direct assay	peroxiredoxin activity ; GO:0051920 | inferred from electronic annotation with InterPro:IPR019479 protein binding ; GO:0005515 | inferred from biological aspect of ancestor with PANTHER:PTN000841048 peroxidase activity ; GO:0004601 | inferred from biological aspect of ancestor with PANTHER:PTN000073790 peroxidase activity ; GO:0004601 | inferred from direct assay
HMS04497	57300	FBgn0243512	puc	puckered	Puckered is a serine/threonine protein phosphatase that mediates a feedback loop that regulates the Jun-N-terminal kinase pathway. [Date last reviewed: 2016-12-01]	negative regulation of JNK cascade ; GO:0046329 | traceable author statement establishment of planar polarity ; GO:0001736 | non-traceable author statement peripheral nervous system development ; GO:0007422 | traceable author statement response to oxidative stress ; GO:0006979 | inferred from mutant phenotype wound healing ; GO:0042060 | inferred from expression pattern cellular response to oxida…	endoplasmic reticulum ; GO:0005783 | inferred from direct assay Golgi apparatus ; GO:0005794 | inferred from direct assay cytoplasm ; GO:0005737 | inferred from biological aspect of ancestor with PANTHER:PTN001605855	protein tyrosine phosphatase activity ; GO:0004725 | inferred from electronic annotation with InterPro:IPR016130 JUN kinase phosphatase activity ; GO:0008579 | traceable author statement phosphoprotein phosphatase activity ; GO:0004721 | inferred from direct assay protein tyrosine/serine/threonine phosphatase activity ; GO:0008138 | non-traceable author statement MAP kinase tyrosine/serine/threon…
HMJ23960	62477	FBgn0039214	puf	puffyeye	Puffyeye (Puf) is an essential deubiquitinating enzyme that acts as a ubiquitin-specific protease. Puf removes ubiquitin polypeptide chains from Myc and CycE, thereby stabilizing these proteins and increasing their abundance to influence cell growth and proliferation. Puf antagonizes the ubiquitin ligase ago, and binds ago as well as its substrates. [Date last reviewed: 2016-12-15]	ubiquitin-dependent protein catabolic process ; GO:0006511 | inferred from electronic annotation with InterPro:IPR018200 protein deubiquitination ; GO:0016579 | inferred from mutant phenotype protein deubiquitination ; GO:0016579 | inferred from sequence or structural similarity with HGNC:20066 protein deubiquitination ; GO:0016579 | inferred from biological aspect of ancestor with PANTHER:PTN002…	nucleus ; GO:0005634 | inferred from direct assay	thiol-dependent ubiquitin-specific protease activity ; GO:0004843 | inferred from sequence or structural similarity with HGNC:20066 cysteine-type endopeptidase activity ; GO:0004197 | inferred from biological aspect of ancestor with PANTHER:PTN002541993 protein binding ; GO:0005515 | inferred from physical interaction with UniProtKB:Q9VZF4 inferred from physical interaction with UniProtKB:Q9W4S7 …
HMC04780	57469	FBgn0043900	pygo	pygopus	Pygopus is a key nuclear component of the Wnt signaling pathway. It facilitates arm recruitment to Wnt-responsive genes by interacting with the transcription cofactor Chi. It also binds lgs and His3 methylated tail to associate with arm in a process that may function as a transition from gene silence to Wnt-induced transcription. [Date last reviewed: 2016-06-23]	imaginal disc-derived wing expansion ; GO:0048526 | inferred from mutant phenotype wing disc morphogenesis ; GO:0007472 | inferred from mutant phenotype transcription, DNA-templated ; GO:0006351 | inferred from physical interaction with UniProtKB:P18824 inferred from physical interaction with UniProtKB:Q961D9 delamination ; GO:0060232 | inferred from mutant phenotype positive regulation of transc…	beta-catenin-TCF complex ; GO:1990907 | inferred from direct assay nucleus ; GO:0005634 | inferred from direct assay nucleus ; GO:0005634 | non-traceable author statement	methylated histone binding ; GO:0035064 | inferred from direct assay transcription coactivator activity ; GO:0003713 | inferred from direct assay inferred from genetic interaction with arm inferred from physical interaction with UniProtKB:P18824,UniProtKB:Q961D9
HMC04987	57793	FBgn0259785	pzg	putzig	Putzig is a nuclear protein that is involved in chromatin activation of replication related genes and signalling pathways including Notch, Ecdysone and JAK/STAT. It regulates growth, cell death and various developmental processes. [Date last reviewed: 2016-06-30]	regulation of gene expression ; GO:0010468 | inferred from genetic interaction with mrt chromosome organization ; GO:0051276 | inferred from mutant phenotype ecdysone receptor-mediated signaling pathway ; GO:0035076 | inferred from mutant phenotype positive regulation of Notch signaling pathway ; GO:0045747 | inferred from genetic interaction with N negative regulation of receptor signaling pathw…	polytene chromosome interband ; GO:0005705 | inferred from direct assay polytene chromosome ; GO:0005700 | inferred from direct assay nucleus ; GO:0005634 | colocalizes_with inferred from biological aspect of ancestor with PANTHER:PTN001228570 histone methyltransferase complex ; GO:0035097 | colocalizes_with inferred from biological aspect of ancestor with PANTHER:PTN001228570 nucleus ; GO:000563…	RNA polymerase II core promoter sequence-specific DNA binding ; GO:0000979 | inferred from biological aspect of ancestor with PANTHER:PTN001228570 chromatin binding ; GO:0003682 | inferred from direct assay protein binding ; GO:0005515 | inferred from physical interaction with UniProtKB:Q86BS3,UniProtKB:Q9VCH5,UniProtKB:Q9VGA4 transcription regulatory region DNA binding ; GO:0044212 | inferred fr…
HMC03966	55279	FBgn0022985	qkr58E-2	quaking related 58E-2	Insufficient genetic data for FlyBase to solicit a summary. [Date last reviewed: 2016-06-30]	-	-	RNA binding ; GO:0003723 | inferred from electronic annotation with InterPro:IPR004088
HMJ21399	53995	FBgn0029959	Rab39	Rab39	-	Rab protein signal transduction ; GO:0032482 | inferred from biological aspect of ancestor with PANTHER:PTN001292747 intracellular protein transport ; GO:0006886 | inferred from biological aspect of ancestor with PANTHER:PTN001292747 Rab protein signal transduction ; GO:0032482 | inferred from sequence or structural similarity with Rab11 vesicle-mediated transport ; GO:0016192 | inferred from seq…	Golgi apparatus ; GO:0005794 | inferred from direct assay synapse ; GO:0045202 | inferred from direct assay vesicle ; GO:0031982 | inferred from sequence or structural similarity with Rab11 neuronal cell body ; GO:0043025 | inferred from high throughput direct assay neuronal cell body ; GO:0043025 | inferred from direct assay late endosome ; GO:0005770 | inferred from high throughput direct assay	GTP binding ; GO:0005525 | inferred from electronic annotation with InterPro:IPR001806, InterPro:IPR005225 GTPase activity ; GO:0003924 | inferred from biological aspect of ancestor with PANTHER:PTN001292747 GTPase activity ; GO:0003924 | inferred from sequence or structural similarity with Rab11 protein binding ; GO:0005515 | inferred from physical interaction with BicD inferred from physical in…
HMJ23142	61308	FBgn0030391	Rab40	Rab40	-	Rab protein signal transduction ; GO:0032482 | inferred from sequence or structural similarity with Rab11 intracellular protein transport ; GO:0006886 | inferred from biological aspect of ancestor with PANTHER:PTN001292747 Rab protein signal transduction ; GO:0032482 | inferred from biological aspect of ancestor with PANTHER:PTN001292747 vesicle-mediated transport ; GO:0016192 | inferred from seq…	vesicle ; GO:0031982 | inferred from sequence or structural similarity with Rab11 Golgi membrane ; GO:0000139 | inferred from biological aspect of ancestor with PANTHER:PTN002375302	GTP binding ; GO:0005525 | inferred from electronic annotation with InterPro:IPR001806, InterPro:IPR003579, InterPro:IPR005225 GTPase activity ; GO:0003924 | inferred from biological aspect of ancestor with PANTHER:PTN001292747 GTPase activity ; GO:0003924 | inferred from sequence or structural similarity with Rab11
HMJ22657	60399	FBgn0020618	Rack1	Receptor of activated protein kinase C 1	Receptor of activated protein kinase C 1 is a cytosolic adaptor protein that is essential during development, particularly oogenesis. [Date last reviewed: 2016-06-23]	rescue of stalled ribosome ; GO:0072344 | inferred from biological aspect of ancestor with PANTHER:PTN000458645 muscle cell cellular homeostasis ; GO:0046716 | inferred from genetic interaction with Dg inferred from genetic interaction with Dys wing disc development ; GO:0035220 | inferred from mutant phenotype positive regulation by host of viral genome replication ; GO:0044829 | inferred from m…	catalytic step 2 spliceosome ; GO:0071013 | inferred from high throughput direct assay nucleus ; GO:0005634 | inferred from biological aspect of ancestor with PANTHER:PTN000458645 cytosol ; GO:0005829 | inferred from biological aspect of ancestor with PANTHER:PTN000458645 cytosolic small ribosomal subunit ; GO:0022627 | inferred from biological aspect of ancestor with PANTHER:PTN000458645 cytosol…	enzyme binding ; GO:0019899 | inferred from biological aspect of ancestor with PANTHER:PTN000458645 ribosome binding ; GO:0043022 | inferred from biological aspect of ancestor with PANTHER:PTN000458645 protein kinase C binding ; GO:0005080 | inferred from biological aspect of ancestor with PANTHER:PTN000458645
HMJ22657	60399	FBgn0020618	Rack1	Receptor of activated protein kinase C 1	Receptor of activated protein kinase C 1 is a cytosolic adaptor protein that is essential during development, particularly oogenesis. [Date last reviewed: 2016-06-23]	rescue of stalled ribosome ; GO:0072344 | inferred from biological aspect of ancestor with PANTHER:PTN000458645 muscle cell cellular homeostasis ; GO:0046716 | inferred from genetic interaction with Dg inferred from genetic interaction with Dys wing disc development ; GO:0035220 | inferred from mutant phenotype positive regulation by host of viral genome replication ; GO:0044829 | inferred from m…	catalytic step 2 spliceosome ; GO:0071013 | inferred from high throughput direct assay nucleus ; GO:0005634 | inferred from biological aspect of ancestor with PANTHER:PTN000458645 cytosol ; GO:0005829 | inferred from biological aspect of ancestor with PANTHER:PTN000458645 cytosolic small ribosomal subunit ; GO:0022627 | inferred from biological aspect of ancestor with PANTHER:PTN000458645 cytosol…	enzyme binding ; GO:0019899 | inferred from biological aspect of ancestor with PANTHER:PTN000458645 ribosome binding ; GO:0043022 | inferred from biological aspect of ancestor with PANTHER:PTN000458645 protein kinase C binding ; GO:0005080 | inferred from biological aspect of ancestor with PANTHER:PTN000458645
HMJ21842	57832	FBgn0034646	Rae1	Rae1	Rae1 is a nucleoporin member of the WD40-repeat Î² propeller protein super family. Biological roles of the pleiotropic Rae1 gene include poly(A)+ mRNA export, cell cycle regulation, male meiosis control and male germ cell post-meiotic differentiation. [Date last reviewed: 2016-06-30]	regulation of autophagy ; GO:0010506 | inferred from mutant phenotype transcription-dependent tethering of RNA polymerase II gene DNA at nuclear periphery ; GO:0000972 | inferred from biological aspect of ancestor with PANTHER:PTN000103934 regulation of G1/S transition of mitotic cell cycle ; GO:2000045 | inferred from mutant phenotype male meiosis I ; GO:0007141 | inferred from mutant phenotype …	Nebenkern ; GO:0016006 | inferred from direct assay nucleus ; GO:0005634 | inferred from direct assay nuclear envelope ; GO:0005635 | inferred from direct assay sperm flagellum ; GO:0036126 | inferred from direct assay nuclear pore ; GO:0005643 | inferred from biological aspect of ancestor with PANTHER:PTN000103934 nuclear pore ; GO:0005643 | inferred from physical interaction with Nup98-96	protein binding ; GO:0005515 | inferred from physical interaction with UniProtKB:Q9VCH5 protein binding ; GO:0005515 | inferred from physical interaction with hiw inferred from physical interaction with Nup98-96 inferred from physical interaction with Fsn ubiquitin binding ; GO:0043130 | inferred from biological aspect of ancestor with PANTHER:PTN000103837 RNA binding ; GO:0003723 | inferred from…
HMC05142	61172	FBgn0262114	RanBPM	Ran-binding protein M	Ran-binding protein M (RanBPM) is involved in cell adhesion and it regulates the shape, size, and organization of the germline stem cell niche in the ovary. [Date last reviewed: 2016-09-01]	larval feeding behavior ; GO:0030536 | inferred from mutant phenotype germ-line stem-cell niche homeostasis ; GO:0060250 | inferred from mutant phenotype dorsal appendage formation ; GO:0046843 | inferred from mutant phenotype ovarian follicle cell-cell adhesion ; GO:0007299 | inferred from mutant phenotype receptor signaling pathway via JAK-STAT ; GO:0007259 | inferred from mutant phenotype cyto…	cytoplasm ; GO:0005737 | inferred from direct assay membrane ; GO:0016020 | inferred from direct assay nucleus ; GO:0005634 | inferred from direct assay	Ran GTPase binding ; GO:0008536 | inferred from sequence or structural similarity with HGNC:13727
[truncated: 5,044 more rows]
